# Supplementary material for: Chromatography with On-line HPLC and Ion Chromatography For Process Control
Source: Royal Society of Chemistry journal article supplement (doi:10.1039/d0dt03884a), 2002-01-01
Supplement: d0dt03884a1.pdf [file d0dt03884a1.pdf]

## Electronic Supplementary Information (ESI)

### **A case study on the conversion of Li/Cl phosphinidenoid into phosphinidene complexes**

Philip Junker,<sup>a</sup> Zheng-Wang Qu,<sup>b\*</sup> Tim Kalisch,<sup>a</sup> Gregor Schnakenburg,<sup>a</sup> Arturo Espinosa Ferao,<sup>c\*</sup> and Rainer Streubel<sup>a\*</sup>

## Table of Contents

|                                                                                       |        |
|---------------------------------------------------------------------------------------|--------|
| Experimental Procedures                                                               |        |
| Synthesis of Complex <b>1a</b>                                                        | S3     |
| Synthesis of Complex <b>1b</b>                                                        | S3     |
| Reaction of <b>1a,b</b> with MeOH                                                     | S4     |
| Reaction of <b>1a,b</b> with MeNH <sub>2</sub>                                        | S4     |
| Reaction of <b>1a,b</b> with toluene                                                  | S4     |
| Reaction of <b>1b</b> with 1-pentene/1-hexene                                         | S4     |
| NMR Spectra                                                                           |        |
| Complex <b>1a</b>                                                                     | S6-7   |
| Complex <b>1b</b>                                                                     | S7-9   |
| Complex <b>3a</b>                                                                     | S10-11 |
| Complex <b>4a</b>                                                                     | S12-13 |
| Complex <b>6b</b>                                                                     | S14-15 |
| Complex <b>7b</b>                                                                     | S16-17 |
| Complex <b>8b</b>                                                                     | S18-19 |
| Temperature studies on the reaction of <b>1a</b> with <sup>t</sup> BuLi               | S20    |
| Temperature studies on the reaction of <b>1b</b> with <sup>t</sup> BuLi               | S20    |
| Temperature studies on the reaction of <b>1b</b> with <sup>t</sup> BuLi and 1-pentene | S21    |
| Crystallographic Data                                                                 |        |
| Complex <b>1a</b>                                                                     | S22    |
| Complex <b>cP-P</b>                                                                   | S22    |
| Computational details (theory part)                                                   | S23    |
| Cartesian coordinates                                                                 | S28    |
| Calculated <sup>31</sup> P NMR shifts                                                 | S76    |

## Experimental Procedures

The syntheses of all compounds were performed under an argon atmosphere, using common Schlenk techniques and dry solvents. Tetrahydrofuran (THF), diethyl ether, petrol ether (40/60) and *n*-pentane were dried over sodium wire/benzophenone, CH<sub>2</sub>Cl<sub>2</sub> over CaH<sub>2</sub>, toluene over sodium and further purified by subsequent distillation. The used alcohols/amines were distilled under argon atmosphere before usage. *N,N*-Diphenylaminodichlorophosphane and *N,N*-dicyclohexylaminodichlorophosphane were synthesized according to [19] and [20]. All NMR spectra were recorded on a Bruker AVI-300 (300.1 MHz for <sup>1</sup>H, 75.5 MHz for <sup>13</sup>C, 59.6 MHz for <sup>29</sup>Si and 121.5 MHz for <sup>31</sup>P), Bruker AVI-400 (400.1 MHz for <sup>1</sup>H, 100.6 MHz for <sup>13</sup>C, 79.5 MHz for <sup>29</sup>Si and 162.0 MHz for <sup>31</sup>P) and Bruker AV III HD Prodigy 500 (500.2 MHz for <sup>1</sup>H, 125.8 MHz for <sup>13</sup>C, 99.3 MHz for <sup>29</sup>Si, and 202.5 MHz for <sup>31</sup>P) spectrometers at 25 °C. The <sup>1</sup>H and <sup>13</sup>C NMR spectra were referenced to the residual proton resonances and the <sup>13</sup>C NMR signals of the deuterated solvents; <sup>31</sup>P NMR spectra were referenced to 85% H<sub>3</sub>PO<sub>4</sub> as an external standard, respectively. Melting points were determined in one-side melted off capillaries using a Büchi Type S or a Carl Roth Type MPM-2 apparatus and are uncorrected. Elemental analyses were carried out on a Vario EL gas chromatograph. Mass spectrometric data were collected on a MAT 90 Thermo Finnigan sector instrument equipped with a LIFDI ion source from Linden CMS GmbH. IR spectra of all compounds were recorded on a Thermo Nicolet 380 FT-IR spectrometer with an attenuated total reflection (ATR) attachment or a Bruker Alpha Diamond ATR FTIR spectrometer. X-ray data were collected with a Bruker D8-Venture, STOE IPDS-2T and Bruker X8-KappaApexII diffractometer. CCDC 1919557 and 1919561 contain the supplementary crystallographic data (see ESI).

**Synthesis of Complex 1a.** W(CO)<sub>6</sub> (3.05 g, 8.69 mmol) was dissolved in THF (250 mL) before radiation was started for 1.5 h at -10 °C. The *N,N*-Diphenylaminodichlorophosphane (2.30 mg, 8.52 mmol) was added and the reaction mixture was stirred for 3 h at ambient temperature. The THF was removed in vacuo (10<sup>-2</sup> mbar) and the obtained oily residue was filtered through silica (2 cm SiO<sub>2</sub>, Ø 4 cm, r.t.) with toluene (200 mL). The toluene was removed *in vacuo* (10<sup>-2</sup> mbar) and the residue washed with *n*-pentane (10 mL) at -50 °C to obtain complex **1a** as a beige/yellow solid (2.5 g, 48 %, m.p. 172 °C).

**1a:** <sup>1</sup>H NMR (500.1 MHz, 298.0 K, C<sub>6</sub>D<sub>6</sub>) δ/ppm = 6.90 (m, 1 H, *para*-H), 6.97 (t, <sup>3</sup>J<sub>H,H</sub> = 7.8 Hz, 2 H, *meta*-H), 7.26 (d, <sup>3</sup>J<sub>H,H</sub> = 7.8 Hz, 2 H, *ortho*-H). <sup>13</sup>C{<sup>1</sup>H} NMR (125.8 MHz, 298.0 K, C<sub>6</sub>D<sub>6</sub>): δ/ppm = 128.5 (d, <sup>5</sup>J<sub>P,C</sub> = 1.4 Hz, *para*-C), 129.5 (d, <sup>3</sup>J<sub>P,C</sub> = 6.1 Hz, *ortho*-C), 129.9 (s, *meta*-C), 144.1 (<sup>2</sup>J<sub>P,C</sub> = 5.1 Hz, C<sub>quat</sub>), 195.2 (d<sub>sat</sub>, <sup>1</sup>J<sub>W,C</sub> = 127.7 Hz, <sup>1</sup>J<sub>P,C</sub> = 8.3 Hz, *cis*-CO), 197.9 (d<sub>sat</sub>, <sup>1</sup>J<sub>W,C</sub> = 141.2 Hz, <sup>1</sup>J<sub>P,C</sub> = 53.2 Hz, *trans*-CO). <sup>31</sup>P NMR (202.5 MHz, 298.0 K, C<sub>6</sub>D<sub>6</sub>): δ/ppm = 108.6 (s<sub>sat</sub>, <sup>1</sup>J<sub>W,P</sub> = 388.7 Hz). MS (EI, 70 eV, <sup>184</sup>W) m/z (%) = 592.9 (34) [M]<sup>++</sup>, 557.9 (20) [M-Cl]<sup>+</sup>, 269.0 (6) [M-W(CO)<sub>5</sub>]<sup>+</sup>, 234.0 (100) [M-Cl-W(CO)<sub>5</sub>]<sup>+</sup>, 168.0 (26) [NPh<sub>2</sub>]<sup>+</sup>, 77.0 (12) [C<sub>6</sub>H<sub>5</sub>]<sup>+</sup>. IR (ATR diamond)  $\tilde{\nu}$ /cm<sup>-1</sup> = 3061 (w, ν(CH)), 2081 (s, ν(CO)), 1997 (m, ν(CO)), 1980 (w, ν(CO)), 1931 (vs, ν(CO)). Anal. calc. for C<sub>17</sub>H<sub>10</sub>Cl<sub>2</sub>NO<sub>5</sub>PW, C 34.38 H 1.70 N 2.36; found C 34.73 H 1.81 N 2.46.

**Synthesis of Complex 1b.** W(CO)<sub>6</sub> (1.50 g, 4.26 mmol) was dissolved in THF (100 mL) before radiation was started for 1 h at 10 °C. The *N,N*-dicyclohexylaminodichlorophosphane (1.20 g, 4.25 mmol) was added and the reaction mixture was stirred for 2 h at ambient temperature. The THF was removed in vacuo (10<sup>-2</sup> mbar) and the obtained oily residue was filtered through alox (2 cm Al<sub>2</sub>O<sub>3</sub>, Ø 3 cm, r.t.) with Et<sub>2</sub>O (200 mL). The Et<sub>2</sub>O was removed *in vacuo* (10<sup>-2</sup> mbar) and the residue washed with *n*-pentane (10 mL) at -40 °C to obtain complex **1b** as a white solid (900 mg, 35 %, m.p. 99 - 103 °C).

**1b:** <sup>1</sup>H NMR (400.1 MHz, 298.0 K, C<sub>6</sub>D<sub>6</sub>) δ/ppm = 0.83 (qt, J<sub>H,H</sub> = 13.0 Hz, J<sub>H,H</sub> = 3.5 Hz, 1H, NCH(CH<sub>2</sub>)(CH<sub>2</sub>)(CH<sub>2</sub>)), 1.15 (qt, J<sub>H,H</sub> = 13.2 Hz, J<sub>H,H</sub> = 3.6 Hz, 2H, NCH(CH<sub>2</sub>)(CH<sub>2</sub>)), 1.41 (dt, J<sub>H,H</sub> = 13.6 Hz, J<sub>H,H</sub> = 3.2 Hz, 1H, NCH(CH<sub>2</sub>)(CH<sub>2</sub>)), 1.50 - 1.62 (m, 4H, NCH(CH<sub>2</sub>), NCH(CH<sub>2</sub>)(CH<sub>2</sub>)), 1.67 - 1.77 (m, 2H, NCH(CH<sub>2</sub>)(CH<sub>2</sub>)), 3.89 (br. d, <sup>2</sup>J<sub>P,H</sub> = 11.0 Hz, 1H, NCH). <sup>13</sup>C{<sup>1</sup>H} NMR (100.6 MHz, 298 K, C<sub>6</sub>D<sub>6</sub>) δ/ppm = 25.4 (s, NCH(CH<sub>2</sub>)(CH<sub>2</sub>)), 26.8 (s, NCH(CH<sub>2</sub>)(CH<sub>2</sub>)), 33.9 (d, <sup>3</sup>J<sub>P,C</sub> = 5.6 Hz, NCH(CH<sub>2</sub>)), 62.8 (d, <sup>2</sup>J<sub>P,C</sub> = 9.8 Hz, NCH), 196.1 (d<sub>sat</sub>, <sup>1</sup>J<sub>W,C</sub> = 135.9 Hz, <sup>1</sup>J<sub>P,C</sub> = 8.6 Hz, *cis*-CO), 198.6 (d, <sup>1</sup>J<sub>P,C</sub> = 50.7 Hz, *trans*-CO). <sup>31</sup>P NMR (162.1 MHz, 298.0 K, C<sub>6</sub>D<sub>6</sub>) δ/ppm = 118.4 (br. s). <sup>31</sup>P{<sup>1</sup>H} NMR (121.5 MHz, 193.0 K, THF) δ/ppm = 110.8 (s<sub>sat</sub>, <sup>1</sup>J<sub>W,P</sub> = 379.6 Hz) (61 %), 126.7 (s<sub>sat</sub>, <sup>1</sup>J<sub>W,P</sub> = 368.2 Hz) (39 %). MS (EI, 70 eV, <sup>184</sup>W) m/z (%) = 605.0 [M]<sup>++</sup>, 570.0 [M-Cl]<sup>+</sup>, 486.1 [M-Cl-3CO]<sup>+</sup>, 465.0 [M-5CO]<sup>+</sup>, 281.1 [M-W(CO)<sub>5</sub>]<sup>+</sup>, 246.1 (100) [CIPN(Cy)<sub>2</sub>]<sup>+</sup>, 83.1 [C<sub>6</sub>H<sub>11</sub>]<sup>+</sup>. IR (ATR diamond)  $\tilde{\nu}$ /cm<sup>-1</sup> = 2931 (m, ν(CH)), 2857 (w, ν(CH)), 2080 (m, ν(CO)), 1949 (s, ν(CO)), 1916 (vs, ν(CO)). Anal. calc. for C<sub>17</sub>H<sub>22</sub>Cl<sub>2</sub>NO<sub>5</sub>PW, C 33.69 H 3.66 N 2.31; found C 33.80 H 3.85 N 2.48.

**Procedure for the reactions of complexes 1a,b with MeOH.** 0.1 mmol of **1a, b** (69 mg (**a**), 61 mg (**b**)) was dissolved in 2.5 mL THF before 32 µL 12-crown-4 (2 eq.) was added. The reaction mixture was cooled down to -95/-100 °C before 0.13 mL of *tert*-butyllithium (0.22 mmol, 1.7 mol/L in *n*-hexane) was added. After 5 min 0.05 mL of MeOH (1.2 mmol, exc.) was added and reaction mixture was stirred while warming up to ambient temperature. The crude product **3a** was extracted using Et<sub>2</sub>O (2 times with 2.5 mL) and the solvent removed in vacuo (10<sup>-2</sup> mbar).

**3a:** <sup>1</sup>H NMR (300.1 MHz, 298 K, C<sub>6</sub>D<sub>6</sub>): δ / ppm = 2.99 (<sup>3</sup>J<sub>P,H</sub> = 11.8 Hz, CH<sub>3</sub>, 3H), 6.90-6.94 (m, Ph, 4H), 6.94-6.97 (m, Ph, 4H), 6.97-6.99 (m, Ph, 2H), 7.90 (<sup>1</sup>J<sub>P,H</sub> = 383.3 Hz, PH, 1H). <sup>13</sup>C NMR (75.7 MHz, 298 K, C<sub>6</sub>D<sub>6</sub>): δ / ppm = 59.0 (d,

$^2J_{P,C} = 14.3$  Hz, OCH<sub>3</sub>), 125.8 (s, Ph), 125.9 (s, Ph), 129.8 (s, Ph), 147.9 (d,  $^2J_{P,C} = 2.7$  Hz, *quart*-C), 195.8 (d,  $^2J_{P,C} = 8.3$  Hz, *cis*-CO), 198.8 (d<sub>sat</sub>,  $^1J_{W,P} = 82.6$  Hz  $^2J_{P,C} = 31.2$  Hz, *trans*-CO). **<sup>31</sup>P NMR** (121.5 MHz, 298 K, C<sub>6</sub>D<sub>6</sub>):  $\delta$  / ppm = 112.5 (d<sub>q<sub>sat</sub></sub>,  $^1J_{W,P} = 315.6$  Hz,  $^1J_{P,H} = 383.3$  Hz,  $^3J_{P,H} = 11.8$  Hz). **MS** (EI, 70 eV, <sup>184</sup>W) *m/z* (%) = 555.0 (50) [M]<sup>+</sup>, 527.0 (28) [M-CO]<sup>+</sup>, 471 (100) [M-3CO]<sup>+</sup>, 333.0 (20) [W(CO)<sub>5</sub>]<sup>+</sup>, 168.1 (50) [NPh<sub>2</sub>]<sup>+</sup>. **IR** (ATR diamond):  $\nu$  / cm<sup>-1</sup> = 1908 (vs,  $\nu$ (CO)), 2075 (s,  $\nu$ (CO)), 2661 (m,  $\nu$ (PH)).

**3b:** **<sup>31</sup>P NMR** (121.5 MHz, 298.0 K, THF)  $\delta$ /ppm = 87.9 (d<sub>q<sub>sat</sub></sub>,  $^1J_{W,P} = 303.2$  Hz,  $^1J_{P,H} = 387.7$  Hz,  $^3J_{P,H} = 13.5$  Hz).

*Procedure for the reactions of complexes 1a,b with MeNH<sub>2</sub>.* 0.1 mmol (59 mg (**a**), 61 mg (**b**)) was dissolved in 2.5 mL THF before 32  $\mu$ L of 12-crown-4 (2 eq.) was added. The reaction mixture was cooled down to -95/-100 °C before 0.07 mL of *tert*-butyllithium (0.12 mmol, 1.7 mol/L in *n*-hexane) was added. After 5 min 0.15 mL of MeNH<sub>2</sub> (0.3 mmol, 3 eq., 2 mol/L in THF) was added and the reaction mixture was stirred while warming up to ambient temperature. The desired product was filtered through solid phase ( $\emptyset = 1$  cm, *h* = 3 cm SiO<sub>2</sub>, r.t.) and the Et<sub>2</sub>O was removed in vacuo (5 x 10<sup>-2</sup> mbar). The product was obtained as an orange oil (crude product).

**4a:** **<sup>1</sup>H NMR** (300.1 MHz, 298 K, C<sub>6</sub>D<sub>6</sub>):  $\delta$  / ppm = 2.04 ( $^3J_{P,H} = 11.1$  Hz, CH<sub>3</sub>, 3H), 6.79-6.85 (m, Ph), 6.87-6.98 (m, Ph), 7.4 ( $^1J_{P,H} = 407.0$  Hz,  $^3J_{H,H} = 8.5$  Hz, PH, 1H). **<sup>13</sup>C{<sup>1</sup>H} NMR** (75.6 MHz, 298 K, C<sub>6</sub>D<sub>6</sub>):  $\delta$  / ppm = 26.9 (d,  $^3J_{P,C} = 1.7$  Hz, NCH<sub>2</sub>CH<sub>3</sub>), 33.6 (d,  $^2J_{P,C} = 10.5$  Hz, NCH<sub>2</sub>), 124.7 (s, Ph), 125.3 (d,  $^3J_{P,C} = 4.0$  Hz, Ph), 129.3 (s, Ph), 148.0 (d,  $^2J_{P,C} = 3.0$  Hz, *quart*-C), 195.9 (d,  $^2J_{P,C} = 7.7$  Hz, *cis*-CO), 198.5 (d,  $^2J_{P,C} = 26.1$ , *trans*-CO). **<sup>31</sup>P NMR** (121.5 MHz, 298 K, C<sub>6</sub>D<sub>6</sub>):  $\delta$  / ppm = 67.6 (dd<sub>q<sub>sat</sub></sub>,  $^1J_{W,P} = 281.3$  Hz,  $^1J_{P,H} = 407.0$  Hz,  $^2J_{P,H} = 22.1$  Hz,  $^3J_{P,H} = 11.1$  Hz). **MS** (EI, 70 eV, <sup>184</sup>W) *m/z* (%) = 554.0 (9) [M]<sup>+</sup>, 526.0 (1) [M-CO]<sup>+</sup>, 470.0 (3) [M-3CO]<sup>+</sup>, 414.0 (2) [M-5CO]<sup>+</sup>, 229.1 (6) [M-W(CO)<sub>5</sub>-H]<sup>+</sup>, 168.1 (25) [NPh<sub>2</sub>]<sup>+</sup>. **IR** (ATR diamond):  $\nu$  / cm<sup>-1</sup> = 1901.2 (vs,  $\nu$ (CO)), 1982.3 (m,  $\nu$ (CO)), 2071.6 (s,  $\nu$ (CO)), 2861.2 (m,  $\nu$ (PH)), 3320.3 (w  $\nu$ (NH)).

*Procedure for the reactions of 1a,b with toluene.* 0.1 mmol (59 mg (**a**), 61 mg (**b**)) was dissolved in 2 mL toluene before 90 mg (0.5 mmol) toluene was added. The reaction mixture was cooled down to -80/-85°C before 0.13 mL of *tert*-Butyllithium (0.2 mmol, 1.7 mol/L in *n*-hexane) was added and the reaction mixture was stirred while warming up to ambient temperature and was then filtered through wet silica (2 cm). After removal of the solvent under vacuum (10<sup>-2</sup> mbar) the complexes were obtained as orange oils.

**6a:** **<sup>31</sup>P NMR** (121.5 MHz, 298.0 K, THF)  $\delta$ /ppm = -108.3 ( $^1J_{W,P} = 305.3$  Hz). **MS** (EI, 70 eV, <sup>184</sup>W, 180°C) *m/z* (%) = 701.1 (10) [M]<sup>+</sup>, 617-1 (8) [M-3CO]<sup>+</sup>, 533.0 (7) [M-NPh<sub>2</sub>]<sup>+</sup>, 505.0 (3) [M-NPh<sub>2</sub>-CO]<sup>+</sup>, 477.0 (4) [M-NPh<sub>2</sub>-2CO]<sup>+</sup>, 449.0 (22) [M-NPh<sub>2</sub>-3CO]<sup>+</sup>, 393.0 (13) [M-NPh<sub>2</sub>-5CO]<sup>+</sup>, 209.1 (30) [M-NPh<sub>2</sub>-W(CO)<sub>5</sub>]<sup>+</sup>, 178.1 (70) [C<sub>2</sub>Ph<sub>2</sub>]<sup>+</sup>, 168.1 (50) [NPh<sub>2</sub>]<sup>+</sup> (50).

**6b:** **<sup>1</sup>H NMR** (300.1 MHz, 298.0 K, C<sub>6</sub>D<sub>6</sub>)  $\delta$ /ppm = 0.64-0.80 (Cy, 2H), 0.89-0.98 (Cy, 2H), 1.10-1.20 (Cy, 4H), 1.51-1.61 (Cy, 4H), 1.62-1.72 (Cy, 4H), 3.12-3.29 ( $^3J_{P,H} = 15.3$  Hz, NCH, 2H), 6.94 – 7.05 (m, Ph), 7.47 – 7.54 (m, Ph), 7.84 – 7.89 (m, Ph) **<sup>13</sup>C{<sup>1</sup>H} NMR** (75.8 MHz, 298.0 K, C<sub>6</sub>D<sub>6</sub>)  $\delta$ /ppm = 25.7 (Cy), 27.0 (Cy), 34.5 (d,  $^3J_{P,C} = 3.2$  Hz, NCHCH<sub>2</sub>), 58.0 (d,  $^2J_{P,C} = 6.7$  Hz, NCH), 129.5 (Ph), 129.8 (d,  $^2J_{P,C} = 4.4$  Hz, PCC<sub>Ph</sub>), 130.5 (Ph), 146.2 (d,  $^1J_{P,C} = 16.8$  Hz, PC), 197.5 (d,  $^2J_{P,C} = 9.1$  Hz, *cis*-CO), 199.3 (d,  $^2J_{P,C} = 33.9$  Hz, *trans*-CO). **<sup>31</sup>P NMR** (121.5 MHz, 298.0 K, C<sub>6</sub>D<sub>6</sub>)  $\delta$ /ppm = -115.3 (t<sub>sat</sub>,  $^1J_{W,P} = 306.1$  Hz,  $^2J_{P,H} = 15.6$  Hz). **MS** (EI, 70 eV, <sup>184</sup>W) *m/z* (%) = 713.1 (0.1) [M]<sup>+</sup>, 535.0 (28) [M-Ph<sub>2</sub>C<sub>2</sub>]<sup>+</sup>, 507 (53) [M-Ph<sub>2</sub>C<sub>2</sub>-CO]<sup>+</sup>, 178 (100) [Ph<sub>2</sub>C<sub>2</sub>]<sup>+</sup>.

*Procedure for the reactions of 1b with 1-pentene/1-hexene.* 61 mg (0.1 mmol) of **1b** was dissolved in 2 mL toluene before 0.5 mmol (70 mg 1-pentene (**7b**), 84 mg 1-hexene (**8b**)) was added. The reaction mixture was cooled down to -80/-85°C before 0.13 mL of *tert*-Butyllithium (0.2 mmol, 1.7 mol/L in *n*-hexane) was added and the reaction mixture was stirred while warming up to ambient temperature and was then filtered through wet silica (2 cm). After removal of the solvent under vacuum (10<sup>-2</sup> mbar) the complexes were obtained as orange oils.

**7b:** **<sup>1</sup>H NMR** (500.1 MHz, 298.0 K, C<sub>6</sub>D<sub>6</sub>)  $\delta$ /ppm = 0.53 (td,  $^3J_{H,H} = 8.4$  Hz,  $^2J_{P,H} = 6.8$  Hz, 1H, PCH), 0.93 (t,  $^3J_{H,H} = 7.2$  Hz, 3H, CH<sub>3</sub>), 1.03-1.13 (m, 4H, NCHCH<sub>2</sub>), 1.13-1.22 (m, 4H, NCHCH<sub>2</sub>), 1.24-1.34 (m, 4H, NCHCH<sub>2</sub>CH<sub>2</sub>CH<sub>2</sub>), 1.35-1.46 (m, 6H, NCHCH<sub>2</sub>CH<sub>2</sub>), 1.41-1.44 (m,  $^3J_{P,H} = 3.8$  Hz, 2H, CHCH<sub>2</sub>), 1.53-1.56 (m, 2H, CHCH<sub>2</sub>CH<sub>2</sub>), 1.64-1.67 (m, 2H, PCH<sub>2</sub>), 1.84-1.92 (m, 2H, NCHCH<sub>2</sub>CH<sub>2</sub>), 2.67-2.77 (m, 2H, NCH). **<sup>13</sup>C{<sup>1</sup>H} NMR** (125.5 MHz, 298.0 K, C<sub>6</sub>D<sub>6</sub>)  $\delta$ /ppm = 14.0 (s, CH<sub>3</sub>), 23.0 (d,  $^3J_{P,C} = 6.7$  Hz, CH<sub>2</sub>CH<sub>2</sub>CH<sub>3</sub>), 23.4 (d,  $^1J_{P,C} = 17.5$  Hz, PCH), 26.8 (d,  $^3J_{P,C} = 7.1$  Hz, NCHCH<sub>2</sub>), 31.7 (d,  $^1J_{P,C} = 21.1$  Hz, PCH<sub>2</sub>), 33.6 (d,  $^4J_{P,C} = 3.3$  Hz, NCHCH<sub>2</sub>CH<sub>2</sub>), 34.0 ( $^2J_{P,C} = 3.4$  Hz, CH<sub>2</sub>CH<sub>2</sub>CH<sub>3</sub>), 35.3 (d,  $^5J_{P,C} = 1.5$  Hz, NCHCH<sub>2</sub>CH<sub>2</sub>CH<sub>2</sub>), 60.3 (d,  $^2J_{P,C} = 3.9$  Hz, NCH), 197.7 (d<sub>sat</sub>,  $^2J_{P,C} = 8.8$  Hz,  $^1J_{W,C} = 126.8$  Hz, *cis*-CO), 198.9 (d,  $^2J_{P,C} = 32.0$  Hz, *trans*-CO). **<sup>31</sup>P{<sup>1</sup>H} NMR** (202.1 MHz, 298.0 K, C<sub>6</sub>D<sub>6</sub>)  $\delta$ /ppm = -108.1 (s<sub>sat</sub>,  $^1J_{W,P} = 287.0$  Hz), -111.1 (s<sub>sat</sub>,  $^1J_{W,P} = 281.8$  Hz) [83:17]. **<sup>31</sup>P NMR** (202.1 MHz, 298.0 K, C<sub>6</sub>D<sub>6</sub>)  $\delta$ /ppm = -108.1 (br. s<sub>sat</sub>,  $^1J_{W,P} = 287.0$ , FWHM ~54 Hz), -111.1 (br. s FWHM ~49). **MS** (EI, 70 eV, <sup>184</sup>W) *m/z* (%) = 507.0 (1.2) [M-CO-C<sub>5</sub>H<sub>10</sub>]<sup>+</sup>, 323.9 (5) [W(CO)<sub>5</sub>]<sup>+</sup>, 295.9 (1) [W(CO)<sub>4</sub>]<sup>+</sup>, 267.9 (4) [W(CO)<sub>3</sub>]<sup>+</sup>, 239.9 (3) [W(CO)<sub>2</sub>]<sup>+</sup>. **IR** (ATR Diamant):  $\nu$  / cm<sup>-1</sup> = 1904.7 (vs,  $\nu$ (CO)), 1978.7 (m,  $\nu$ (CO)), 2068.1 (s,  $\nu$ (CO)), 2854.9 (m,  $\nu$ (CH)), 2929.8 (s,  $\nu$ (CH)). **Anal. calc.** for C<sub>22</sub>H<sub>32</sub>NO<sub>5</sub>PW, C 43.65 H 5.33 N 2.31; **found** C 42.85 H 5.09 N 2.18.

**8b:** **<sup>1</sup>H NMR** (300.1 MHz, 298 K, C<sub>6</sub>D<sub>6</sub>):  $\delta$  / ppm = 0.53 (m,  $^3J_{H,H} = 7.7$  Hz,  $^2J_{P,H} = 7.6$  Hz, 1H, PCH), 0.92 (t,  $^3J_{H,H} = 7.2$  Hz, 3H, CH<sub>3</sub>), 1.07-1.26 (m, xH, NCHCH<sub>2</sub>), 1.23-1.39 (m, 2H, CHCH<sub>2</sub>CH<sub>2</sub>CH<sub>2</sub>), 1.34-1.53 (m, NCHCH<sub>2</sub>CH<sub>2</sub>CH<sub>2</sub>), 1.40-1.52 (m, 6H, NCHCH<sub>2</sub>CH<sub>2</sub>), 1.48-1.58 (m, 2H, CHCH<sub>2</sub>), 1.55-1.70 (m, 2H, CHCH<sub>2</sub>CH<sub>2</sub>), 1.57-1.72 (m, 2H, PCH<sub>2</sub>), 1.60-1.73 (m, xH,

NCHCH<sub>2</sub>), 1.84-1.95 (m, 2H, NCHCH<sub>2</sub>CH<sub>2</sub>), 2.64-2.81 (m, 2H, NCH). **<sup>13</sup>C{<sup>1</sup>H} NMR** (75.5 MHz, 298 K, C<sub>6</sub>D<sub>6</sub>): δ / ppm = 14.2 (s, CH<sub>3</sub>), 22.8 (s, CH<sub>2</sub>CH<sub>2</sub>CH<sub>3</sub>), 22.8 (s, PCH), 25.9 (s, CHCH<sub>2</sub>CH<sub>2</sub>), 25.9 (s, CHCH<sub>2</sub>), 26.8 (d, <sup>3</sup>J<sub>P,C</sub> = 4.1 Hz, NCHCH<sub>2</sub>), 31.6 (d, <sup>4</sup>J<sub>P,C</sub> = 3.3 Hz, NCHCH<sub>2</sub>CH<sub>2</sub>), 32.0 (d, <sup>1</sup>J<sub>P,C</sub> = 14.0 Hz, PCH<sub>2</sub>), 33.6 (<sup>4</sup>J<sub>P,C</sub> = 3.5 Hz, NCH<sub>2</sub>CH<sub>2</sub>CH<sub>2</sub>), 35.3 (d, <sup>5</sup>J<sub>P,C</sub> = 1.8 Hz, NCHCH<sub>2</sub>CH<sub>2</sub>CH<sub>2</sub>), 60.4 (d, <sup>2</sup>J<sub>P,C</sub> = 4.1 Hz, NCH), 197.8 (d<sub>sat</sub>, <sup>2</sup>J<sub>P,C</sub> = 8.9 Hz), 198.9 (d, <sup>2</sup>J<sub>P,C</sub> = 32.0 Hz, *trans*-CO). **<sup>31</sup>P{<sup>1</sup>H} NMR** (202.1 MHz, 298.0 K, C<sub>6</sub>D<sub>6</sub>) δ/ppm = -107.8 (s<sub>sat</sub>, <sup>1</sup>J<sub>W,P</sub> = 287.6 Hz), -110.4 (s<sub>sat</sub>, <sup>1</sup>J<sub>W,P</sub> = 281.8 Hz) [83:17]. **<sup>31</sup>P NMR** (202.1 MHz, 298.0 K, C<sub>6</sub>D<sub>6</sub>) δ/ppm = -107.8 (br. s<sub>sat</sub>, <sup>1</sup>J<sub>W,P</sub> = 287.6, FWHM ~51 Hz), -110.4 (br. s, FWHM ~37 Hz). **MS** (EI, 70 eV, <sup>184</sup>W) m/z (%) = 536.1 (3) [M-Cy]<sup>+</sup>, 508.1 (2) [M-Cy-CO]<sup>+</sup>, 354.9 (1) [W(CO)<sub>5</sub>-P]<sup>+</sup>, 295.2 (2) [M-W(CO)<sub>5</sub>]<sup>+</sup>, 267.9 (4) [W(CO)<sub>3</sub>]<sup>+</sup>, 239.9 (2) [W(CO)<sub>2</sub>]<sup>+</sup>, 212.2 (4) [M-W(CO)<sub>5</sub>-Cy]<sup>+</sup>, 84.1 (17) [C<sub>6</sub>H<sub>12</sub>]<sup>+</sup>, 56.1 (45) [C<sub>4</sub>H<sub>8</sub>]<sup>+</sup>. **IR** (ATR diamond): ν / cm<sup>-1</sup> = 2929 (m, ν(CH)), 2855 (m, ν(CH)), 2068 (s, ν(CO)), 1978 (s, ν(CO)), 1904 (vs, ν(CO)). **Anal. calc.** for C<sub>23</sub>H<sub>34</sub>NO<sub>5</sub>PW, C 44.60 H 5.53 N 2.26; **found** C 44.78 H 5.65 N 2.45.

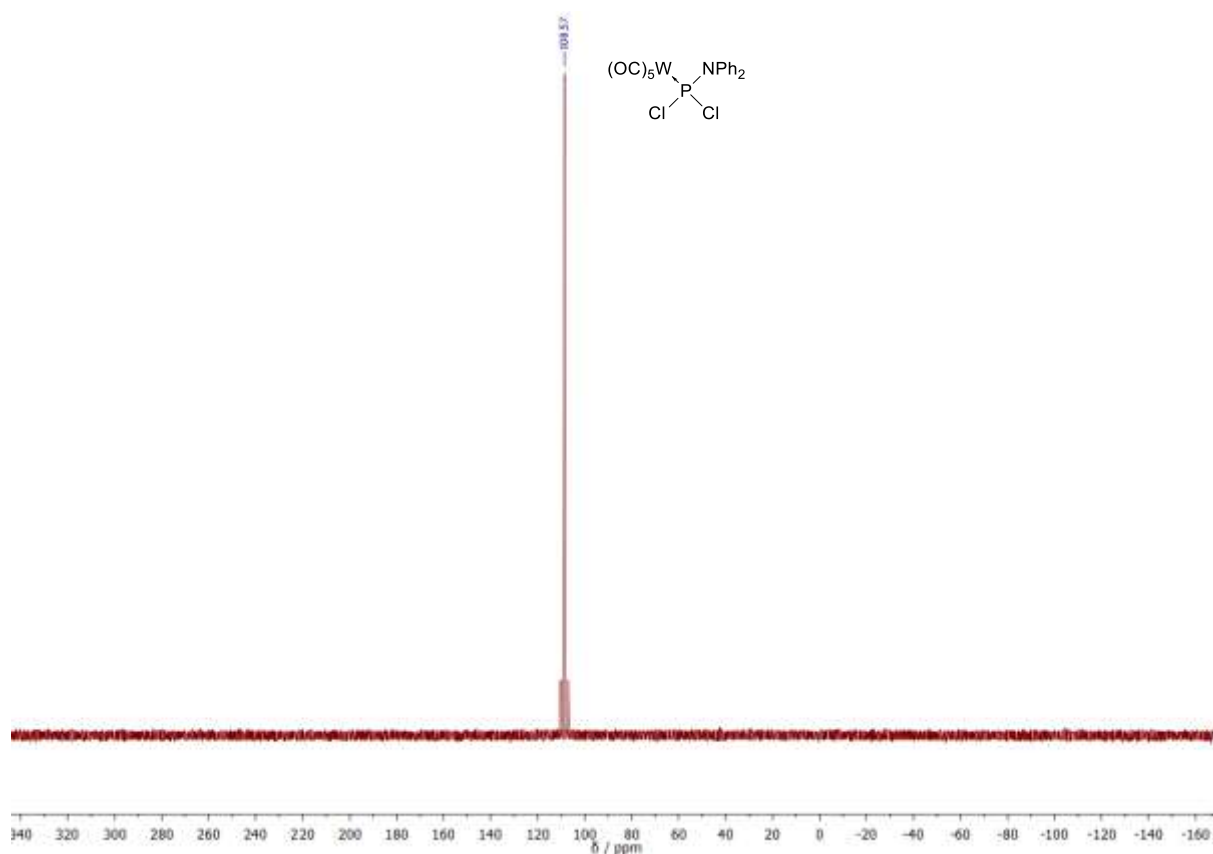

Figure S1:  $^{31}P\{^1H\}$  NMR spectrum of **1a** in  $C_6D_6$  at 121.5 MHz.

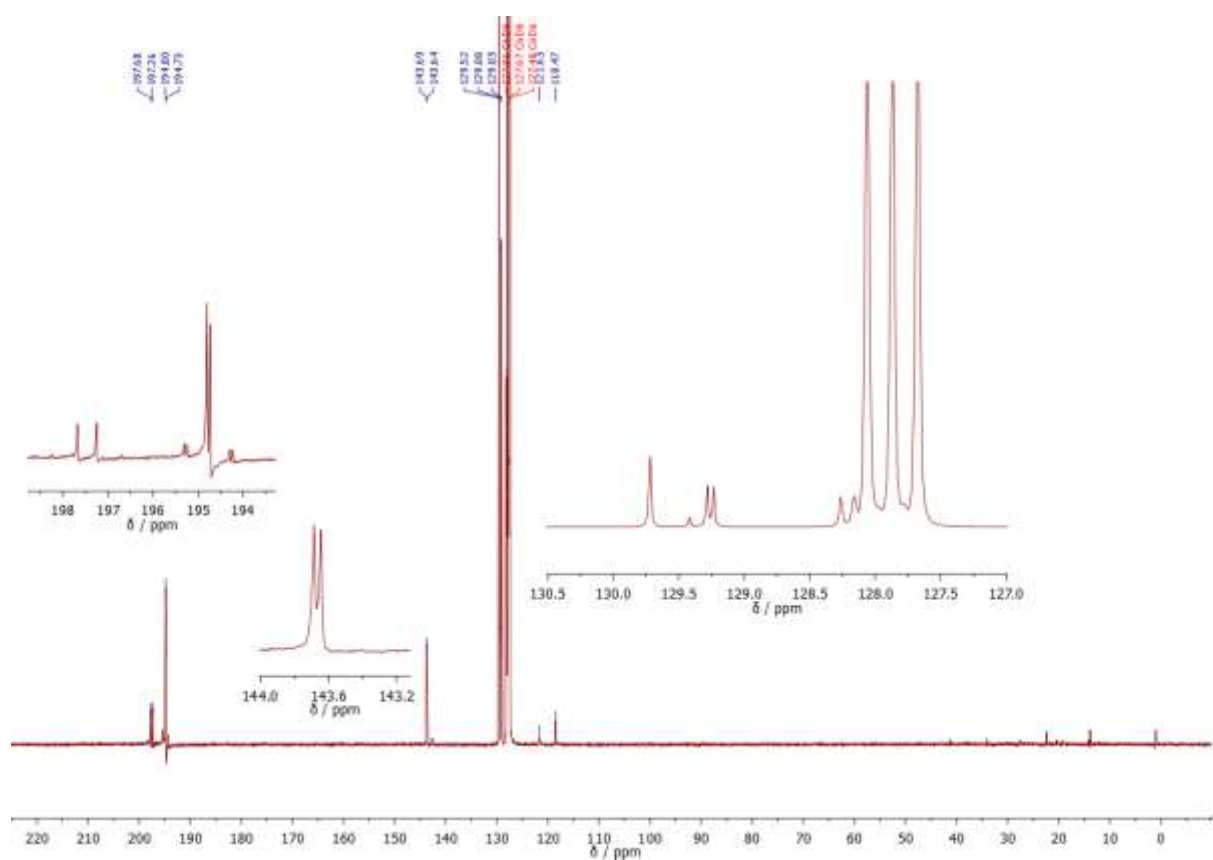

Figure S2:  $^{13}C\{^1H\}$  NMR Spectrum of **1a** in  $C_6D_6$  at 121.5 MHz.

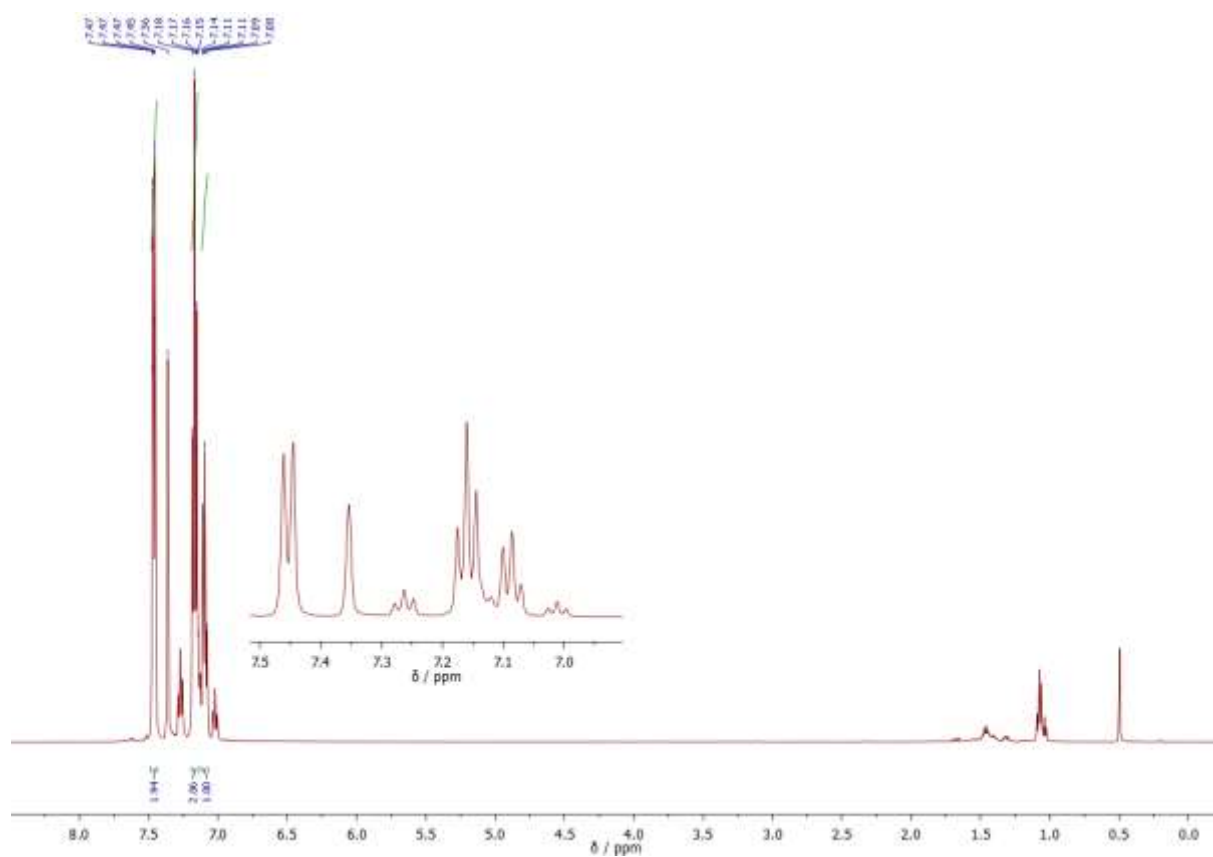

Figure S3:  $^1\text{H}$  NMR Spectrum of **1a** in  $\text{C}_6\text{D}_6$  at 500.1 MHz.

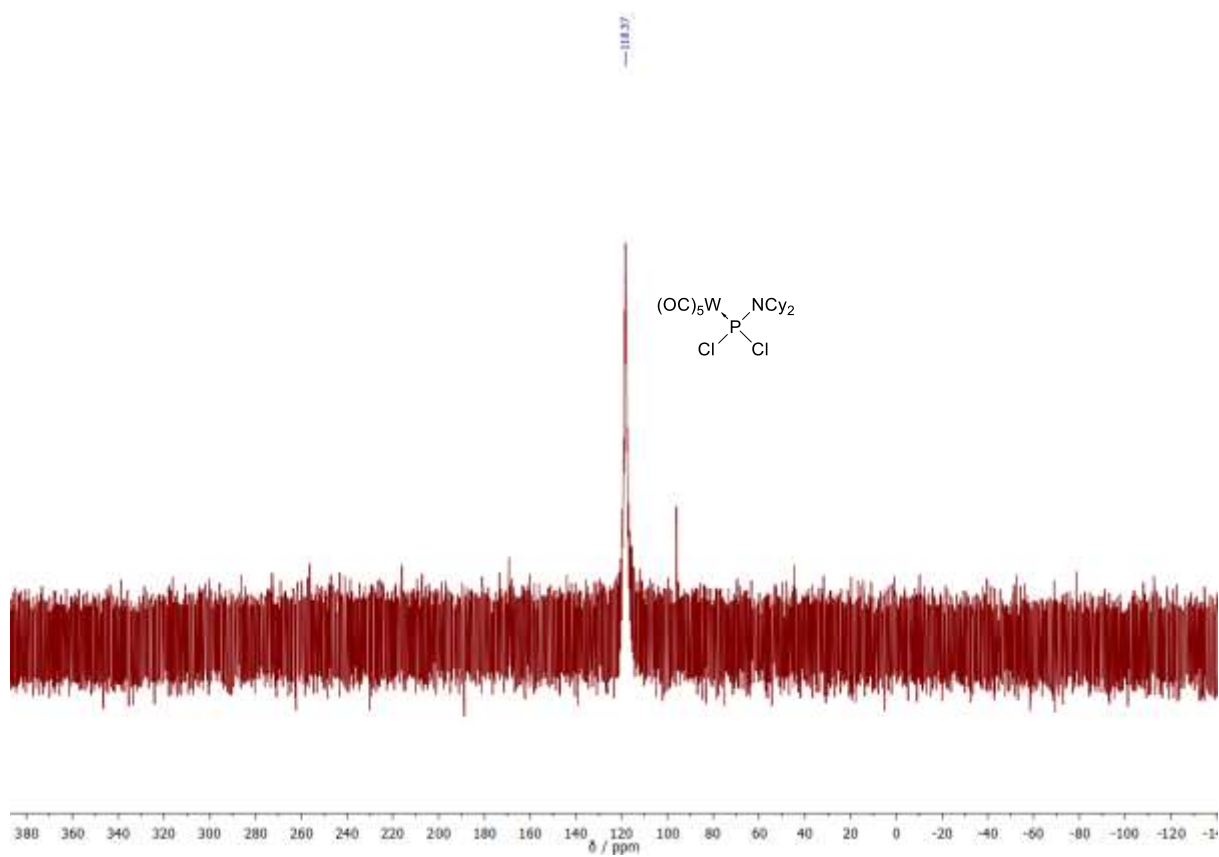

Figure S4:  $^{31}\text{P}\{^1\text{H}\}$  NMR spectrum of **1b** in  $\text{C}_6\text{D}_6$  at 162.0 MHz.

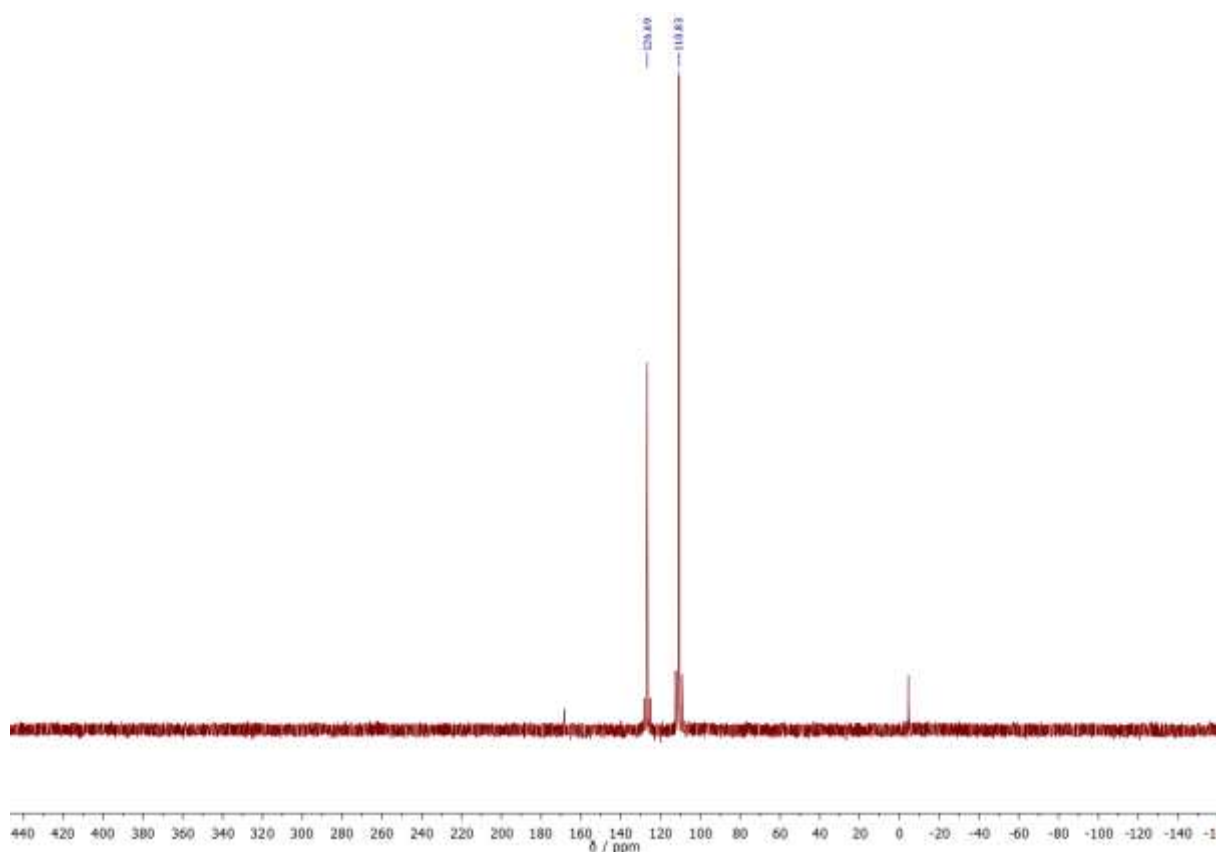

Figure S4':  $^{31}\text{P}\{^1\text{H}\}$  NMR spectrum of **1b** at  $-60^\circ\text{C}$  in THF at 121.0 MHz

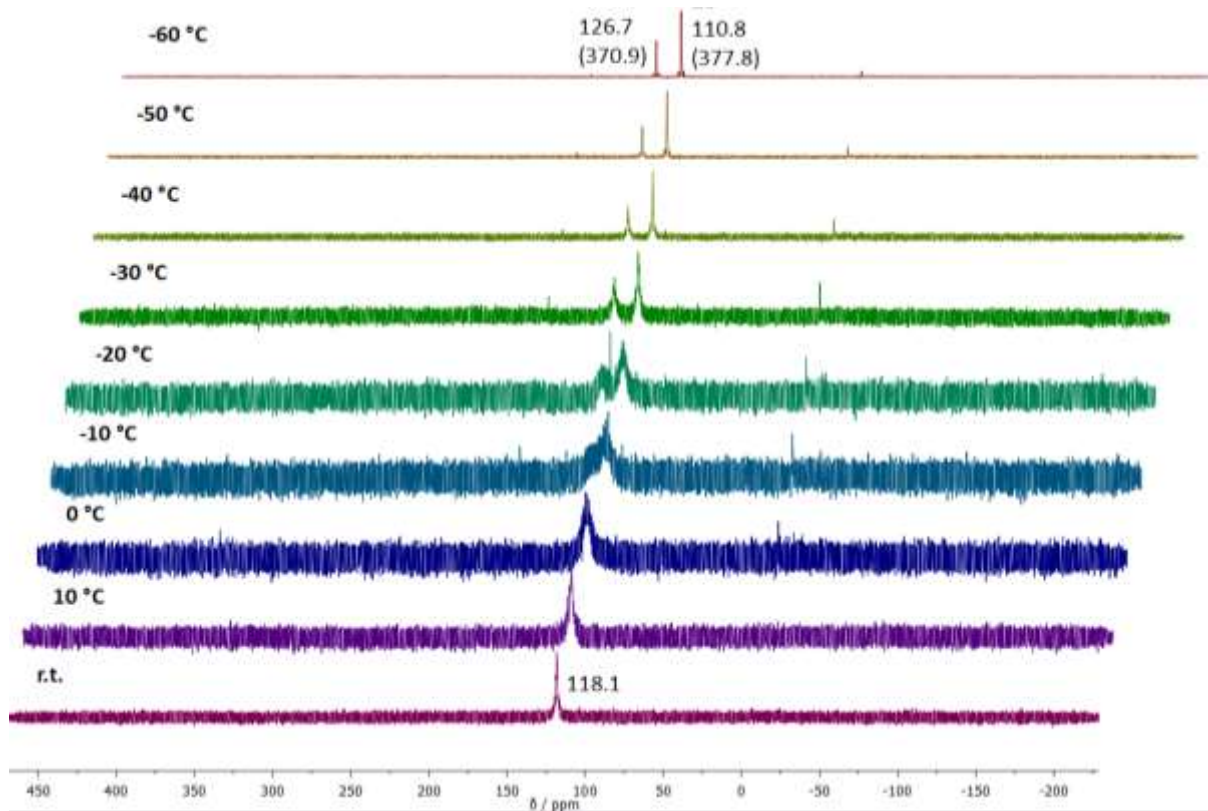

Figure S4'':  $^{31}\text{P}\{^1\text{H}\}$  VT-NMR spectra of **1b** starting at  $-60^\circ\text{C}$  in THF at 121.0 MHz. With the coalescence Temperature ( $T_c$ ) taken at  $-10^\circ\text{C}$ , a Gibbs free energy rotation barrier of 7.3 kcal/mol could be calculated.



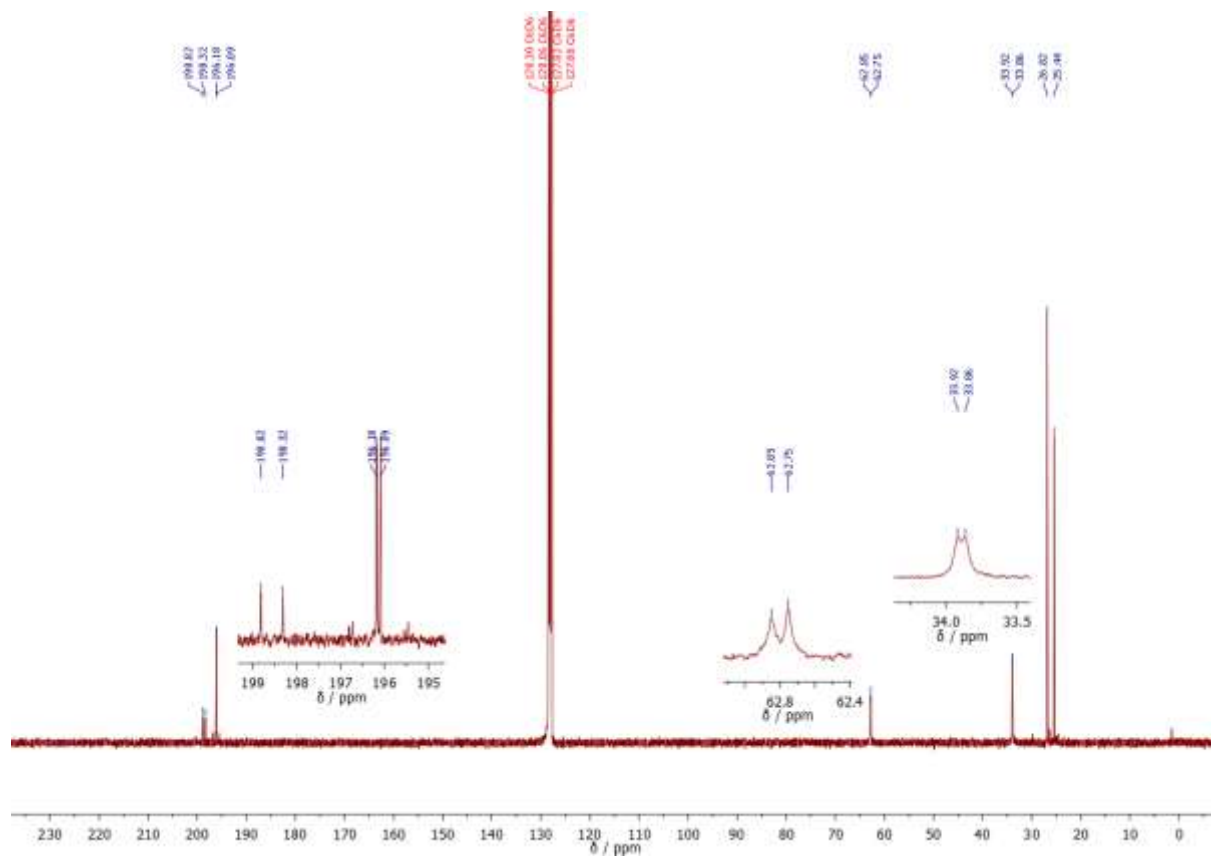

Figure S5:  $^{13}\text{C}\{^1\text{H}\}$  NMR spectrum of **1b** in  $\text{C}_6\text{D}_6$  at 100.6 MHz.

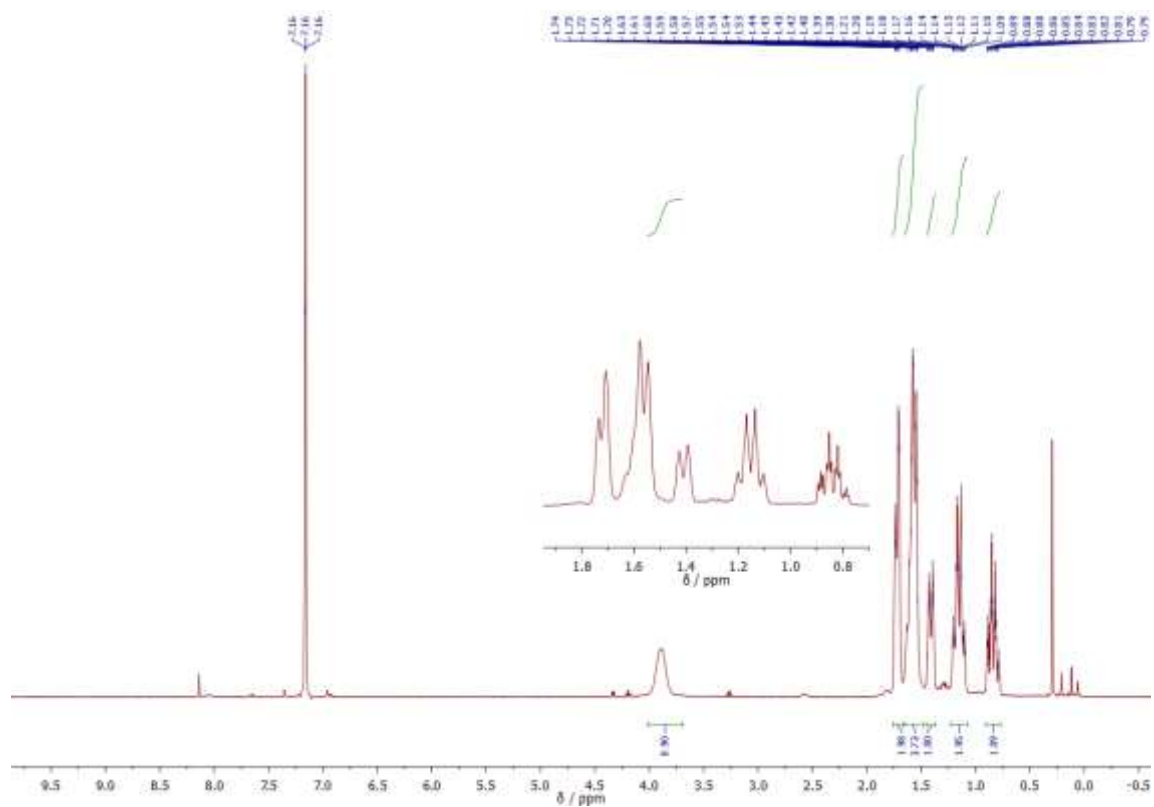

Figure S6:  $^1\text{H}$  NMR spectrum of **1b** in  $\text{C}_6\text{D}_6$  at 400.1 MHz.

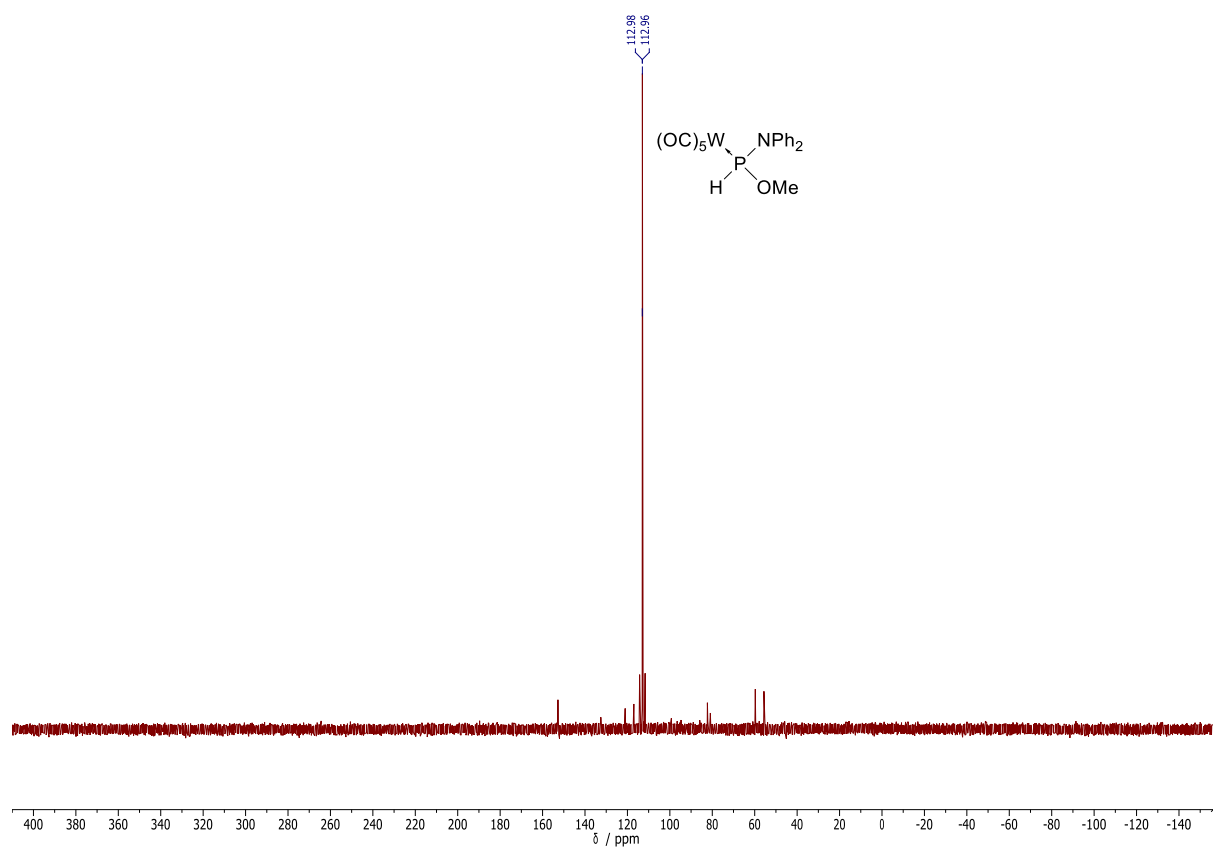

Figure S7:  $^{31}\text{P}\{^1\text{H}\}$  NMR spectrum of **3a** in THF at 121.5 MHz.

Figure S8:  $^{31}\text{P}$  NMR spectrum of **3a** in THF at 121.5 MHz.

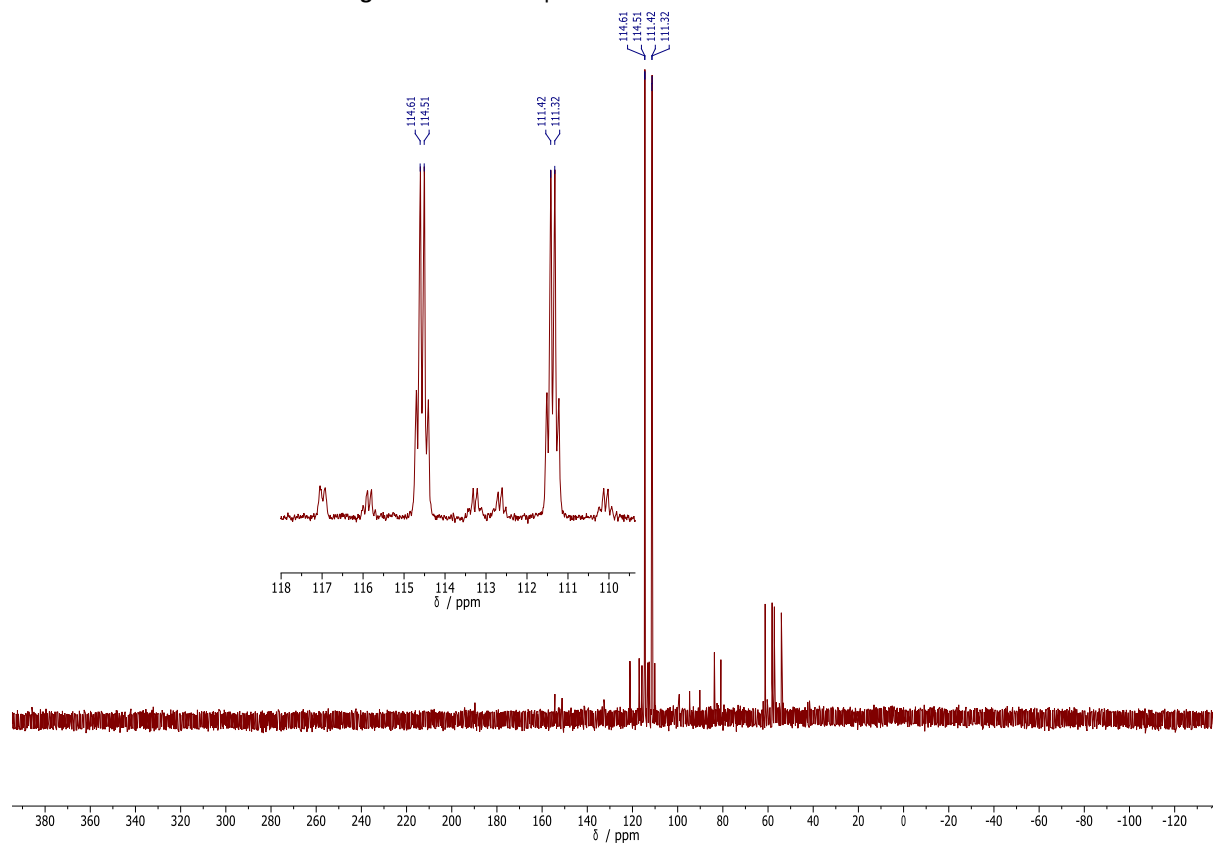

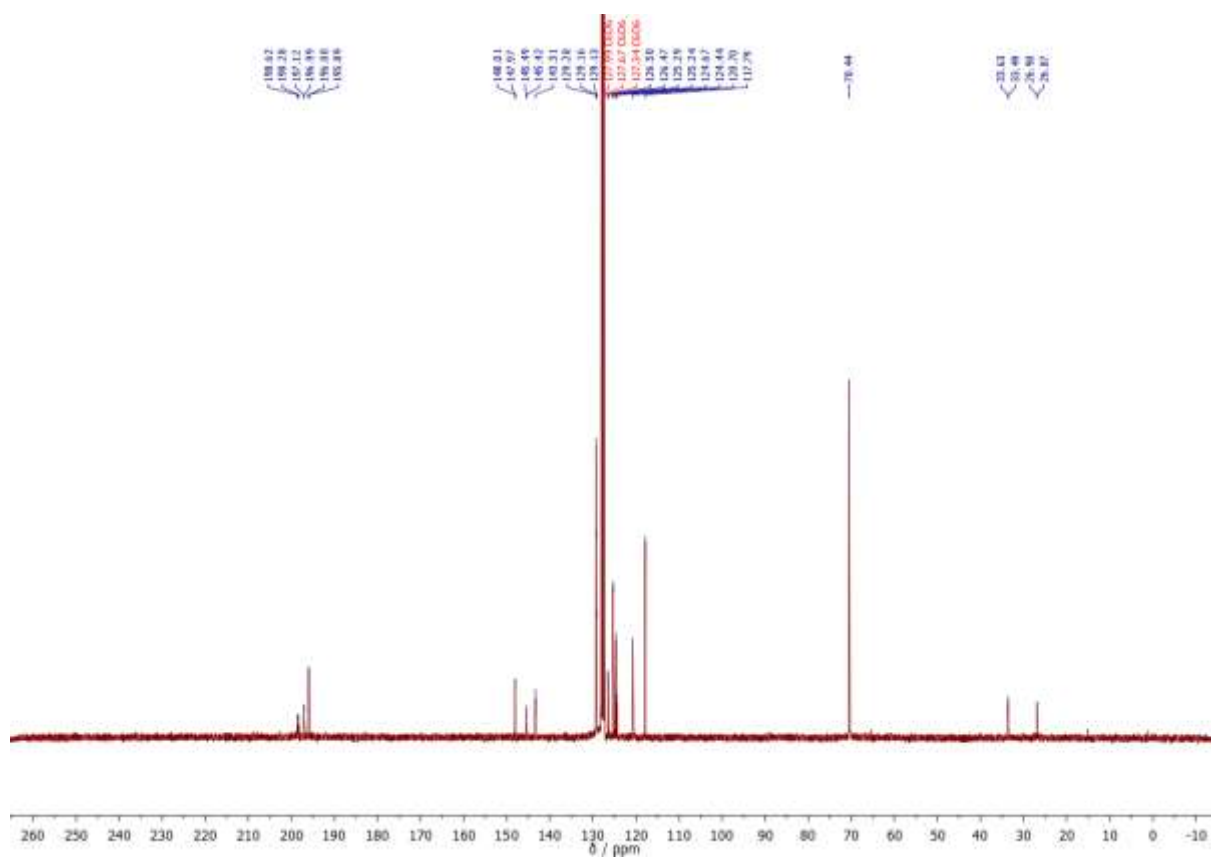

Figure S9:  $^{13}\text{C}\{^1\text{H}\}$  NMR spectrum of **3a** in  $\text{C}_6\text{D}_6$  at 75.5 MHz.

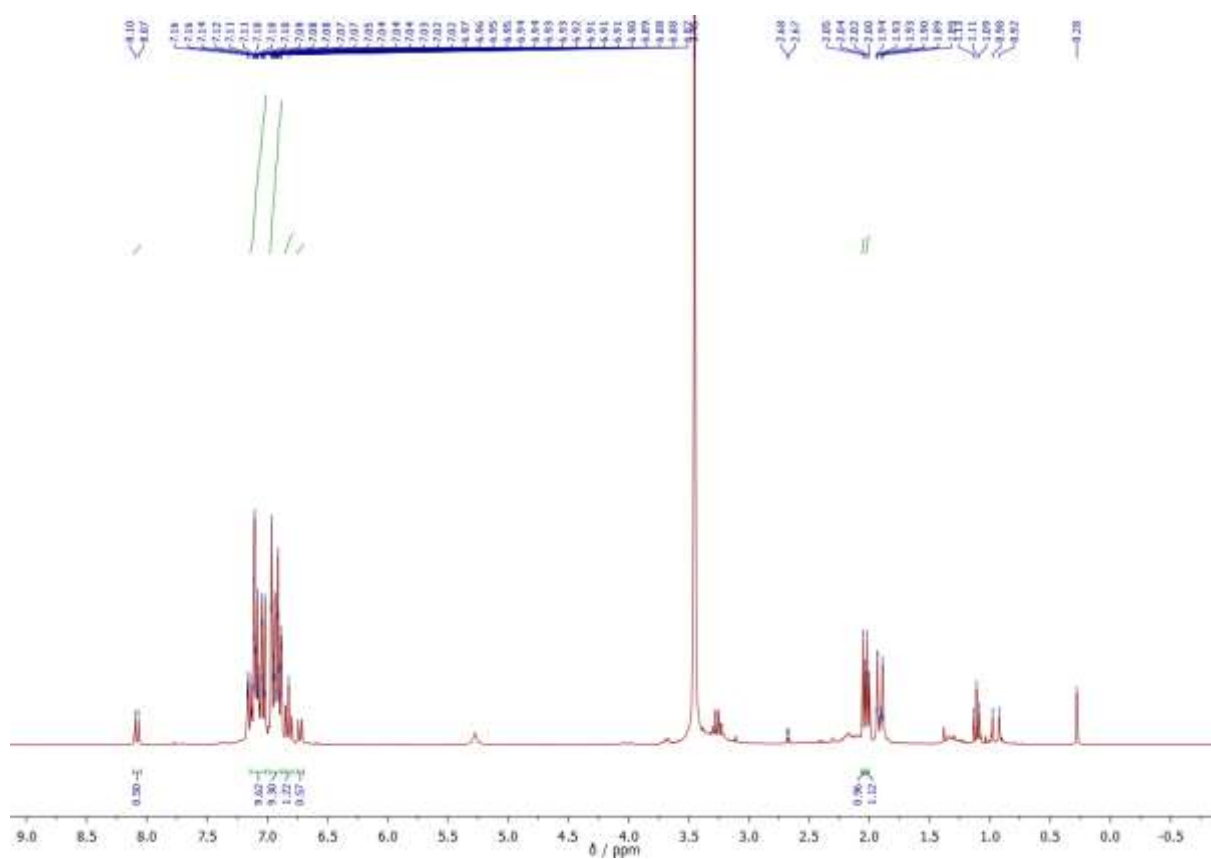

Figure S10:  $^1\text{H}$  NMR spectrum of **3a** in  $\text{C}_6\text{D}_6$  at 300.1 MHz.

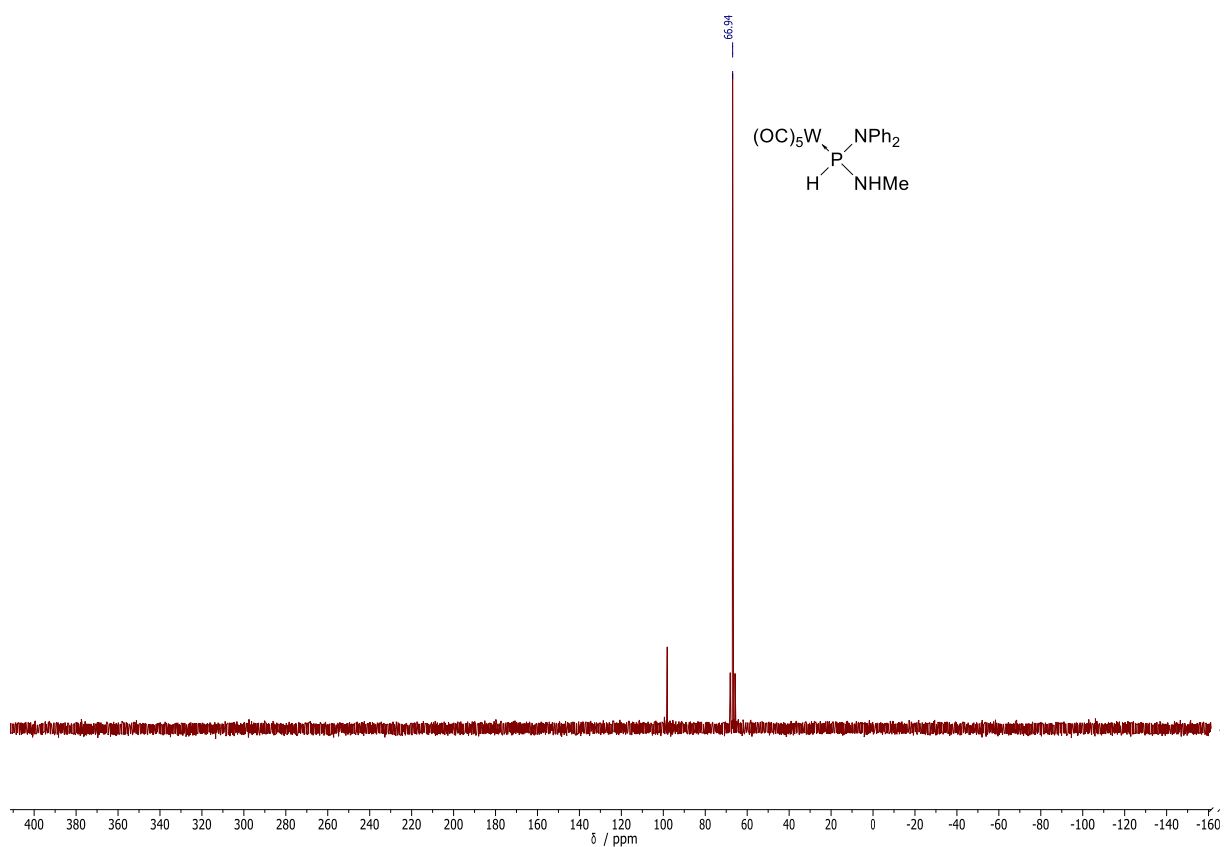

Figure S11:  $^{31}\text{P}\{^1\text{H}\}$  NMR spectrum of **4a** in THF at 121.5 MHz.

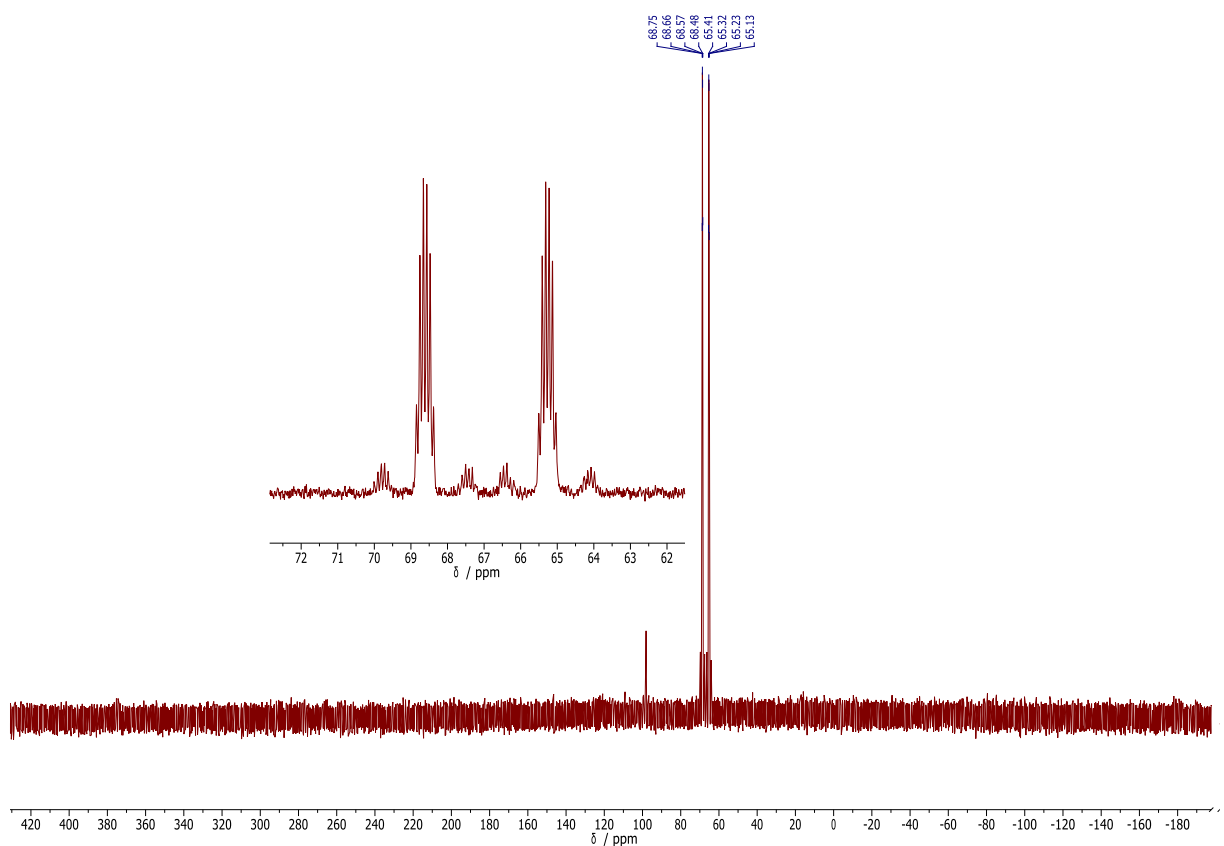

Figure S12:  $^{31}\text{P}$  NMR spectrum of **4a** in THF at 121.5 MHz.

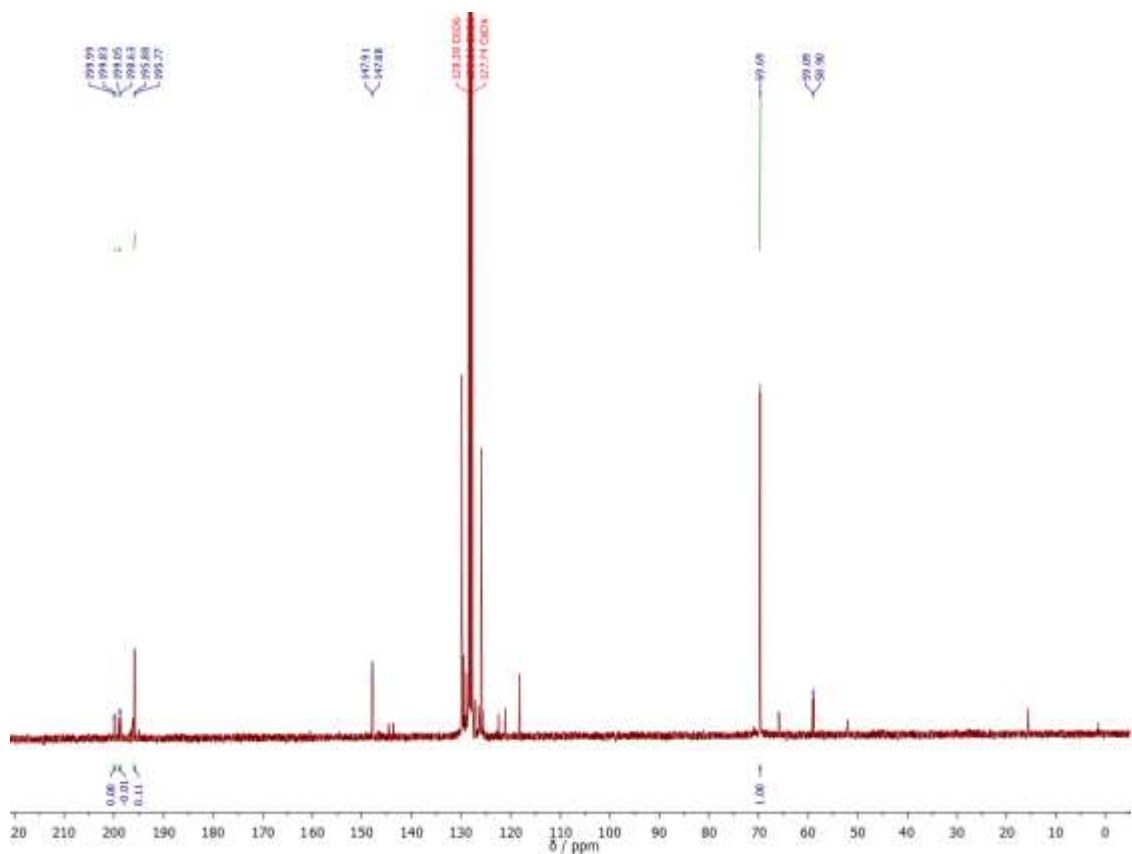

Figure S13:  $^{13}\text{C}\{^1\text{H}\}$  NMR spectrum of **4a** in  $\text{C}_6\text{D}_6$  at 75.5 MHz.

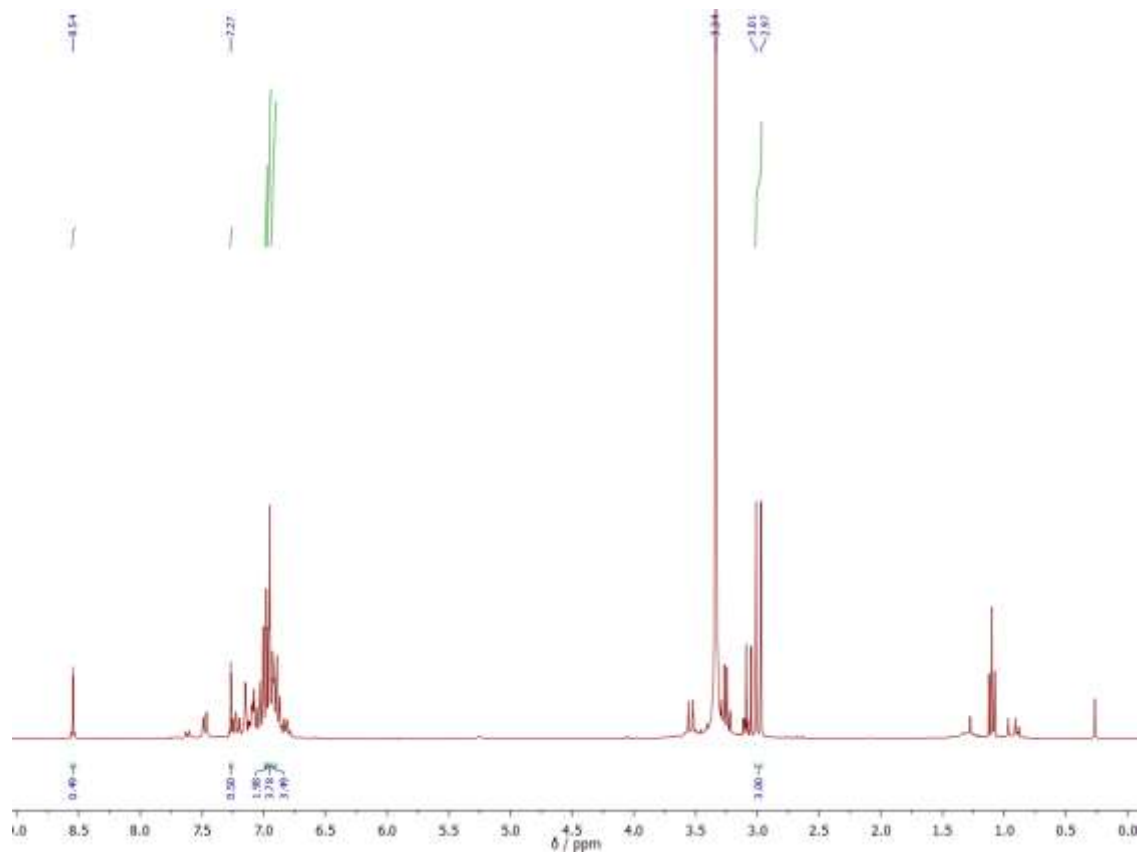

Figure S14:  $^1\text{H}$  NMR spectrum of **4a** in  $\text{C}_6\text{D}_6$  at 300.1 MHz.





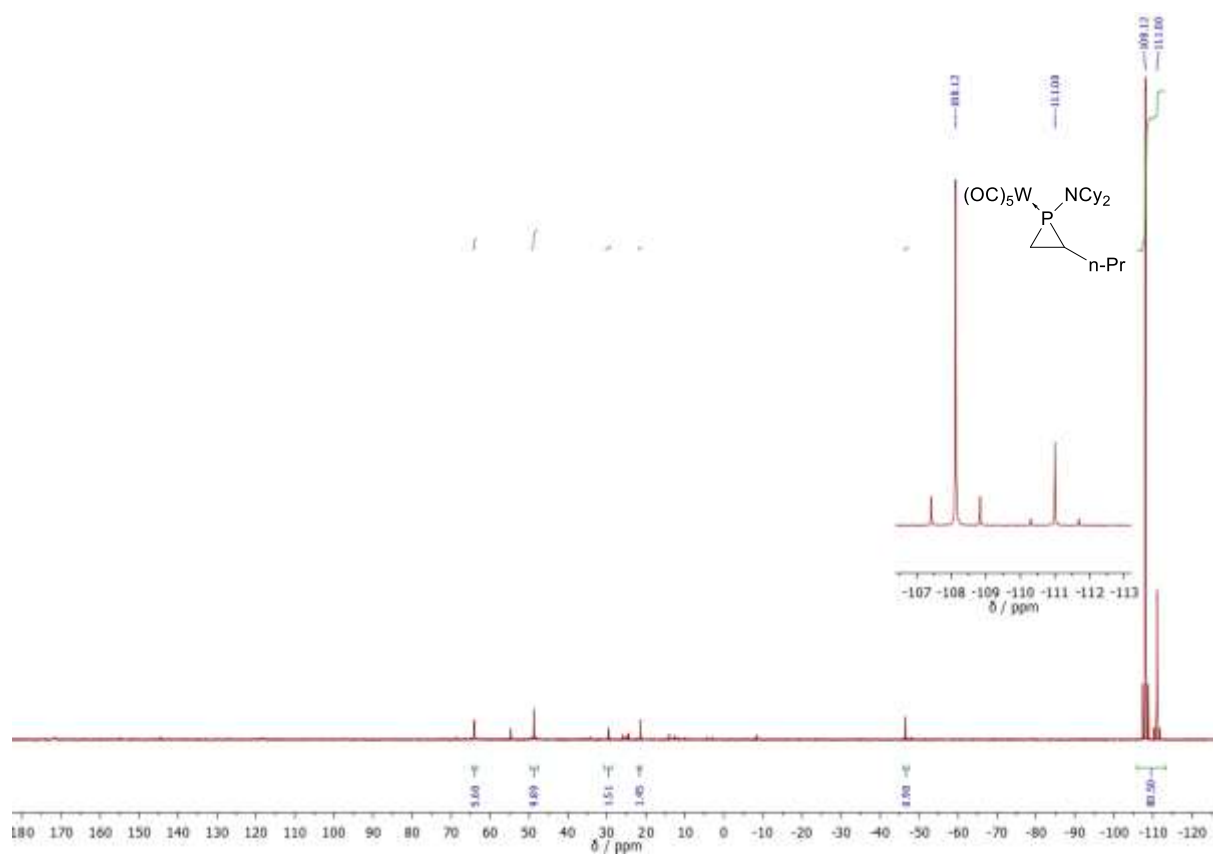

Figure S19.  $^{31}\text{P}\{^1\text{H}\}$  NMR spectrum of **7b** in  $\text{C}_6\text{D}_6$  at 202.1 MHz.

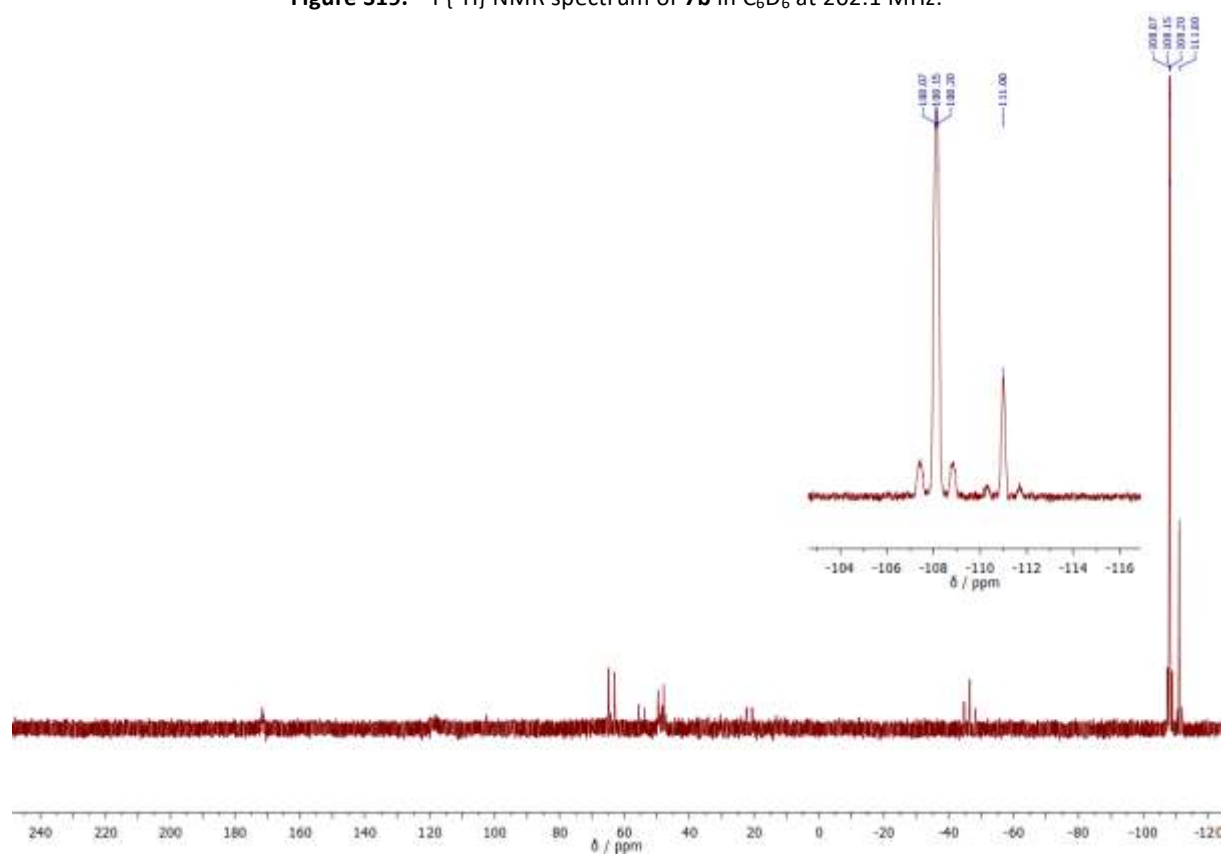

Figure S20.  $^{31}\text{P}$  NMR spectrum of **7b** in  $\text{C}_6\text{D}_6$  at 202.1 MHz.





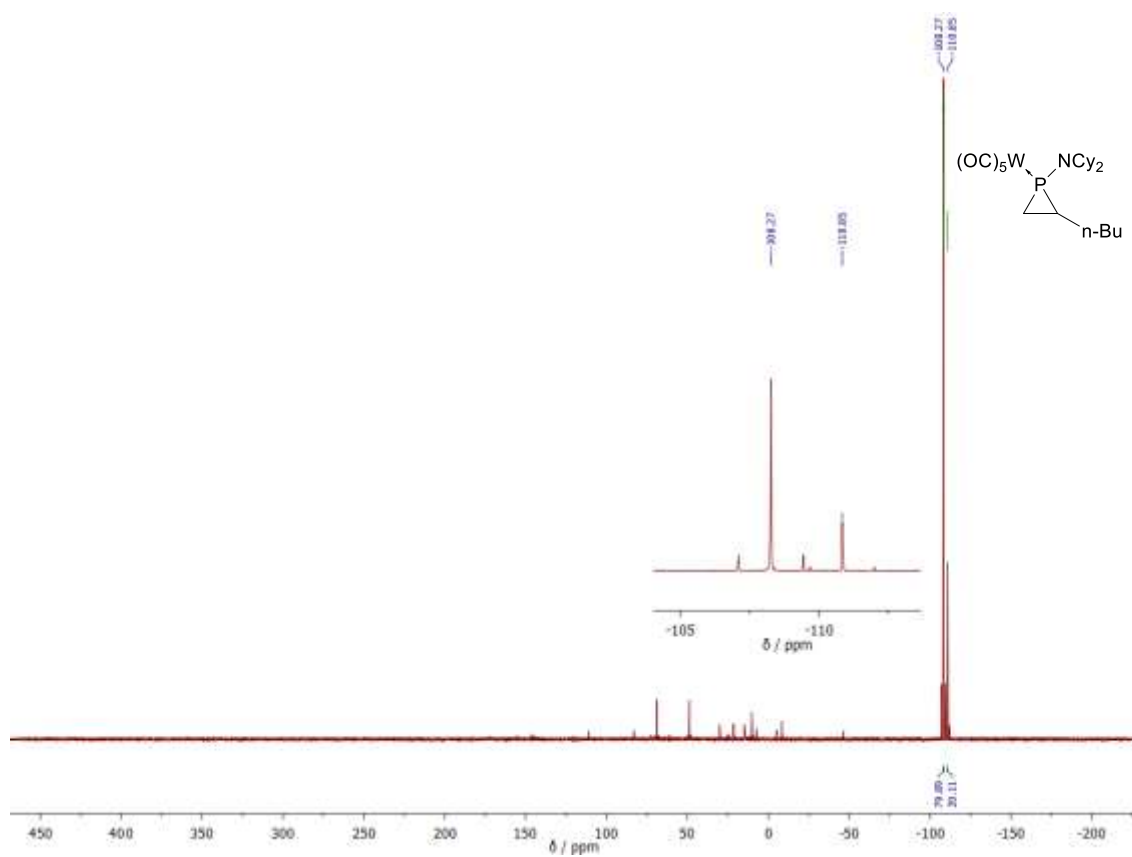

Figure S23.  $^{31}\text{P}\{^1\text{H}\}$  NMR spectrum of **8b** in  $\text{C}_6\text{D}_6$  at 121.5 MHz.

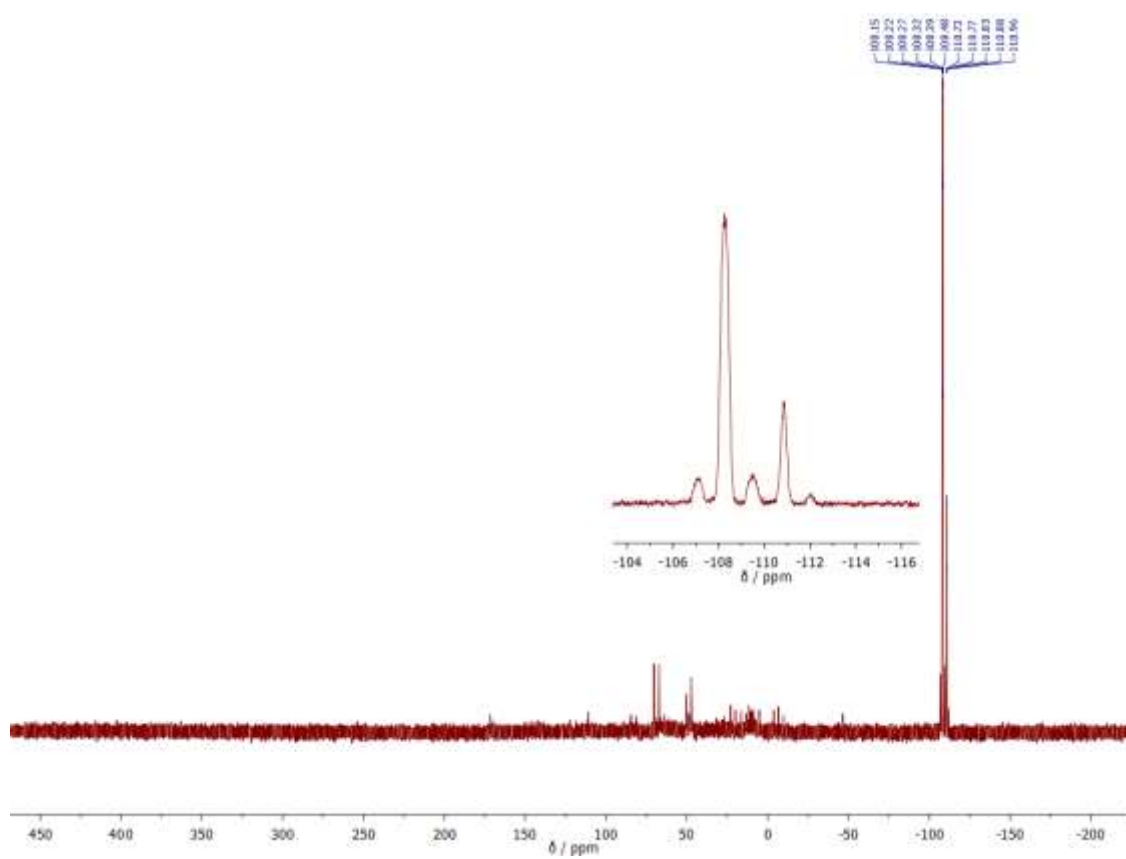

Figure S24.  $^{31}\text{P}$  NMR spectrum of **8b** in  $\text{C}_6\text{D}_6$  at 121.5 MHz.



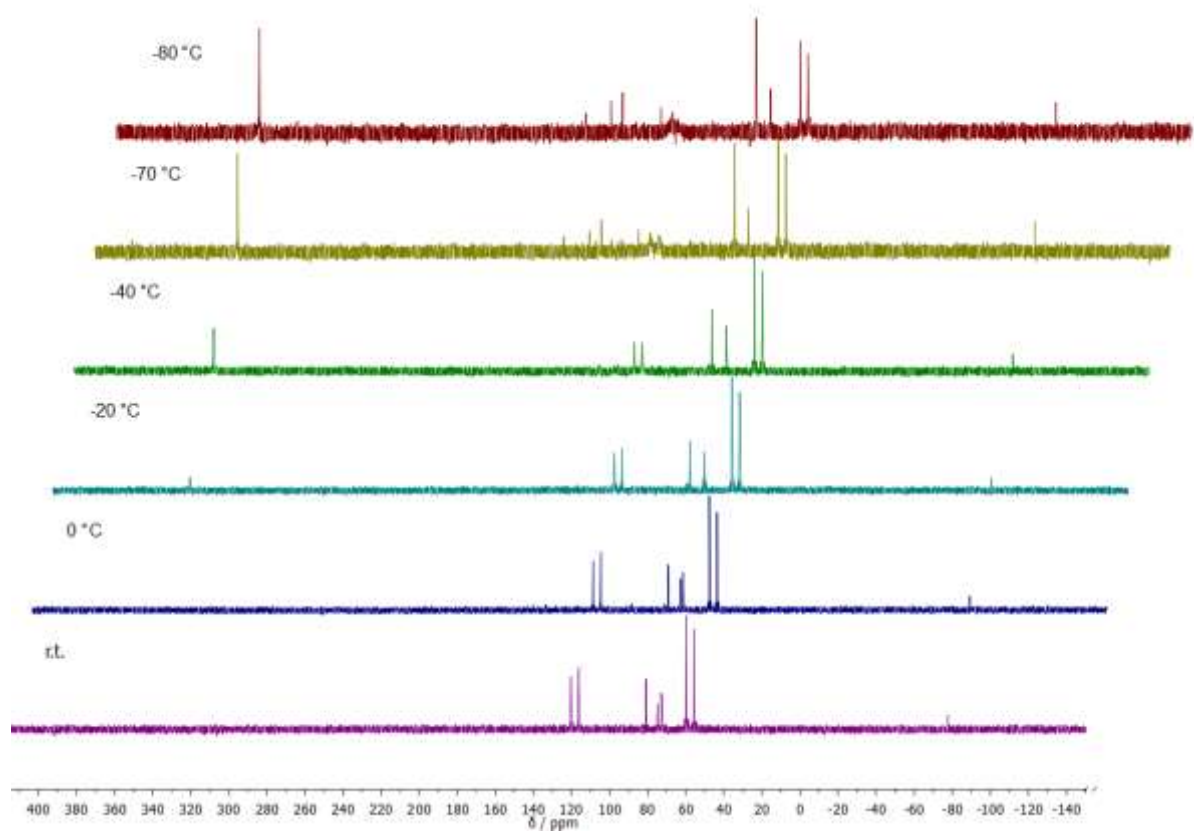

Figure S27:  $^{31}\text{P}\{^1\text{H}\}$  NMR studies on the reaction of **1a** with  $^t\text{BuLi}$  in THF at 121.1 MHz.

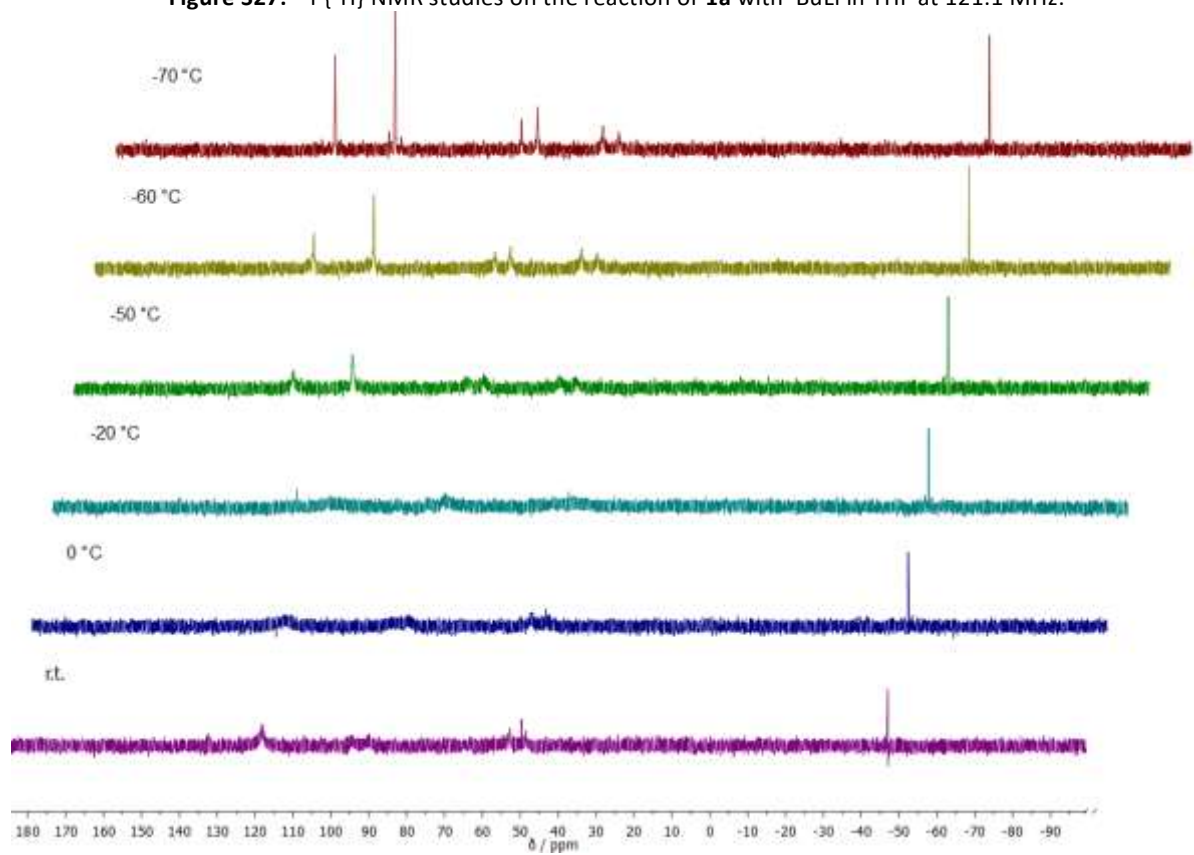

Figure S28:  $^{31}\text{P}\{^1\text{H}\}$  NMR studies on the reaction of **1b** with  $^t\text{BuLi}$  in THF at 121.1 MHz.

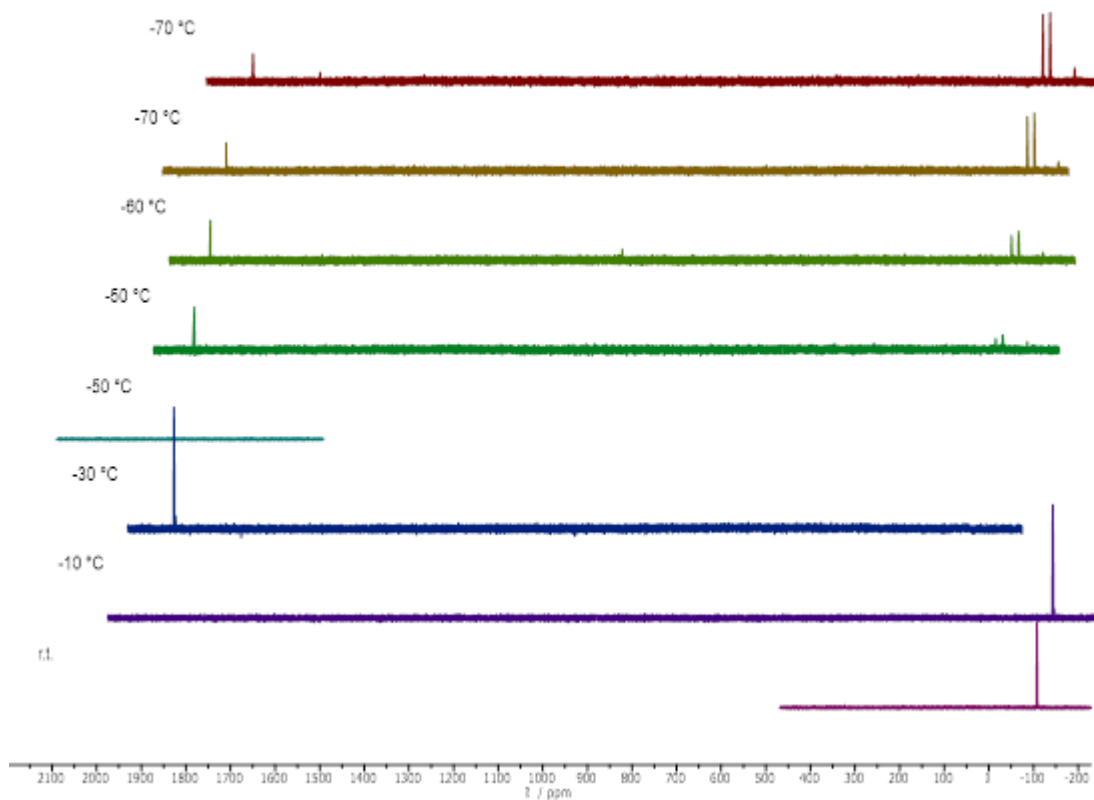

**Figure S29:**  $^{31}\text{P}\{^1\text{H}\}$  NMR studies on the reaction of **1b** with  $^t\text{BuLi}$  and 1-pentene in toluene at 121.1 MHz.

The signal appearing in the low-field  $\sim 1900$  ppm is the expected product **8b** at  $-107.0$  ppm “folded” back into the spectrum due to analogues measurement of this region in the  $^{31}\text{P}$  NMR *WIDE* spectrum. Digital measurement at  $-50$  °C shows the lack of a real signal in that region.

## Crystallographic Data

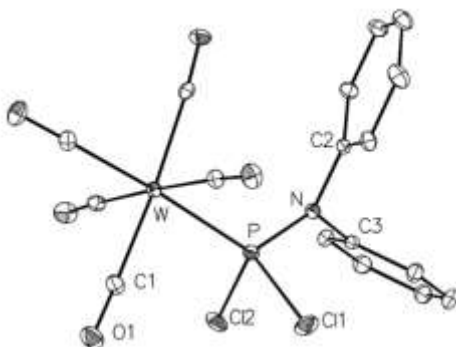

**Crystal Data for 1a:** Suitable single crystals of **1a** were obtained from a concentrated diethylether solution at 4 °C. Data were collected with a Bruker D8-Venture diffractometer equipped with a low-temperature device at 123.0 K by using graphite-monochromated Mo K $\alpha$  radiation ( $\lambda = 0.71073 \text{ \AA}$ ). The structure was solved by Patterson methods (SHELXS-97) and refined by full-matrix least squares on F<sup>2</sup> (SHELXL-97): C<sub>17</sub>H<sub>10</sub>NO<sub>5</sub>PCl<sub>2</sub>W,  $M_r = 593.98$ , crystal dimensions  $0.21 \times 0.14 \times 0.12 \text{ mm}^3$ , orthorhombic, space group P2<sub>1</sub>2<sub>1</sub>2<sub>1</sub>,  $Z = 4$ ,  $a = 9.085(5) \text{ \AA}$ ,  $b = 13.306(8) \text{ \AA}$ ,  $c = 16.740(11) \text{ \AA}$ ,  $\alpha = 90^\circ$ ,  $\beta = 90^\circ$ ,  $\gamma = 90^\circ$ ,  $V = 2024(2) \text{ \AA}^3$ ,  $\rho_{\text{calc}} = 1.950 \text{ g cm}^{-3}$ ,  $\mu = 6.078 \text{ mm}^{-1}$ , transmission factors (min/max) 0.4745/0.7459, empirical absorption correction,  $2\theta_{\text{max}} = 55.998^\circ$ , no. of unique data 4866,  $R_{\text{int}} = 0.0499$ ,  $R_1$  (for  $I > 2\sigma(I)$ ) = 0.0257,  $wR_2$  (for all data) = 0.0490, final  $R_1 = 0.0318$ , goodness of fit 1.026,  $\Delta F$  (max/min) = 0.59 / -0.59 e  $\text{\AA}^{-3}$ . CCDC 1919557.

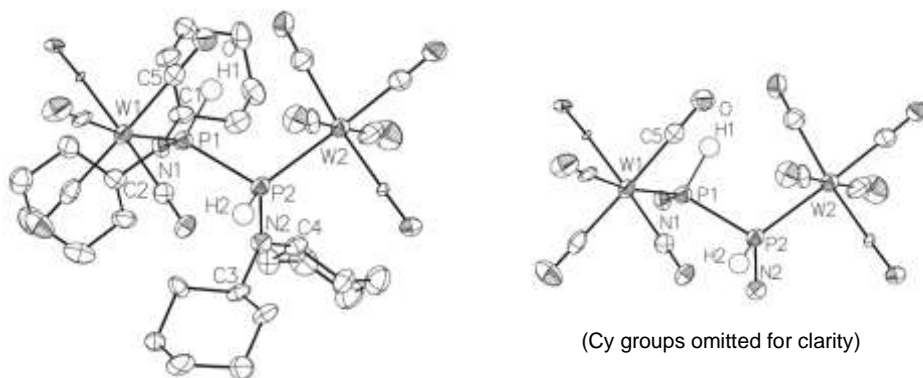

**Crystal Data for cP-P:** Suitable single crystals of **cP-P** were obtained from a concentrated diethylether solution at 4 °C. Data were collected with a Bruker Bruker APEX-II CCD diffractometer equipped with a low-temperature device at 100.0 K by using graphite-monochromated Mo K $\alpha$  radiation ( $\lambda = 0.71073 \text{ \AA}$ ). The structure was solved by Patterson methods (SHELXS-97) and refined by full-matrix least squares on F<sup>2</sup> (SHELXL-97): C<sub>34</sub>H<sub>46</sub>N<sub>2</sub>O<sub>8</sub>P<sub>2</sub>W<sub>2</sub>,  $M_r = 1072.37$ , crystal dimensions  $0.1 \times 0.03 \times 0.03 \text{ mm}^3$ , triclinic, space group P-1,  $Z = 2$ ,  $a = 11.5880(5) \text{ \AA}$ ,  $b = 11.8529(5) \text{ \AA}$ ,  $c = 16.5434(7) \text{ \AA}$ ,  $\alpha = 78.659(4)^\circ$ ,  $\beta = 82.857(3)^\circ$ ,  $\gamma = 62.420(4)^\circ$ ,  $V = 1973.28(16) \text{ \AA}^3$ ,  $\rho_{\text{calc}} = 1.805 \text{ g cm}^{-3}$ ,  $\mu = 5.960 \text{ mm}^{-1}$ , transmission factors (min/max) 0.4373/0.7458, empirical absorption correction,  $2\theta_{\text{max}} = 50.496^\circ$ , no. of unique data 7150,  $R_{\text{int}} = 0.1254$ ,  $R_1$  (for  $I > 2\sigma(I)$ ) = 0.0843,  $wR_2$  (for all data) = 0.2174, final  $R_1 = 0.1039$ , goodness of fit 1.078,  $\Delta F$  (max/min) = 8.21 / -2.62 e  $\text{\AA}^{-3}$ . CCDC 1919561. (Due to poor crystals the data/structure should only serve to confirm the connectivity.)

## Supporting Information (Theory part)

### 1. Computational details

2. **Table S1.** TPSS-D3/def2-TZVP + COSMO computed imaginary frequency (ImF), zero-point energies (ZPE), gas-phase enthalpic (Hc) and Gibbs free-energy (Gc) corrections; the COSMO-RS computed solvation enthalpic (Hsol) and Gibbs free-energy (Gsol) corrections in THF solution; TPSS-D3/def2-QZVP and PW6B95-D3/def2-QZVP single-point energies (TPSS-D3 and PW6B95-D3); the relative electronic energies ( $\Delta ET$  and  $\Delta EP$ ) and Gibbs free-energies ( $\Delta GT$  and  $\Delta GP$ ) at the TPSS-D3 and PW6B95-D3 levels.

3. **Table S2.** The TPSS-D3/def2-TZVP + COSMO optimized atomic Cartesian coordinates (in Å) in THF solution. Each structure is labeled by the specific name (See also **Table S1**), followed by the number of atoms, the total energy, and the detailed atomic coordinates (in double-column text list).

3. **Table S3.** The TPSS-D3/def2-TZVP + CPCM optimized atomic Cartesian coordinates (in Å) in THF solution. Each structure is labeled by the specific name (See also **Table S1**), followed by the number of atoms, the total energy (in hartrees), and the detailed atomic coordinates (in double-column text list). Ph: phenyl; Cy: cyclohexyl; 'Bu: CMe<sub>3</sub>; Anth: anthracenyl; Me: CH<sub>3</sub>.

4. **Table S4.** GIAO TPSS-D3/def2-QZVP computed <sup>31</sup>P chemical shifts (in ppm) using TPSS-D3/def2-TZVP + COSMO optimized geometries (see also Table S2), using the experimental <sup>31</sup>P NMR shift of **1a** [W(CO)<sub>5</sub>PCl<sub>2</sub>NPh<sub>2</sub>] at 108.6 ppm (computed shielding constant: 141.93ppm) as reference.

**Computational Details:** The quantum chemical DFT calculations have been performed with the TURBOMOLE 7.3 suite of programs<sup>1</sup> The structures are fully optimized at the TPSS-D3/def2-TZVP + COSMO(THF) level of theory, which combines the TPSS meta-GGA density functional<sup>2</sup> with the BJ-damped DFT-D3 dispersion correction<sup>3,4</sup> and the def2-TZVP basis set,<sup>5,6</sup> using the Conductor-like Screening Model (COSMO) continuum solvation model<sup>7</sup> for THF solvent (dielectric constant  $\epsilon = 7.58$  and solvent diameter  $R_{\text{sol}} = 3.18$  Å). The density-fitting RI-J approach<sup>5,8,9</sup> is used to accelerate the geometry optimization and numerical harmonic frequency calculations<sup>10</sup> in solution. The optimized structures are characterized by frequency analysis to identify the nature of located stationary points (no imaginary frequency for true minima and only one imaginary frequency for transition state) and to provide thermal corrections (at 298.15 K and 1 atm) according to the modified ideal gas–rigid rotor–harmonic oscillator model.<sup>11</sup> This choice of dispersion-corrected meta-GGA functional makes the efficient exploration of all potential reaction paths possible.

The final solvation free energies in THF are computed with the COSMO-RS solvation model<sup>12</sup> (parameter file: BP\_TZVP\_C30\_1601.ctd) using the COSMOtherm program package<sup>13</sup> on the above TPSS-D3 optimized structures, and corrected by +1.89 kcal·mol<sup>-1</sup> to account for higher reference solute concentration of 1 mol·L<sup>-1</sup> usually used in solution. To check the effects of the chosen DFT functional on the reaction energies and barriers, single-point calculations at the meta-GGA TPSS-D3<sup>2</sup> and hybrid-meta-GGA PW6B95-D3<sup>14</sup> levels are performed using a larger def2-QZVP basis set.<sup>6,15</sup> The final reaction Gibbs free energies ( $\Delta G$ ) are determined from the electronic single-point energies plus TPSS-D3 thermal corrections and COSMO-RS solvation free energies. The computed reaction free energies from both DFT functionals are in good mutual agreement of  $0.5 \pm 1.7$  kcal/mol (average and standard deviations, see Table S1 below). In our discussion, higher-level PW6B95-D3 Gibbs free energies (in kcal/mol, at 298.15 K and 1 mol/L standard state concentration) will be used in our discussion unless specified otherwise.

To help experimental <sup>31</sup>P NMR assignment, nuclear magnetic shielding constants for various P-containing complexes are also computed using the GIAO (Gauge Including Atomic Orbital) method at the TPSS/def2-QZVP level<sup>16</sup>; the final <sup>31</sup>P NMR chemical shifts are computed using the known <sup>31</sup>P NMR signal of the complex **1a** [W(CO)<sub>5</sub>PCl<sub>2</sub>NPh<sub>2</sub>] at 108.6 ppm in C<sub>6</sub>D<sub>6</sub> solution as reference.

### References

- 1 *TURBOMOLE V7.3*, 2018, a development of University of Karlsruhe and Forschungszentrum Karlsruhe GmbH, 1989-2007, TURBOMOLE GmbH, since 2007; available from <http://www.turbomole.com>.
- 2 J. Tao, J. P. Perdew, V. N. Staroverov and G. E. Scuseria, *Physical Review Letters*, 2003, **91**, 146401.
- 3 S. Grimme, J. Antony, S. Ehrlich and H. Krieg, *The Journal of Chemical Physics*, 2010, **132**, 154104-154119.
- 4 S. Grimme, S. Ehrlich and L. Goerigk, *Journal of Computational Chemistry*, 2011, **32**, 1456-1465.
- 5 F. Weigend, M. Häser, H. Patzelt and R. Ahlrichs, *Chemical Physics Letters*, 1998, **294**, 143-152.
- 6 F. Weigend and R. Ahlrichs, *Physical Chemistry Chemical Physics*, 2005, **7**, 3297-3305.
- 7 A. Klamt and G. Schüürmann, *Journal of the Chemical Society, Perkin Transactions 2*, 1993, 799-805.
- 8 K. Eichkorn, F. Weigend, O. Treutler and R. Ahlrichs, *Theoretical Chemistry Accounts*, 1997, **97**, 119-124.
- 9 F. Weigend, *Physical Chemistry Chemical Physics*, 2006, **8**, 1057-1065.
- 10 P. Deglmann, K. May, F. Furche and R. Ahlrichs, *Chemical Physics Letters*, 2004, **384**, 103-107.
- 11 S. Grimme, *Chemistry - A European Journal*, 2012, **18**, 9955-9964.
- 12 F. Eckert and A. Klamt, *AIChE Journal*, 2002, **48**, 369-385.
- 13 F. Eckert and A. Klamt, COSMOtherm, Version C3.0, Release 16.01; COSMOlogic GmbH & Co. KG, Leverkusen, Germany 2015.
- 14 Y. Zhao and D. G. Truhlar, *The Journal of Physical Chemistry A*, 2005, **109**, 5656-5667.
- 15 F. Weigend, F. Furche and R. Ahlrichs, *The Journal of Chemical Physics*, 2003, **119**, 12753-12762.
- 16 Ziegler, T.; Schreckenbach, G. *J. Phys. Chem.* **1995**, *99*, 606–611.



**Table S1.** TPSS-D3/def2-TZVP + COSMO computed imaginary frequency (ImF), zero-point energies (ZPE), gas-phase enthalpic (Hc) and Gibbs free-energy (Gc) corrections; the COSMO-RS computed solvation enthalpic (Hsol) and Gibbs free-energy (Gsol) corrections in THF solution; TPSS-D3/def2-QZVP and PW6B95-D3/def2-QZVP single-point energies (TPSS-D3 and PW6B95-D3); the relative electronic energies ( $\Delta ET$  and  $\Delta EP$ ) and Gibbs free-energies ( $\Delta GT$  and  $\Delta GP$ ) at the TPSS-D3 and PW6B95-D3 levels.

| Reactions                                                                                 | ImF<br>cm <sup>-1</sup> | ZPE<br>kcal<br>/mol | Hc<br>kcal<br>/mol | Gc<br>kcal<br>/mol | Hsol<br>kcal<br>/mol | Gsol<br>kcal<br>/mol | TPSS-D3<br>E <sub>h</sub> | PW6B95-D3<br>E <sub>h</sub> | $\Delta ET$<br>kcal<br>/mol | $\Delta EP$<br>kcal<br>/mol | $\Delta GP$<br>kcal<br>/mol | $\Delta GT$<br>kcal<br>/mol |
|-------------------------------------------------------------------------------------------|-------------------------|---------------------|--------------------|--------------------|----------------------|----------------------|---------------------------|-----------------------------|-----------------------------|-----------------------------|-----------------------------|-----------------------------|
| <i>Solvation of LiCl in THF:</i>                                                          |                         |                     |                    |                    |                      |                      |                           |                             |                             |                             |                             |                             |
| 0.5(CILi <sub>2</sub> ) <sub>2</sub>                                                      | 0                       | 148.98              | 158.63             | 131.35             | -14.93               | -11.42               | -933.15460                | -933.98397                  | 0.0                         | 0.0                         | 0.0                         | 0.0                         |
| 0.5(CILi <sub>2</sub> ) <sub>2</sub> + THF                                                | 0                       | 147.39              | 156.83             | 116.34             | -21.43               | -11.55               | -933.12925                | -933.95752                  | 15.9                        | 16.6                        | 1.5                         | 0.8                         |
| CLi <sub>3</sub> – THF                                                                    | 0                       | 150.21              | 159.89             | 138.10             | -17.84               | -18.52               | -933.14924                | -933.97734                  | 3.4                         | 4.2                         | 4.8                         | 4.0                         |
| 0.25(CILi <sub>4</sub> ) <sub>4</sub> + THF                                               | 0                       | 147.80              | 157.24             | 120.78             | -15.96               | -7.54                | -933.14661                | -933.97552                  | 5.0                         | 5.3                         | -1.9                        | -2.2                        |
| <i>...and LiCl precipitation (computed as (LiCl)<sub>28</sub> nano-cluster) formation</i> |                         |                     |                    |                    |                      |                      |                           |                             |                             |                             |                             |                             |
| 0.25 (CILi <sub>4</sub> ) <sub>4</sub>                                                    | 0                       | 75.75               | 81.50              | 66.17              | -8.62                | -6.54                | -700.54275                | -701.13331                  | 0.0                         | 0.0                         | 0.0                         | 0.0                         |
| LiCl + THF                                                                                | 0                       | 73.88               | 79.66              | 53.84              | -13.07               | -5.34                | -700.52549                | -701.11603                  | 10.8                        | 10.9                        | -0.7                        | -0.7                        |
| <i>Solvation of Li/Cl phophinidenoid complex 2a in THF:</i>                               |                         |                     |                    |                    |                      |                      |                           |                             |                             |                             |                             |                             |
| 2a <sup>-</sup> + Lit <sub>4</sub> <sup>+</sup>                                           | 0                       | 435.94              | 470.24             | 368.50             | -106.42              | -93.13               | -2892.40486               | -2895.08882                 | 0.0                         | 0.0                         | 0.0                         | 0.0                         |
| 2at <sub>3</sub> + THF                                                                    | 0                       | 437.38              | 471.15             | 373.74             | -43.56               | -28.90               | -2892.50589               | -2895.18934                 | -63.4                       | -63.1                       | 4.5                         | 4.2                         |
| 2at <sub>2</sub> + 2THF                                                                   | 0                       | 434.91              | 468.87             | 356.84             | -48.92               | -28.19               | -2892.48527               | -2895.16635                 | -50.5                       | -48.7                       | 2.7                         | 0.9                         |
| 5a + 0.25(CILi <sub>4</sub> ) <sub>4</sub> + 3THF                                         | 0                       | 433.79              | 467.00             | 338.94             | -52.68               | -25.03               | -2892.45781               | -2895.14266                 | -33.2                       | -33.8                       | 3.3                         | 3.9                         |
| <i>...with coordinating 12c4 ligand</i>                                                   |                         |                     |                    |                    |                      |                      |                           |                             |                             |                             |                             |                             |
| 2a <sup>-</sup> + Lic <sup>+</sup> + THF                                                  | 0                       | 441.82              | 475.73             | 362.33             | -118.75              | -97.19               | -3042.89552               | -3045.72205                 | 0.00                        | 0.00                        | 0.00                        | 0.00                        |
| 2at <sub>2</sub> + 12c4                                                                   | 0                       | 442.30              | 477.00             | 376.81             | -52.17               | -39.59               | -3042.99138               | -3045.81499                 | -60.16                      | -58.32                      | 13.75                       | 11.91                       |
| 2ac + 2THF                                                                                | 0                       | 441.60              | 475.70             | 364.49             | -55.63               | -34.03               | -3042.98978               | -3045.81763                 | -59.15                      | -59.98                      | 3.44                        | 4.27                        |
| 5a.CILic + 2THF                                                                           | 0                       | 441.48              | 475.67             | 364.09             | -64.67               | -40.85               | -3042.97456               | -3045.79896                 | -49.60                      | -48.26                      | 7.95                        | 6.61                        |
| 5a + CILic + 2THF                                                                         | 0                       | 440.06              | 474.05             | 347.57             | -76.31               | -49.53               | -3042.93516               | -3045.76245                 | -24.88                      | -25.35                      | 7.54                        | 8.02                        |
| 2a-                                                                                       | 0                       | 142.17              | 159.71             | 108.03             | -56.86               | -49.17               | -1954.49739               | -1956.21135                 | 0.00                        | 0.00                        | 0.00                        | 0.00                        |
| 5a + Cl <sup>-</sup>                                                                      | 0                       | 141.89              | 159.76             | 99.50              | -88.90               | -78.36               | -1954.41409               | -1956.12934                 | 52.28                       | 51.47                       | 15.63                       | 16.45                       |
| <i>Lic<sup>+</sup> cation: stable in THF</i>                                              |                         |                     |                    |                    |                      |                      |                           |                             |                             |                             |                             |                             |
| 2Lic <sup>+</sup> + 2THF                                                                  | 0                       | 599.30              | 632.04             | 508.60             | -123.77              | -96.03               | -2176.79624               | -2179.02140                 | 0.0                         | 0.0                         | 0.0                         | 0.0                         |
| Lic <sub>2</sub> <sup>+</sup> + Lit <sub>4</sub> <sup>+</sup>                             | 0                       | 599.72              | 634.22             | 535.12             | -100.83              | -89.11               | -2176.83531               | -2179.06618                 | -24.5                       | -28.1                       | 5.3                         | 8.9                         |
| Lic <sup>+</sup> + THF                                                                    | 0                       | 226.26              | 238.58             | 186.33             | -67.60               | -52.70               | -855.75738                | -856.63151                  | 0.0                         | 0.0                         | 0.0                         | 0.0                         |



|                                                                                                                                                                  |     |        |        |        |         |         |             |             |       |       |       |       |
|------------------------------------------------------------------------------------------------------------------------------------------------------------------|-----|--------|--------|--------|---------|---------|-------------|-------------|-------|-------|-------|-------|
| <b>Lic<sup>+</sup></b>                                                                                                                                           | 0   | 227.60 | 240.28 | 199.69 | -54.54  | -47.01  | -855.79427  | -856.66849  | -23.1 | -23.2 | -4.2  | -4.1  |
| <i>...but unstable with excess 12c4 or chloride Cl<sup>-</sup></i>                                                                                               |     |        |        |        |         |         |             |             |       |       |       |       |
| <b>Lic<sup>+</sup> + 12c4</b>                                                                                                                                    | 0   | 379.10 | 399.89 | 328.88 | -72.48  | -60.42  | -1471.50809 | -1473.00156 | 0.0   | 0.0   | 0.0   | 0.0   |
| <b>Lic<sub>2</sub><sup>+</sup> + THF</b>                                                                                                                         | 0   | 378.00 | 399.43 | 329.26 | -58.62  | -46.16  | -1471.53170 | -1473.03093 | -14.8 | -18.4 | -5.7  | -2.1  |
| <b>Lic<sup>+</sup> + Cl<sup>-</sup></b>                                                                                                                          | 0   | 227.60 | 241.76 | 190.25 | -121.40 | -109.90 | -1316.10487 | -1317.31512 | 0.0   | 0.0   | 0.0   | 0.0   |
| <b>CLic + THF</b>                                                                                                                                                | 0   | 226.12 | 240.03 | 184.02 | -46.93  | -33.05  | -1316.22782 | -1317.43753 | -77.2 | -76.8 | -8.1  | -8.4  |
| <i>Lic<sub>2</sub><sup>+</sup> is more stable than Lit<sub>4</sub><sup>+</sup> and Lic<sup>+</sup>, but still unstable with solvated chloride Cl<sup>-</sup></i> |     |        |        |        |         |         |             |             |       |       |       |       |
| <b>Lit<sub>4</sub><sup>+</sup> + 2*12c4</b>                                                                                                                      | 0   | 596.77 | 629.76 | 518.86 | -85.42  | -70.78  | -2169.33511 | -2171.54360 | 0.0   | 0.0   | 0.0   | 0.0   |
| <b>Lic<sup>+</sup> + 3THF + 12c4</b>                                                                                                                             | 0   | 595.26 | 627.11 | 492.72 | -94.50  | -63.44  | -2169.31966 | -2171.52819 | 9.7   | 9.7   | -11.0 | -11.0 |
| <b>Lic<sub>2</sub><sup>+</sup> + 4THF</b>                                                                                                                        | 0   | 594.16 | 626.65 | 493.09 | -80.64  | -49.18  | -2169.34327 | -2171.55756 | -5.1  | -8.8  | -16.7 | -13.1 |
| <b>Lic<sub>2</sub><sup>+</sup> + Cl<sup>-</sup></b>                                                                                                              | 0   | 305.95 | 325.17 | 265.21 | -118.14 | -108.05 | -1699.23845 | -1700.83535 | 0.0   | 0.0   | 0.0   | 0.0   |
| <b>CLic + 12c4</b>                                                                                                                                               | 0   | 305.57 | 323.91 | 258.60 | -57.53  | -45.46  | -1699.33779 | -1700.92839 | -62.3 | -58.4 | -2.4  | -6.4  |
| <i>Initial Li/Cl exchange is highly exergonic</i>                                                                                                                |     |        |        |        |         |         |             |             |       |       |       |       |
| <b>1a + tBuLic</b>                                                                                                                                               | 0   | 370.67 | 402.14 | 307.77 | -54.93  | -41.08  | -3195.91389 | -3198.76160 | 0.0   | 0.0   | 0.0   | 0.0   |
| <b>2ac.Cl<sup>-</sup>tBu</b>                                                                                                                                     | 0   | 374.07 | 406.09 | 327.06 | -47.31  | -36.86  | -3196.00851 | -3198.85649 | -59.4 | -59.6 | -37.9 | -37.8 |
| <b>2ac + tBuCl</b>                                                                                                                                               | 0   | 373.69 | 404.94 | 313.75 | -48.46  | -36.55  | -3196.00105 | -3198.85025 | -54.7 | -55.6 | -45.1 | -44.2 |
| <i>Solvation of tBuLi: tetrameric (tBuLi)<sub>4</sub> in THF but neutral monomeric tBuLic with excess 12c4</i>                                                   |     |        |        |        |         |         |             |             |       |       |       |       |
| <b>tBuLic + 12c4</b>                                                                                                                                             | 0   | 378.18 | 399.24 | 328.80 | -50.02  | -38.40  | -1396.92766 | -1398.34536 | 0.0   | 0.0   | 0.0   | 0.0   |
| <b>0.25*(tBuLi)<sub>4</sub> + 2*12c4</b>                                                                                                                         | 0   | 378.04 | 398.96 | 325.81 | -39.61  | -29.25  | -1396.92914 | -1398.34807 | -0.9  | -1.7  | 4.9   | 5.7   |
| <b>tBu<sup>-</sup> + Lic<sub>2</sub><sup>+</sup></b>                                                                                                             | 0   | 376.86 | 398.55 | 329.20 | -109.40 | -99.27  | -1396.81878 | -1398.24221 | 68.3  | 64.7  | 4.3   | 7.9   |
| <i>Facile lithilation of 1a with tBuLic</i>                                                                                                                      |     |        |        |        |         |         |             |             |       |       |       |       |
| <b>1a + tBuLic</b>                                                                                                                                               | 0   | 370.67 | 402.14 | 307.77 | -54.93  | -41.08  | -3195.91389 | -3198.76160 | 0.0   | 0.0   | 0.0   | 0.0   |
| <b>1a.tBuLic</b>                                                                                                                                                 | 0   | 372.65 | 405.26 | 323.99 | -49.64  | -38.86  | -3195.99773 | -3198.84309 | -52.6 | -51.2 | -34.6 | -36.1 |
| <b>2ac.Cl<sup>-</sup>tBu</b>                                                                                                                                     | 0   | 374.07 | 406.09 | 327.06 | -47.31  | -36.86  | -3196.00851 | -3198.85649 | -59.4 | -59.6 | -37.9 | -37.8 |
| <b>2ac + tBuCl</b>                                                                                                                                               | 0   | 373.69 | 404.94 | 313.75 | -48.46  | -36.55  | -3196.00105 | -3198.85025 | -54.7 | -55.6 | -45.1 | -44.2 |
| <i>tBuLic as potential hydride H<sup>-</sup> source</i>                                                                                                          |     |        |        |        |         |         |             |             |       |       |       |       |
| <b>5a + tBuLic + THF</b>                                                                                                                                         | 0   | 440.63 | 473.64 | 363.16 | -61.47  | -41.47  | -2507.92118 | -2510.33722 | 0.0   | 0.0   | 0.0   | 0.0   |
| <b>TSh + THF</b>                                                                                                                                                 | 18i | 441.23 | 474.30 | 379.07 | -59.72  | -41.75  | -2507.96527 | -2510.36821 | -27.7 | -19.5 | -5.7  | -13.9 |
| <b>2ah<sup>-</sup> + CH<sub>2</sub>CMe<sub>2</sub> + Lic<sup>+</sup></b>                                                                                         | 0   | 441.49 | 474.39 | 364.29 | -114.68 | -97.57  | -2507.93275 | -2510.35093 | -7.3  | -8.6  | -61.7 | -60.3 |
| <i>...and tBuCl as potential H<sup>+</sup> source aided by Li<sup>+</sup></i>                                                                                    |     |        |        |        |         |         |             |             |       |       |       |       |
| <b>2a<sup>-</sup> + tBuCl + Lic<sup>+</sup> - THF</b>                                                                                                            | 0   | 373.92 | 404.97 | 311.59 | -111.57 | -99.71  | -3195.90679 | -3198.75467 | 0.0   | 0.0   | 0.0   | 0.0   |

|                                                                                                                                                 |      |        |        |        |         |        |             |             |        |        |       |        |
|-------------------------------------------------------------------------------------------------------------------------------------------------|------|--------|--------|--------|---------|--------|-------------|-------------|--------|--------|-------|--------|
| <b>2a<sup>-</sup> + tBuClLic<sup>+</sup></b>                                                                                                    | 0    | 374.25 | 405.16 | 311.93 | -113.45 | -97.00 | -3195.89452 | -3198.74147 | 7.7    | 8.3    | 9.4   | 8.9    |
| <b>TSp</b>                                                                                                                                      | 181i | 368.77 | 401.70 | 319.30 | -52.77  | -40.33 | -3195.97750 | -3198.81532 | -44.4  | -38.1  | 25.2  | 18.9   |
| <b>2aH + ClLic + tBue</b>                                                                                                                       | 0    | 370.49 | 401.93 | 295.31 | -68.40  | -50.89 | -3195.97773 | -3198.82864 | -44.5  | -46.4  | -13.9 | -12.0  |
| <i>Li<sup>+</sup> aided H<sup>+</sup> transfer from MeOH (or oH) to 2a<sup>-</sup></i>                                                          |      |        |        |        |         |        |             |             |        |        |       |        |
| <b>Lic<sup>+</sup> + MeOH</b>                                                                                                                   | 0    | 259.16 | 274.54 | 216.95 | -66.45  | -51.81 | -971.59213  | -972.58014  | 0.0    | 0.0    | 0.0   | 0.0    |
| <b>HoLic<sup>+</sup> + THF</b>                                                                                                                  | 0    | 260.39 | 275.15 | 217.10 | -71.88  | -51.10 | -971.58660  | -972.57504  | 3.5    | 3.2    | 2.2   | 2.4    |
| <b>2a<sup>-</sup> + HoLic<sup>+</sup></b>                                                                                                       | 0    | 330.51 | 359.11 | 270.51 | -121.40 | -99.27 | -2693.48013 | -2695.94418 | 0.0    | 0.0    | 0.0   | 0.0    |
| <b>TS1</b>                                                                                                                                      | 71i  | 326.33 | 355.67 | 280.65 | -42.02  | -32.30 | -2693.58070 | -2696.03851 | -63.1  | -59.2  | 16.0  | 12.1   |
| <b>2aH + MeOLic</b>                                                                                                                             | 0    | 326.79 | 355.95 | 265.75 | -57.94  | -43.71 | -2693.53576 | -2695.99766 | -34.9  | -33.6  | 17.2  | 15.9   |
| <b>TS2</b>                                                                                                                                      | 0    | 328.71 | 358.02 | 283.38 | -43.79  | -34.02 | -2693.58324 | -2696.03882 | -64.7  | -59.4  | 16.8  | 11.5   |
| <b>3a + ClLic</b>                                                                                                                               | 0    | 328.57 | 357.39 | 268.78 | -63.06  | -48.71 | -2693.59766 | -2696.06126 | -73.8  | -73.5  | -24.6 | -24.9  |
| <i>...Alternative mechanism via MeOH trapping of 5a is kinetically 4.7kcal/mol less favorable (TS3).</i>                                        |      |        |        |        |         |        |             |             |        |        |       |        |
| <b>2a<sup>-</sup> + Lic<sup>+</sup> + THF</b>                                                                                                   | 0    | 441.82 | 475.73 | 362.33 | -118.75 | -97.19 | -3042.89552 | -3045.72205 | 0.00   | 0.00   | 0.00  | 0.00   |
| <b>5a + ClLic + 2THF</b>                                                                                                                        | 0    | 440.06 | 474.05 | 347.57 | -76.31  | -49.53 | -3042.93516 | -3045.76245 | -24.88 | -25.35 | 7.54  | 8.02   |
| <b>5a + 3MeOH</b>                                                                                                                               | 0    | 236.57 | 261.06 | 160.72 | -57.76  | -29.88 | -1841.49707 | -1843.21767 | 0.0    | 0.0    | 0.0   | 0.0    |
| <b>TS3a + MeOH</b>                                                                                                                              | 731i | 236.03 | 259.87 | 183.99 | -39.17  | -24.18 | -1841.51342 | -1843.22281 | -10.3  | -3.2   | 22.0  | 14.9   |
| <b>TS31</b>                                                                                                                                     | 307i | 238.68 | 262.11 | 198.54 | -28.66  | -21.00 | -1841.54865 | -1843.25704 | -32.4  | -24.7  | 16.3  | 8.7    |
| <b>TS32</b>                                                                                                                                     | 198i | 238.52 | 261.83 | 198.40 | -29.51  | -21.50 | -1841.54791 | -1843.25574 | -31.9  | -23.9  | 16.5  | 8.5    |
| <b>TS3</b>                                                                                                                                      | 273i | 238.39 | 261.72 | 198.39 | -29.63  | -21.57 | -1841.54776 | -1843.25545 | -31.8  | -23.7  | 16.6  | 8.5    |
| <b>3a + 2MeOH</b>                                                                                                                               | 0    | 237.62 | 261.61 | 173.89 | -47.28  | -26.26 | -1841.56941 | -1843.28924 | -45.4  | -44.9  | -30.0 | -30.5  |
| <i>...but trapping of electrophilic 5a with PhCCPh is kinetically 1.3 kcal/mol more facile (TS4) than trapping of 2a<sup>-</sup> with MeOH.</i> |      |        |        |        |         |        |             |             |        |        |       |        |
| <b>5a + PhCCPh</b>                                                                                                                              | 0    | 262.19 | 285.49 | 207.72 | -38.60  | -26.90 | -2033.92024 | -2035.89713 | 0.0    | 0.0    | 0.0   | 0.0    |
| <b>TS4</b>                                                                                                                                      | -136 | 260.38 | 284.61 | 219.57 | -32.92  | -24.12 | -2033.93014 | -2035.90049 | -6.2   | -2.1   | 10.6  | 6.5    |
| <b>5a</b>                                                                                                                                       | 0    | 262.21 | 286.05 | 222.27 | -33.07  | -24.42 | -2033.99088 | -2035.96810 | -44.3  | -44.5  | -29.4 | -29.2  |
| <i>...trapping of 5a with more nucleophilic C<sub>2</sub>H<sub>4</sub> (TS5) is more facile</i>                                                 |      |        |        |        |         |        |             |             |        |        |       |        |
| <b>5a + C<sub>2</sub>H<sub>4</sub></b>                                                                                                          | 0    | 173.71 | 192.59 | 127.66 | -25.02  | -16.63 | -1572.74510 | -1574.20656 | 0.0    | 0.0    | 0.0   | 0.0    |
| <b>TS5</b>                                                                                                                                      | 91i  | 174.40 | 192.92 | 139.36 | -23.30  | -16.55 | -1572.75588 | -1574.21317 | -6.8   | -4.1   | 5.7   | 3.1    |
| <b>7a</b>                                                                                                                                       | 0    | 176.01 | 194.00 | 141.75 | -23.26  | -16.70 | -1572.79760 | -1574.26179 | -32.9  | -34.7  | -22.5 | -20.8  |
| <i>... and even more facile with MeNH<sub>2</sub> (or nH)</i>                                                                                   |      |        |        |        |         |        |             |             |        |        |       |        |
| <b>5a + MeNH<sub>2</sub></b>                                                                                                                    | 0    | 181.46 | 200.58 | 134.13 | -27.41  | -18.08 | -1590.02521 | -1591.50134 | 0.00   | 0.00   | 0.00  | 0.00   |
| <b>5a.nH</b>                                                                                                                                    | 0    | 184.53 | 203.09 | 149.66 | -37.99  | -24.37 | -1590.05333 | -1591.52886 | -17.65 | -17.27 | -9.92 | -10.30 |

---

|                              |      |        |        |        |        |        |             |             |        |        |        |        |
|------------------------------|------|--------|--------|--------|--------|--------|-------------|-------------|--------|--------|--------|--------|
| <b>5a.nH + nH</b>            | 0    | 224.10 | 245.39 | 174.85 | -43.36 | -26.97 | -1685.97506 | -1687.54749 | -17.65 | -17.27 | -9.92  | -10.30 |
| <b>TSn2</b>                  | 869i | 222.35 | 243.57 | 184.64 | -43.85 | -29.20 | -1685.98678 | -1687.55373 | -25.00 | -21.18 | -8.16  | -11.98 |
| <b>4a + MeNH<sub>2</sub></b> | 0    | 221.60 | 243.10 | 171.98 | -31.01 | -20.19 | -1686.01140 | -1687.58455 | -40.46 | -40.52 | -29.26 | -29.20 |

---

**Table S2.** The TPSS-D3/def2-TZVP + COSMO optimized atomic Cartesian coordinates (in Å) in THF solution. Each structure is labeled by the specific name (See also **Table S1**), followed by the number of atoms, the total energy (in hartrees), and the detailed atomic coordinates (in double-column text list). Ph: phenyl; Cy: cyclohexyl. **9** as possible diphosphane (complex) side products.

|                                                                    |                                                             |            |            |            |
|--------------------------------------------------------------------|-------------------------------------------------------------|------------|------------|------------|
| <b>12c4</b> 12-crown-4 ligand $c\text{-(C}_2\text{H}_4\text{O)}_4$ | H                                                           | -1.8686027 | 3.4901394  | -3.5122811 |
| 28                                                                 | H                                                           | 1.1610677  | 6.0618857  | -1.8584995 |
| Energy = -615.6885361593                                           | H                                                           | -0.6824079 | 5.6746927  | -3.4789710 |
| O -0.2904976 -2.3428677 -0.6138394                                 | C                                                           | 0.3241250  | 2.0588126  | 1.2986873  |
| O 0.5660503 1.0894427 1.4833774                                    | C                                                           | -1.0235785 | 2.2903640  | 1.5898648  |
| O -1.6362858 -0.8171597 1.4764910                                  | C                                                           | 1.2758458  | 2.0413746  | 2.3218442  |
| O 1.9126711 -0.4335819 -0.6082963                                  | C                                                           | -1.4153049 | 2.4851184  | 2.9113750  |
| C 0.2034286 0.3424507 2.6451410                                    | H                                                           | -1.7523828 | 2.3103809  | 0.7860706  |
| C 1.0516711 -2.7294689 -0.3171562                                  | C                                                           | 0.8701011  | 2.2124267  | 3.6466821  |
| C -1.2629300 -2.1846869 1.6515247                                  | H                                                           | 2.3271536  | 1.9185653  | 2.0834038  |
| C -1.2636436 -2.8704844 0.2940288                                  | C                                                           | -0.4736983 | 2.4342184  | 3.9442308  |
| C -1.2826404 0.0265202 2.5780238                                   | H                                                           | -2.4629629 | 2.6609032  | 3.1368678  |
| C 1.9735901 1.1138102 1.2223787                                    | H                                                           | 1.6113204  | 2.1877524  | 4.4397898  |
| C 2.0014511 -1.7932060 -1.0488531                                  | H                                                           | -0.7881754 | 2.5749756  | 4.9738114  |
| C 2.5112027 -0.1963172 0.6667682                                   | W                                                           | 1.8135999  | -1.5392660 | 0.7962428  |
| H 0.4057632 0.9294603 3.5561346                                    | C                                                           | 3.3897190  | -2.0731573 | -0.4211887 |
| H 0.7907935 -0.5828911 2.7119333                                   | O                                                           | 4.2698067  | -2.3873058 | -1.0979311 |
| H -0.2736007 -2.2609029 2.1218873                                  | C                                                           | 3.1271138  | -0.8423081 | 2.2288182  |
| H 1.2347811 -3.7637199 -0.6520059                                  | O                                                           | 3.8511181  | -0.4465302 | 3.0350281  |
| H 1.2361152 -2.6963274 0.7647699                                   | C                                                           | 1.8491137  | -3.3980185 | 1.6162962  |
| H -1.1149966 -3.9520384 0.4389816                                  | O                                                           | 1.8744065  | -4.4628099 | 2.0678038  |
| H -1.8471167 0.9514803 2.4279688                                   | C                                                           | 0.2243200  | -1.0941017 | 2.0446316  |
| H -2.2305406 -2.7138632 -0.1934584                                 | O                                                           | -0.6668868 | -0.9256982 | 2.7553257  |
| H 2.2994796 -1.0242140 1.3563200                                   | C                                                           | 0.4543047  | -2.1769793 | -0.6178014 |
| H -1.9833273 -2.6951898 2.3115399                                  | O                                                           | -0.3181369 | -2.5248931 | -1.4009680 |
| H -1.5968216 -0.4249572 3.5319892                                  | Cl                                                          | 1.6758839  | 0.4650518  | -2.4302917 |
| H 1.7463066 -1.7710465 -2.1126510                                  |                                                             |            |            |            |
| H 2.5339905 1.3751311 2.1335568                                    | <b>1b</b> $[\text{W}(\text{CO})_5]\text{PCl}_2\text{NCy}_2$ |            |            |            |
| H 2.1181659 1.9085982 0.4846068                                    | 49                                                          |            |            |            |
| H 3.0304624 -2.1705987 -0.9424640                                  | Energy = -2421.864473646                                    |            |            |            |
| H 3.6065127 -0.1225194 0.5663079                                   | P                                                           | 1.7816711  | 0.7083713  | 0.5979806  |
|                                                                    | Cl                                                          | 1.8074204  | 1.8186222  | 2.3405499  |
| <b>1a</b> $[\text{W}(\text{CO})_5]\text{PCl}_2\text{NPh}_2$        | N                                                           | 0.8646772  | 1.5971796  | -0.4447616 |
| 37                                                                 | W                                                           | 1.3571047  | -1.7287261 | 1.0375797  |
| Energy = -2414.610287300                                           | C                                                           | 3.2622925  | -1.8337666 | 1.8314916  |
| P 1.8419615 0.6414101 -0.3873341                                   | O                                                           | 4.3145450  | -1.9193381 | 2.2945488  |
| Cl 3.7230221 1.6042948 -0.3557328                                  | C                                                           | 0.6234393  | -1.2432850 | 2.9053230  |
| N 0.7111282 1.8388381 -0.0742397                                   | O                                                           | 0.2101097  | -0.9888732 | 3.9512674  |
| C 0.3480043 2.8773545 -1.0183503                                   | C                                                           | 1.0945106  | -3.6921625 | 1.4633836  |
| C -0.6892612 2.6499591 -1.9229262                                  | O                                                           | 0.9437306  | -4.8133026 | 1.7098316  |
| C 1.0162947 4.1020516 -0.9854731                                   | C                                                           | -0.5777034 | -1.6855555 | 0.3338237  |
| C -1.0596015 3.6615681 -2.8086143                                  | O                                                           | -1.6755987 | -1.7012435 | -0.0253026 |
| H -1.1931225 1.6890933 -1.9292704                                  | C                                                           | 2.0929812  | -2.2130539 | -0.8281279 |
| C 0.6426265 5.1078542 -1.8765069                                   | O                                                           | 2.5020999  | -2.4929714 | -1.8709766 |
| H 1.8153120 4.2610040 -0.2685109                                   | Cl                                                          | 3.8287450  | 0.9960233  | 0.0605103  |
| C -0.3931511 4.8886114 -2.7876879                                  | C                                                           | 0.4346364  | 0.8546736  | -1.6764975 |

|   |            |            |            |
|---|------------|------------|------------|
| C | -1.0457214 | 1.0868392  | -1.9944298 |
| C | 1.3300349  | 1.1614112  | -2.8839996 |
| H | 0.5562191  | -0.2079213 | -1.4337162 |
| C | -1.4603461 | 0.2228851  | -3.1953788 |
| H | -1.2130488 | 2.1432875  | -2.2408506 |
| H | -1.6547742 | 0.8532361  | -1.1159575 |
| C | 0.9019641  | 0.3127372  | -4.0909512 |
| H | 1.2504129  | 2.2261277  | -3.1410469 |
| H | 2.3758208  | 0.9651748  | -2.6253403 |
| C | -0.5824573 | 0.5149525  | -4.4191815 |
| H | -2.5163107 | 0.4014960  | -3.4262791 |
| H | -1.3678245 | -0.8381516 | -2.9254793 |
| H | 1.5264716  | 0.5647930  | -4.9553029 |
| H | 1.0819222  | -0.7473881 | -3.8656405 |
| H | -0.8744380 | -0.1306414 | -5.2554248 |
| H | -0.7449136 | 1.5532745  | -4.7414804 |
| C | 0.7168006  | 3.0884915  | -0.5226860 |
| C | -0.3823151 | 3.5936949  | 0.4226583  |
| C | 2.0234370  | 3.8787705  | -0.3860920 |
| H | 0.3614779  | 3.2596492  | -1.5448360 |
| C | -0.6283213 | 5.0918307  | 0.1958813  |
| H | -0.0845133 | 3.4245166  | 1.4613746  |
| H | -1.2977252 | 3.0187515  | 0.2474549  |
| C | 1.7484379  | 5.3753072  | -0.6015654 |
| H | 2.4584123  | 3.7309466  | 0.6068922  |
| H | 2.7501454  | 3.5138811  | -1.1183362 |
| C | 0.6695801  | 5.8923233  | 0.3582083  |
| H | -1.3930633 | 5.4478069  | 0.8954895  |
| H | -1.0241243 | 5.2476689  | -0.8181804 |
| H | 2.6805878  | 5.9368440  | -0.4730042 |
| H | 1.4178668  | 5.5378278  | -1.6375707 |
| H | 0.4838704  | 6.9580196  | 0.1806271  |
| H | 1.0279906  | 5.7963212  | 1.3928762  |

**2ac** [W(CO)<sub>5</sub>]PClNPh<sub>2</sub>Li(**12c4**)  
65

Energy = -2577.681892130

|    |           |           |            |
|----|-----------|-----------|------------|
| P  | 0.2727039 | 0.2706366 | -0.1909634 |
| Cl | 0.5068613 | 0.7371932 | -2.3649055 |
| N  | 0.5075360 | 1.8042256 | 0.5585547  |
| C  | 1.7424523 | 2.4888708 | 0.7084818  |
| C  | 2.7774248 | 2.3021832 | -0.2173834 |
| C  | 1.9528865 | 3.3378613 | 1.8070152  |
| C  | 4.0117034 | 2.9206707 | -0.0257435 |
| H  | 2.5999459 | 1.6858249 | -1.0895871 |
| C  | 3.1863822 | 3.9592284 | 1.9845655  |
| H  | 1.1574200 | 3.4903920 | 2.5293965  |
| C  | 4.2277052 | 3.7493370 | 1.0762402  |
| H  | 4.8049537 | 2.7560208 | -0.7500228 |
| H  | 3.3381141 | 4.5999877 | 2.8491107  |
| H  | 5.1904242 | 4.2301381 | 1.2237240  |

|    |            |            |            |
|----|------------|------------|------------|
| C  | -0.6643542 | 2.4437292  | 1.0870178  |
| C  | -1.4077473 | 1.8036922  | 2.0835841  |
| C  | -1.0576344 | 3.7049418  | 0.6261222  |
| C  | -2.5419848 | 2.4193851  | 2.6133609  |
| H  | -1.0782856 | 0.8354472  | 2.4495718  |
| C  | -2.1917748 | 4.3154045  | 1.1574220  |
| H  | -0.4701509 | 4.1964357  | -0.1435911 |
| C  | -2.9367989 | 3.6766202  | 2.1530455  |
| H  | -3.1078404 | 1.9197937  | 3.3947869  |
| H  | -2.4975192 | 5.2915730  | 0.7918618  |
| H  | -3.8165704 | 4.1586860  | 2.5698054  |
| W  | 2.0854966  | -1.4543971 | 0.4391658  |
| C  | 3.3789397  | -0.8442881 | -1.0462403 |
| O  | 4.0983412  | -0.5007807 | -1.8849156 |
| C  | 3.0409806  | -0.2285507 | 1.7995681  |
| O  | 3.6067072  | 0.3852875  | 2.5999304  |
| C  | 3.3042621  | -2.9495721 | 1.0173296  |
| O  | 4.0053342  | -3.8179084 | 1.3565212  |
| C  | 0.7125722  | -1.9415881 | 1.8795540  |
| O  | -0.0791580 | -2.1913029 | 2.6914042  |
| C  | 1.1958934  | -2.7369526 | -0.8906201 |
| O  | 0.7344941  | -3.4953419 | -1.6378721 |
| Li | -2.2419195 | -0.1964258 | -0.3636792 |
| O  | -3.3971774 | 1.4676092  | -0.9900590 |
| O  | -2.2019486 | -2.3620321 | -0.3719729 |
| O  | -3.8337925 | -0.4784374 | 0.8713493  |
| C  | -3.0177680 | 1.7082719  | -2.3556980 |
| C  | -4.7519055 | 1.0241339  | -0.8023997 |
| C  | -3.1002212 | -2.7288748 | 0.6942000  |
| C  | -2.5932396 | -2.8904013 | -1.6585550 |
| C  | -4.8289132 | 0.5457308  | 0.6352901  |
| C  | -4.3198422 | -1.8250191 | 0.7012251  |
| H  | -3.6900748 | 2.4387753  | -2.8225046 |
| H  | -2.0128762 | 2.1267400  | -2.2835463 |
| H  | -5.4521761 | 1.8530605  | -0.9734628 |
| H  | -4.9865818 | 0.2091808  | -1.4990612 |
| H  | -2.5286351 | -2.5982816 | 1.6161089  |
| H  | -3.4004006 | -3.7793749 | 0.6059425  |
| H  | -2.1004755 | -3.8550797 | -1.8244245 |
| H  | -3.6799585 | -3.0317000 | -1.6817304 |
| H  | -4.5779259 | 1.3632667  | 1.3137251  |
| H  | -5.8284021 | 0.1661031  | 0.8721159  |
| H  | -4.9879001 | -2.0866493 | 1.5320319  |
| H  | -4.8786079 | -1.9045443 | -0.2409976 |
| O  | -2.6585902 | -0.6201317 | -2.2271841 |
| C  | -2.1936368 | -1.8821242 | -2.7212293 |
| H  | -2.6760147 | -2.1341596 | -3.6729763 |
| H  | -1.1087606 | -1.8319227 | -2.8632169 |
| C  | -2.9832582 | 0.4049860  | -3.1698849 |
| H  | -3.9477034 | 0.1701543  | -3.6393455 |
| H  | -2.2151282 | 0.4806919  | -3.9477147 |

**2ahH** [W(CO)<sub>5</sub>]PH<sub>2</sub>NPh<sub>2</sub>

37

Energy = -1495.272228598

|   |            |            |            |
|---|------------|------------|------------|
| P | 2.0449860  | 0.7943701  | -0.2425410 |
| H | 3.2895875  | 1.4290696  | 0.0069550  |
| H | 2.0635675  | 0.9156764  | -1.6420015 |
| N | 0.8671098  | 2.0003975  | 0.0763206  |
| C | 0.3653502  | 2.8381568  | -0.9725328 |
| C | -0.1976312 | 2.2706787  | -2.1204531 |
| C | 0.4361504  | 4.2302747  | -0.8448097 |
| C | -0.6674298 | 3.0930823  | -3.1447334 |
| H | -0.2805925 | 1.1906490  | -2.2040585 |
| C | -0.0538129 | 5.0459271  | -1.8631038 |
| H | 0.8708529  | 4.6632929  | 0.0509038  |
| C | -0.6005198 | 4.4818746  | -3.0189461 |
| H | -1.1024526 | 2.6452604  | -4.0334215 |
| H | 0.0042548  | 6.1255060  | -1.7578622 |
| H | -0.9751806 | 5.1203280  | -3.8133200 |
| C | 0.4881332  | 2.2506192  | 1.4211085  |
| C | -0.8103937 | 2.6901481  | 1.7189974  |
| C | 1.3912656  | 2.0115409  | 2.4652939  |
| C | -1.1944694 | 2.8677335  | 3.0441075  |
| H | -1.5122051 | 2.8764444  | 0.9123846  |
| C | 0.9894596  | 2.1704122  | 3.7921427  |
| H | 2.4144365  | 1.7198717  | 2.2465336  |
| C | -0.3035314 | 2.5982877  | 4.0886985  |
| H | -2.2046809 | 3.2014466  | 3.2636526  |
| H | 1.6983316  | 1.9703832  | 4.5903328  |
| H | -0.6153479 | 2.7262927  | 5.1207470  |
| W | 1.7347579  | -1.5206418 | 0.6713705  |
| C | 3.3408409  | -2.0926722 | -0.4791203 |
| O | 4.2408901  | -2.4303415 | -1.1220929 |
| C | 2.9904475  | -1.0818273 | 2.2443518  |
| O | 3.6901838  | -0.8180218 | 3.1257004  |
| C | 1.5287244  | -3.4394389 | 1.2983166  |
| O | 1.4185540  | -4.5399054 | 1.6452337  |
| C | 0.1076474  | -1.0055422 | 1.8437138  |
| O | -0.8110405 | -0.7793580 | 2.5028446  |
| C | 0.4639315  | -1.8385463 | -0.9152411 |
| O | -0.2513593 | -1.9884227 | -1.8115312 |

**2ah<sup>-</sup>** [W(CO)<sub>5</sub>]PHNPh<sub>2</sub><sup>-</sup>

36

Energy = -1494.785485374

|   |           |            |            |
|---|-----------|------------|------------|
| P | 1.3435755 | -0.7865603 | -0.5645346 |
| H | 2.0130784 | -0.8472208 | -1.8119247 |
| N | 2.7605891 | -0.0676524 | 0.2687701  |
| C | 2.5957188 | 0.4018009  | 1.5755251  |
| C | 1.3858874 | 0.1987740  | 2.2710825  |
| C | 3.6146669 | 1.1362007  | 2.2213075  |

|   |            |            |            |
|---|------------|------------|------------|
| C | 1.2067073  | 0.7110436  | 3.5548009  |
| H | 0.5917982  | -0.3764897 | 1.8054817  |
| C | 3.4255835  | 1.6352798  | 3.5054159  |
| H | 4.5517506  | 1.3158698  | 1.7043528  |
| C | 2.2213347  | 1.4296854  | 4.1890911  |
| H | 0.2642274  | 0.5314898  | 4.0664151  |
| H | 4.2279663  | 2.1996429  | 3.9748181  |
| H | 2.0806194  | 1.8202721  | 5.1927931  |
| C | 4.0699057  | -0.3603198 | -0.2087429 |
| C | 4.4556486  | 0.0613914  | -1.4879997 |
| C | 4.9737402  | -1.1022367 | 0.5654124  |
| C | 5.7131865  | -0.2688931 | -1.9902736 |
| H | 3.7610702  | 0.6465411  | -2.0833829 |
| C | 6.2332325  | -1.4220832 | 0.0627662  |
| H | 4.6790622  | -1.4289930 | 1.5566321  |
| C | 6.6088194  | -1.0132455 | -1.2189068 |
| H | 5.9962118  | 0.0634797  | -2.9856640 |
| H | 6.9180005  | -2.0083598 | 0.6702055  |
| H | 7.5882747  | -1.2710655 | -1.6119406 |
| W | 1.2255483  | -3.3689970 | 0.0341281  |
| C | 2.9515387  | -3.5327726 | -1.0750715 |
| O | 3.9047837  | -3.6189623 | -1.7306905 |
| C | 2.3031921  | -3.1328999 | 1.7677621  |
| O | 2.9043452  | -3.0280106 | 2.7558216  |
| C | 1.0946703  | -5.3385646 | 0.3648773  |
| O | 1.0251436  | -6.4953122 | 0.5401536  |
| C | -0.4815462 | -2.9410841 | 1.0797635  |
| O | -1.4472479 | -2.6649418 | 1.6677521  |
| C | 0.1339336  | -3.5128242 | -1.6949857 |
| O | -0.4876103 | -3.5795557 | -2.6758391 |

**2aH** [W(CO)<sub>5</sub>]PCIHNPh<sub>2</sub>

37

Energy = -1954.945218471

|    |            |           |            |
|----|------------|-----------|------------|
| P  | 2.0290385  | 1.1162317 | 0.9539504  |
| Cl | 1.6107200  | 2.1876359 | 2.7403260  |
| N  | 1.2854392  | 1.9561126 | -0.2969038 |
| C  | 1.7152395  | 3.2446942 | -0.7624328 |
| C  | 2.6201131  | 4.0276324 | -0.0321268 |
| C  | 1.2255805  | 3.7228667 | -1.9866174 |
| C  | 3.0449479  | 5.2565402 | -0.5374442 |
| H  | 2.9745109  | 3.7082417 | 0.9407303  |
| C  | 1.6526926  | 4.9549583 | -2.4768332 |
| H  | 0.5165205  | 3.1309840 | -2.5542000 |
| C  | 2.5678348  | 5.7285722 | -1.7601000 |
| H  | 3.7434180  | 5.8512724 | 0.0444667  |
| H  | 1.2667197  | 5.3061337 | -3.4292745 |
| H  | 2.8961963  | 6.6891629 | -2.1447802 |
| C  | -0.0219925 | 1.4968375 | -0.7285829 |
| C  | -0.1310183 | 0.6639198 | -1.8422302 |
| C  | -1.1584552 | 1.9201384 | -0.0381084 |

|   |            |            |            |
|---|------------|------------|------------|
| C | -1.3925703 | 0.2479660  | -2.2677550 |
| H | 0.7639304  | 0.3600570  | -2.3730863 |
| C | -2.4168804 | 1.4977446  | -0.4667534 |
| H | -1.0524634 | 2.5695292  | 0.8249544  |
| C | -2.5344584 | 0.6645074  | -1.5811814 |
| H | -1.4800972 | -0.4036603 | -3.1317866 |
| H | -3.3031104 | 1.8162722  | 0.0733779  |
| H | -3.5152742 | 0.3367875  | -1.9119057 |
| W | 1.7888737  | -1.3511454 | 1.1797399  |
| C | 1.3677951  | -1.1771871 | 3.1953007  |
| O | 1.1362393  | -1.0996233 | 4.3218781  |
| C | -0.2498555 | -1.3982294 | 0.8209420  |
| O | -1.3887282 | -1.5010242 | 0.6774619  |
| C | 1.7608216  | -3.3721625 | 1.3529328  |
| O | 1.7549909  | -4.5257179 | 1.4494581  |
| C | 2.2257932  | -1.5517997 | -0.8232976 |
| O | 2.4879163  | -1.6916451 | -1.9398845 |
| C | 3.7969557  | -1.3772874 | 1.6252089  |
| O | 4.9208477  | -1.4085197 | 1.8909030  |
| H | 3.3274594  | 1.6263422  | 0.7956589  |

**2at<sub>2</sub>** [W(CO)<sub>5</sub>]PClNPh<sub>2</sub>Li(THF)<sub>2</sub>  
63

Energy = -2427.176632048

|    |            |            |            |
|----|------------|------------|------------|
| P  | 0.4895927  | 0.6677786  | 0.2865176  |
| Cl | 1.1749677  | 0.3032414  | -1.9580474 |
| N  | 0.0717975  | -0.9009352 | 0.8094211  |
| C  | -1.1915371 | -1.5394272 | 0.5858135  |
| C  | -1.8200275 | -1.4501100 | -0.6569369 |
| C  | -1.7994031 | -2.2457944 | 1.6300844  |
| C  | -3.0738458 | -2.0324331 | -0.8448682 |
| H  | -1.3142420 | -0.9371949 | -1.4671401 |
| C  | -3.0453418 | -2.8351203 | 1.4328458  |
| H  | -1.3008754 | -2.3142764 | 2.5923046  |
| C  | -3.6917866 | -2.7236884 | 0.1980859  |
| H  | -3.5615644 | -1.9508371 | -1.8120133 |
| H  | -3.5208250 | -3.3690556 | 2.2507706  |
| H  | -4.6683048 | -3.1757904 | 0.0511006  |
| C  | 1.1181566  | -1.7266844 | 1.3424496  |
| C  | 1.9953480  | -1.2120101 | 2.3052873  |
| C  | 1.2755747  | -3.0450150 | 0.8971226  |
| C  | 3.0328097  | -2.0010165 | 2.7993563  |
| H  | 1.8447429  | -0.2010209 | 2.6705672  |
| C  | 2.3102190  | -3.8312744 | 1.4023856  |
| H  | 0.5907131  | -3.4445089 | 0.1558424  |
| C  | 3.1964557  | -3.3131159 | 2.3495284  |
| H  | 3.7018276  | -1.5944414 | 3.5526256  |
| H  | 2.4284650  | -4.8504526 | 1.0454457  |
| H  | 4.0006225  | -3.9292674 | 2.7406995  |
| W  | -1.4208392 | 2.3513674  | 0.1588882  |
| C  | -2.2513466 | 1.5817409  | -1.5668663 |

|    |            |            |            |
|----|------------|------------|------------|
| O  | -2.7166695 | 1.1863627  | -2.5482321 |
| C  | -2.7039313 | 1.2172640  | 1.3133483  |
| O  | -3.4572295 | 0.6357342  | 1.9687245  |
| C  | -2.7716615 | 3.8539922  | 0.1799453  |
| O  | -3.5490641 | 4.7200956  | 0.1949846  |
| C  | -0.5532212 | 3.1197255  | 1.8539856  |
| O  | -0.0567979 | 3.5624691  | 2.8038992  |
| C  | -0.1816659 | 3.4756833  | -1.0285044 |
| O  | 0.4926794  | 4.1224219  | -1.7143098 |
| Li | 2.9333177  | 0.6203377  | -0.3783717 |
| O  | 4.2193950  | -0.7441921 | -0.5521802 |
| O  | 3.6888965  | 2.2245925  | 0.3351589  |
| C  | 4.0765111  | -1.9379305 | -1.3863393 |
| C  | 5.4860557  | -0.7895395 | 0.1679143  |
| C  | 3.5688406  | 2.4519207  | 1.7757199  |
| C  | 3.7366097  | 3.5082146  | -0.3610437 |
| C  | 5.2294066  | -2.8526777 | -0.9858508 |
| H  | 3.0888592  | -2.3603632 | -1.1923196 |
| H  | 4.1415512  | -1.6224040 | -2.4330692 |
| C  | 6.3108971  | -1.8517883 | -0.5482476 |
| H  | 5.2791636  | -1.0681777 | 1.2079688  |
| H  | 5.9168533  | 0.2137753  | 0.1349618  |
| C  | 3.7375357  | 3.9557437  | 1.9737092  |
| H  | 2.5753199  | 2.1046332  | 2.0806721  |
| H  | 4.3352010  | 1.8512078  | 2.2731230  |
| C  | 3.2137215  | 4.5240096  | 0.6456769  |
| H  | 3.1275006  | 3.4177704  | -1.2631080 |
| H  | 4.7778869  | 3.7084106  | -0.6397374 |
| H  | 4.9345985  | -3.4853935 | -0.1430427 |
| H  | 5.5479078  | -3.4941781 | -1.8110210 |
| H  | 7.0666431  | -2.2958090 | 0.1044815  |
| H  | 6.8123062  | -1.4212556 | -1.4216191 |
| H  | 3.1799343  | 4.3155681  | 2.8415806  |
| H  | 4.7938471  | 4.2106348  | 2.1074945  |
| H  | 2.1197901  | 4.5374763  | 0.6403783  |
| H  | 3.5756837  | 5.5340748  | 0.4397217  |

**2at<sub>3</sub>** [W(CO)<sub>5</sub>]PClNPh<sub>2</sub>Li(THF)<sub>3</sub>  
76

Energy = -2659.786264299

|    |            |            |            |
|----|------------|------------|------------|
| P  | 0.2039937  | 0.1376733  | -0.8482015 |
| Cl | 0.5905125  | 0.9753382  | -2.8982338 |
| N  | -0.0084192 | -1.5428209 | -1.1500824 |
| C  | -1.1976799 | -2.1014445 | -1.7301812 |
| C  | -1.6607835 | -1.6733565 | -2.9773882 |
| C  | -1.8750853 | -3.1169724 | -1.0444670 |
| C  | -2.7946573 | -2.2654751 | -3.5356916 |
| H  | -1.1309046 | -0.8844247 | -3.4981945 |
| C  | -3.0043831 | -3.7045806 | -1.6085609 |
| H  | -1.5090369 | -3.4365389 | -0.0734603 |
| C  | -3.4657154 | -3.2844607 | -2.8594705 |

|    |            |            |            |
|----|------------|------------|------------|
| H  | -3.1513477 | -1.9277245 | -4.5045642 |
| H  | -3.5306757 | -4.4852500 | -1.0661216 |
| H  | -4.3471790 | -3.7432925 | -3.2979616 |
| C  | 1.0530556  | -2.4693126 | -0.9209215 |
| C  | 1.8684272  | -2.3442042 | 0.2112268  |
| C  | 1.2618238  | -3.5462429 | -1.7959168 |
| C  | 2.8823520  | -3.2678739 | 0.4563555  |
| H  | 1.6797532  | -1.5349396 | 0.9073252  |
| C  | 2.2711861  | -4.4728055 | -1.5387464 |
| H  | 0.6306230  | -3.6548395 | -2.6718588 |
| C  | 3.0900744  | -4.3398167 | -0.4144673 |
| H  | 3.4941654  | -3.1640975 | 1.3486723  |
| H  | 2.4221972  | -5.2989089 | -2.2280913 |
| H  | 3.8729692  | -5.0656141 | -0.2156704 |
| W  | -1.9658210 | 1.1226387  | 0.1265830  |
| C  | -3.4094841 | -0.0020794 | -0.8407045 |
| O  | -4.3386619 | -0.5258879 | -1.2857882 |
| C  | -1.6856670 | -0.4090574 | 1.4644690  |
| O  | -1.4867261 | -1.2967129 | 2.1837647  |
| C  | -3.5218300 | 1.9141529  | 1.1314042  |
| O  | -4.4171145 | 2.3751208  | 1.7180484  |
| C  | -0.8370648 | 2.3976549  | 1.2561636  |
| O  | -0.2924837 | 3.1557136  | 1.9498487  |
| C  | -2.0657770 | 2.4890856  | -1.4105101 |
| O  | -2.1137425 | 3.2304420  | -2.2970775 |
| Li | 2.6670659  | 0.8913247  | -0.4957645 |
| O  | 4.0137187  | -0.1028878 | -1.4648507 |
| O  | 2.9817953  | 2.7905001  | -0.8943622 |
| O  | 3.0611085  | 0.8968722  | 1.4163608  |
| C  | 4.0180474  | -0.4470605 | -2.8757504 |
| C  | 5.1206652  | -0.7901988 | -0.8103581 |
| C  | 2.3876079  | 3.8560711  | -0.1147037 |
| C  | 3.1481368  | 3.3297776  | -2.2337815 |
| C  | 2.2449868  | 0.5399876  | 2.5578875  |
| C  | 4.2913065  | 1.4294509  | 1.9666811  |
| C  | 4.5776196  | -1.8600541 | -2.9123634 |
| H  | 2.9902179  | -0.3509526 | -3.2287906 |
| H  | 4.6623605  | 0.2607118  | -3.4161595 |
| C  | 5.6688602  | -1.8037123 | -1.8286821 |
| H  | 4.7114183  | -1.2674834 | 0.0826363  |
| H  | 5.8691529  | -0.0472340 | -0.5166264 |
| C  | 1.3303059  | 4.4403932  | -1.0435057 |
| H  | 1.9988688  | 3.4098819  | 0.7996643  |
| H  | 3.1643980  | 4.5928246  | 0.1346509  |
| C  | 1.9955539  | 4.3373363  | -2.4374896 |
| H  | 3.1181636  | 2.4856858  | -2.9224325 |
| H  | 4.1289997  | 3.8175748  | -2.2879469 |
| C  | 2.4991761  | 1.6393333  | 3.6012585  |
| H  | 1.2134697  | 0.4810687  | 2.2055830  |
| H  | 2.5635944  | -0.4443742 | 2.9261885  |
| C  | 3.8540986  | 2.2695776  | 3.1721988  |

|   |           |            |            |
|---|-----------|------------|------------|
| H | 4.7773470 | 1.9960393  | 1.1712153  |
| H | 4.9336640 | 0.5917927  | 2.2694975  |
| H | 3.7967042 | -2.5734442 | -2.6369003 |
| H | 4.9742057 | -2.1278350 | -3.8952774 |
| H | 5.8489093 | -2.7783691 | -1.3686202 |
| H | 6.6112190 | -1.4453512 | -2.2540369 |
| H | 0.4318371 | 3.8202593  | -1.0065507 |
| H | 1.0583941 | 5.4650121  | -0.7774445 |
| H | 1.2843247 | 3.9793803  | -3.1841795 |
| H | 2.3854173 | 5.3044007  | -2.7662684 |
| H | 1.7026389 | 2.3851871  | 3.5779111  |
| H | 2.5413219 | 1.2185754  | 4.6083774  |
| H | 3.7167503 | 3.3138815  | 2.8816009  |
| H | 4.5994576 | 2.2358342  | 3.9702513  |

**2a<sup>-</sup>** [W(CO)<sub>5</sub>]PClNPh<sub>2</sub><sup>-</sup>  
36

Energy = -1954.464329645

|    |           |            |            |
|----|-----------|------------|------------|
| P  | 1.1684966 | -1.1760060 | 0.3020863  |
| Cl | 1.3269457 | -0.1010716 | -1.6689328 |
| N  | 2.5711890 | -0.5955405 | 1.1314912  |
| C  | 2.4088620 | 0.5741811  | 1.9394927  |
| C  | 1.3413778 | 0.6654857  | 2.8427426  |
| C  | 3.3052615 | 1.6464849  | 1.8281545  |
| C  | 1.1662718 | 1.8167149  | 3.6093920  |
| H  | 0.6568534 | -0.1720107 | 2.9341626  |
| C  | 3.1310149 | 2.7908620  | 2.6051444  |
| H  | 4.1330839 | 1.5776643  | 1.1293210  |
| C  | 2.0596612 | 2.8856092  | 3.4971470  |
| H  | 0.3355246 | 1.8712487  | 4.3080014  |
| H  | 3.8302365 | 3.6167324  | 2.5030159  |
| H  | 1.9251226 | 3.7790114  | 4.1003886  |
| C  | 3.9091868 | -1.0429061 | 0.9230423  |
| C  | 4.3690175 | -1.3684298 | -0.3569722 |
| C  | 4.7719456 | -1.1804375 | 2.0200832  |
| C  | 5.6639307 | -1.8557081 | -0.5330920 |
| H  | 3.7079606 | -1.2220225 | -1.2027876 |
| C  | 6.0669158 | -1.6573263 | 1.8364138  |
| H  | 4.4155596 | -0.9236571 | 3.0133017  |
| C  | 6.5190095 | -2.0051248 | 0.5597960  |
| H  | 6.0046903 | -2.1122890 | -1.5327161 |
| H  | 6.7208161 | -1.7741581 | 2.6967097  |
| H  | 7.5266905 | -2.3865458 | 0.4207162  |
| W  | 1.3148297 | -3.7144760 | -0.2679804 |
| C  | 2.3848095 | -3.3852220 | -1.9958423 |
| O  | 2.9873632 | -3.2058290 | -2.9688276 |
| C  | 3.0567075 | -4.1174457 | 0.7573830  |
| O  | 4.0079987 | -4.4288317 | 1.3399540  |
| C  | 1.1385689 | -5.6768918 | -0.6595836 |
| O  | 1.0344245 | -6.8183254 | -0.8912039 |
| C  | 0.2888022 | -3.9154786 | 1.4967839  |



O -0.2844038 -4.0170987 2.5015768  
 C -0.4327511 -3.3441003 -1.2805611  
 O -1.4252863 -3.1536122 -1.8505455

**2bhH** [W(CO)<sub>5</sub>]PH<sub>2</sub>NCy<sub>2</sub>

49

Energy = -1502.525255606

P 1.4937712 1.0332556 0.7799174  
 N 0.6473233 1.7341045 -0.4849219  
 W 1.3459567 -1.4564869 1.2202395  
 C 3.2033519 -1.2960980 2.0937231  
 O 4.2451642 -1.2080700 2.5871932  
 C 0.4594427 -0.9949663 3.0207350  
 O -0.0361423 -0.7262468 4.0297118  
 C 1.2992829 -3.4303072 1.6700934  
 O 1.2774018 -4.5603886 1.9323338  
 C -0.5290009 -1.6023397 0.3761645  
 O -1.5873371 -1.7021479 -0.0781330  
 C 2.2514178 -1.8661578 -0.5836399  
 O 2.7697524 -2.1052291 -1.5898144  
 C 0.4246478 0.9593611 -1.7267031  
 C -1.0124545 1.1147495 -2.2405552  
 C 1.4510790 1.2751957 -2.8248527  
 H 0.5570301 -0.0908588 -1.4397717  
 C -1.2408123 0.2342619 -3.4778179  
 H -1.2005573 2.1628970 -2.5095424  
 H -1.7121550 0.8526685 -1.4400617  
 C 1.2100089 0.4068306 -4.0685220  
 H 1.3736260 2.3360771 -3.1004547  
 H 2.4632933 1.1150751 -2.4343177  
 C -0.2272441 0.5577423 -4.5830858  
 H -2.2651200 0.3691176 -3.8439264  
 H -1.1407403 -0.8222606 -3.1917804  
 H 1.9291739 0.6720586 -4.8521436  
 H 1.3922430 -0.6457901 -3.8115682  
 H -0.3890504 -0.0954169 -5.4486255  
 H -0.3836948 1.5905988 -4.9259341  
 C 0.4913269 3.2125508 -0.5674465  
 C -0.6099506 3.7095536 0.3784619  
 C 1.7990298 3.9848738 -0.3499466  
 H 0.1631029 3.4109418 -1.5944148  
 C -0.8298673 5.2208476 0.2172636  
 H -0.3215823 3.4924210 1.4161643  
 H -1.5335875 3.1565610 0.1765727  
 C 1.5717982 5.4938632 -0.5222455  
 H 2.1724317 3.7966715 0.6662748  
 H 2.5627520 3.6237126 -1.0482451  
 C 0.4756387 5.9997145 0.4245061  
 H -1.5970780 5.5621669 0.9217679  
 H -1.2129135 5.4216074 -0.7936408  
 H 2.5103552 6.0318505 -0.3458737

H 1.2765231 5.6979670 -1.5613581  
 H 0.3061208 7.0716963 0.2690311  
 H 0.8109743 5.8748947 1.4640405  
 H 1.0897335 1.8432274 1.8603811  
 H 2.8389358 1.4923878 0.7344569

**2bh<sup>-</sup>** [W(CO)<sub>5</sub>]PHNCy<sub>2</sub><sup>-</sup>

48

Energy = -1502.021875903

P 1.5083985 0.3555475 -0.9540995  
 H 0.1451584 0.3193906 -1.4123019  
 N 1.5353975 1.8953116 -0.1530406  
 W 1.4332849 -1.6235188 0.8245653  
 C 1.9556997 -0.3737637 2.3658187  
 O 2.2780234 0.3191061 3.2411681  
 C -0.5480708 -1.1322414 1.0016603  
 O -1.6699139 -0.8261908 1.0487661  
 C 1.3607578 -3.1840080 2.0749141  
 O 1.2980263 -4.0977451 2.8094050  
 C 0.9767281 -2.8042534 -0.7874108  
 O 0.7276569 -3.4623300 -1.7141630  
 C 3.4251806 -1.8080426 0.3820788  
 O 4.5512314 -1.8647293 0.0961876  
 C 0.4529100 2.2680464 0.7673038  
 C 0.9003382 3.2095981 1.8972940  
 C -0.8001518 2.8397902 0.0778539  
 H 0.1591686 1.3237588 1.2427177  
 C -0.2321540 3.3850557 2.9204707  
 H 1.1600176 4.1968589 1.4909058  
 H 1.7977575 2.8028016 2.3741688  
 C -1.9415933 3.0354278 1.0860418  
 H -0.5467858 3.8059497 -0.3818959  
 H -1.1090044 2.1624575 -0.7272820  
 C -1.5031639 3.9298363 2.2537678  
 H 0.0894976 4.0541158 3.7286586  
 H -0.4531049 2.4114538 3.3808137  
 H -2.8220017 3.4626573 0.5888109  
 H -2.2406548 2.0528694 1.4768093  
 H -2.3118934 4.0177944 2.9904217  
 H -1.3024339 4.9432500 1.8758175  
 C 2.2775888 2.9846003 -0.8186483  
 C 3.7874827 2.7031278 -0.7833496  
 C 1.8237976 3.2769549 -2.2615356  
 H 2.0970712 3.8909666 -0.2262830  
 C 4.5994796 3.8395415 -1.4191493  
 H 3.9692142 1.7628596 -1.3226319  
 H 4.0899715 2.5392479 0.2574294  
 C 2.6312271 4.4218909 -2.8893330  
 H 1.9599515 2.3586508 -2.8496015  
 H 0.7529943 3.5101269 -2.2713358  
 C 4.1355473 4.1225644 -2.8541070

|   |           |           |            |
|---|-----------|-----------|------------|
| H | 5.6688915 | 3.5933230 | -1.4046441 |
| H | 4.4762947 | 4.7532999 | -0.8181601 |
| H | 2.3001903 | 4.5959706 | -3.9213100 |
| H | 2.4380261 | 5.3519792 | -2.3333827 |
| H | 4.7023130 | 4.9601611 | -3.2806066 |
| H | 4.3414496 | 3.2422623 | -3.4798479 |

**2bH** [W(CO)<sub>5</sub>]PHCINCy<sub>2</sub>

49

Energy = -1962.203083537

|   |            |            |            |
|---|------------|------------|------------|
| P | 1.6863411  | 0.9878642  | 0.6275696  |
| N | 0.8089978  | 1.7268331  | -0.5574225 |
| W | 1.2871489  | -1.4031038 | 1.2640497  |
| C | 3.0892259  | -1.3724305 | 2.2715272  |
| O | 4.0865026  | -1.3839483 | 2.8512205  |
| C | 0.3423603  | -0.6777168 | 2.9438371  |
| O | -0.1880327 | -0.2507228 | 3.8771323  |
| C | 1.0103716  | -3.3139043 | 1.8882104  |
| O | 0.8548671  | -4.4031707 | 2.2506473  |
| C | -0.5417218 | -1.5084675 | 0.3249166  |
| O | -1.5814827 | -1.6089662 | -0.1695730 |
| C | 2.2411510  | -2.0277061 | -0.4572602 |
| O | 2.7728545  | -2.3605902 | -1.4267709 |
| C | 0.5375395  | 0.9721520  | -1.8081717 |
| C | -0.9285812 | 1.0861897  | -2.2416405 |
| C | 1.4900301  | 1.3646895  | -2.9461365 |
| H | 0.7295490  | -0.0788420 | -1.5551849 |
| C | -1.1821400 | 0.2060861  | -3.4745809 |
| H | -1.1613579 | 2.1286721  | -2.4948336 |
| H | -1.5828736 | 0.7962122  | -1.4139943 |
| C | 1.2276672  | 0.4963482  | -4.1853789 |
| H | 1.3357018  | 2.4223820  | -3.1998267 |
| H | 2.5262920  | 1.2570004  | -2.6089259 |
| C | -0.2394266 | 0.5799724  | -4.6258793 |
| H | -2.2279410 | 0.3037803  | -3.7865953 |
| H | -1.0269420 | -0.8474977 | -3.2035744 |
| H | 1.8924073  | 0.8050169  | -4.9999836 |
| H | 1.4762540  | -0.5479415 | -3.9492111 |
| H | -0.4136637 | -0.0773527 | -5.4855407 |
| H | -0.4606326 | 1.6052813  | -4.9546363 |
| C | 0.5462992  | 3.1977613  | -0.5711508 |
| C | -0.5275420 | 3.5639366  | 0.4613543  |
| C | 1.8027581  | 4.0597758  | -0.4017079 |
| H | 0.1409264  | 3.4008758  | -1.5683653 |
| C | -0.8782295 | 5.0559963  | 0.3779665  |
| H | -0.1508496 | 3.3333150  | 1.4677569  |
| H | -1.4149197 | 2.9433115  | 0.2975937  |
| C | 1.4398270  | 5.5489658  | -0.4983519 |
| H | 2.2565010  | 3.8627618  | 0.5782047  |
| H | 2.5445019  | 3.7887767  | -1.1596400 |
| C | 0.3721649  | 5.9305994  | 0.5347694  |

|    |            |           |            |
|----|------------|-----------|------------|
| H  | -1.6214851 | 5.3036703 | 1.1442099  |
| H  | -1.3436633 | 5.2605019 | -0.5965966 |
| H  | 2.3422646  | 6.1550981 | -0.3607614 |
| H  | 1.0616657  | 5.7633894 | -1.5081077 |
| H  | 0.1080493  | 6.9896006 | 0.4330966  |
| H  | 0.7833413  | 5.7972842 | 1.5454220  |
| H  | 1.5858258  | 1.9660224 | 1.6298230  |
| Cl | 3.7846100  | 1.3113186 | 0.2793930  |

**2b<sup>-</sup>** [W(CO)<sub>5</sub>]PCINCy<sub>2</sub><sup>-</sup>

48

Energy = -1961.713259038

|    |            |            |            |
|----|------------|------------|------------|
| P  | 1.8361840  | 0.2956373  | -0.9362532 |
| Cl | 0.0117825  | 0.0755644  | -2.3734222 |
| N  | 1.6199223  | 1.8159915  | -0.2516447 |
| W  | 1.3435393  | -1.6557619 | 0.7509015  |
| C  | 1.7113984  | -0.5721230 | 2.4507156  |
| O  | 1.9448838  | -0.0126050 | 3.4426073  |
| C  | -0.6412121 | -1.1038950 | 0.7453146  |
| O  | -1.7527347 | -0.7762911 | 0.7337961  |
| C  | 1.0365267  | -3.2715124 | 1.9002366  |
| O  | 0.8443048  | -4.2105990 | 2.5721339  |
| C  | 1.0485228  | -2.8027849 | -0.9343533 |
| O  | 0.9033547  | -3.4864953 | -1.8588719 |
| C  | 3.3576188  | -2.0036813 | 0.6155147  |
| O  | 4.5034345  | -2.1739140 | 0.5240586  |
| C  | 0.6234787  | 2.1486872  | 0.7862593  |
| C  | 1.2161913  | 2.9801374  | 1.9337175  |
| C  | -0.6295262 | 2.8255803  | 0.2071855  |
| H  | 0.3190686  | 1.1831250  | 1.2009813  |
| C  | 0.1657433  | 3.2008572  | 3.0319952  |
| H  | 1.5475711  | 3.9580153  | 1.5584505  |
| H  | 2.0968944  | 2.4689002  | 2.3352298  |
| C  | -1.6759437 | 3.0621419  | 1.3056828  |
| H  | -0.3493922 | 3.7896087  | -0.2413428 |
| H  | -1.0332150 | 2.1950773  | -0.5912141 |
| C  | -1.0922980 | 3.8755092  | 2.4686225  |
| H  | 0.5935047  | 3.8033507  | 3.8426829  |
| H  | -0.1081648 | 2.2295793  | 3.4669306  |
| H  | -2.5525164 | 3.5703342  | 0.8852003  |
| H  | -2.0219455 | 2.0900882  | 1.6837943  |
| H  | -1.8423785 | 4.0006835  | 3.2595334  |
| H  | -0.8316638 | 4.8824384  | 2.1109546  |
| C  | 2.2376053  | 2.9844107  | -0.9420542 |
| C  | 3.7635533  | 2.9627480  | -0.7815561 |
| C  | 1.8433597  | 3.1017365  | -2.4203116 |
| H  | 1.8577991  | 3.8764293  | -0.4285926 |
| C  | 4.4168745  | 4.1864664  | -1.4372900 |
| H  | 4.1365151  | 2.0394050  | -1.2456487 |
| H  | 4.0114229  | 2.9118297  | 0.2851791  |
| C  | 2.4905739  | 4.3357397  | -3.0639270 |

|   |           |           |            |
|---|-----------|-----------|------------|
| H | 2.1706913 | 2.1920633 | -2.9398618 |
| H | 0.7527587 | 3.1391067 | -2.5077777 |
| C | 4.0172954 | 4.3057529 | -2.9140178 |
| H | 5.5078582 | 4.1269543 | -1.3382474 |
| H | 4.0988612 | 5.0956095 | -0.9053717 |
| H | 2.2113220 | 4.3925380 | -4.1232780 |
| H | 2.1002225 | 5.2455128 | -2.5833832 |
| H | 4.4626534 | 5.2052808 | -3.3572747 |
| H | 4.4158636 | 3.4428634 | -3.4664568 |

**9acCl** {[W(CO)<sub>5</sub>]PClNPh<sub>2</sub>]<sub>2</sub> (one P-P)

72

Energy = -3908.707022113

|    |            |            |            |
|----|------------|------------|------------|
| P  | 1.0586954  | 0.5977892  | -0.4574890 |
| Cl | 0.3965657  | 1.9730286  | -1.9109906 |
| N  | 0.9842184  | 1.4843388  | 0.9789615  |
| C  | -0.1856370 | 2.1995098  | 1.4554973  |
| C  | -1.2437861 | 1.5178700  | 2.0530560  |
| C  | -0.1894921 | 3.5964568  | 1.3993052  |
| C  | -2.3111012 | 2.2352920  | 2.5973886  |
| C  | -1.2529727 | 4.3061783  | 1.9499286  |
| C  | -2.3163779 | 3.6279121  | 2.5515187  |
| C  | 2.2123715  | 1.9400388  | 1.6023642  |
| C  | 2.4524886  | 1.5959401  | 2.9343703  |
| C  | 3.0971200  | 2.7728708  | 0.9168805  |
| C  | 3.6057792  | 2.0567324  | 3.5661049  |
| C  | 4.2570846  | 3.2200125  | 1.5489521  |
| C  | 4.5157118  | 2.8575630  | 2.8714810  |
| W  | 3.2440585  | -0.3670393 | -1.3171113 |
| C  | 3.8897479  | 1.5124148  | -1.8326318 |
| O  | 4.3107323  | 2.5238212  | -2.2035638 |
| C  | 4.2183756  | -0.2871589 | 0.5015005  |
| O  | 4.8470292  | -0.2818094 | 1.4691995  |
| C  | 4.9804926  | -1.0189655 | -2.1200995 |
| O  | 5.9769614  | -1.3840635 | -2.5811005 |
| C  | 2.8087804  | -2.3721945 | -1.0458257 |
| O  | 2.6939260  | -3.5186004 | -1.0099028 |
| H  | -1.2142817 | 0.4385483  | 2.1188973  |
| H  | 0.6417038  | 4.1189126  | 0.9381152  |
| H  | -3.1282212 | 1.6993644  | 3.0690550  |
| H  | -1.2541605 | 5.3908315  | 1.9022428  |
| H  | -3.1429587 | 4.1842781  | 2.9827284  |
| H  | 1.7355344  | 0.9847507  | 3.4735284  |
| H  | 2.8597244  | 3.0873375  | -0.0923126 |
| H  | 3.7961725  | 1.7845567  | 4.5997776  |
| H  | 4.9485658  | 3.8608929  | 1.0104816  |
| H  | 5.4178735  | 3.2069305  | 3.3642760  |
| P  | -0.9418027 | -0.6308914 | -0.5044527 |
| Cl | -0.2667552 | -1.9130708 | -2.0347459 |
| N  | -0.8805657 | -1.6056290 | 0.8744780  |
| C  | 0.2849377  | -2.3495466 | 1.3162504  |

|   |            |            |            |
|---|------------|------------|------------|
| C | 1.3380804  | -1.7064143 | 1.9632674  |
| C | 0.2892971  | -3.7404461 | 1.1745271  |
| C | 2.4007803  | -2.4564081 | 2.4715538  |
| C | 1.3481648  | -4.4831262 | 1.6894722  |
| C | 2.4064832  | -3.8435923 | 2.3404102  |
| C | -2.1150138 | -2.1005556 | 1.4541907  |
| C | -2.3713155 | -1.8405235 | 2.8021276  |
| C | -2.9903514 | -2.8896208 | 0.7075307  |
| C | -3.5313005 | -2.3408949 | 3.3900582  |
| C | -4.1570797 | -3.3762566 | 1.2965076  |
| C | -4.4317747 | -3.0974226 | 2.6359848  |
| W | -3.1199954 | 0.3863919  | -1.3221638 |
| C | -2.6868795 | 2.3706548  | -0.9237583 |
| O | -2.5728786 | 3.5125891  | -0.8157292 |
| C | -3.7636724 | -1.4566934 | -1.9574564 |
| O | -4.1841695 | -2.4420955 | -2.3932269 |
| C | -4.8475664 | 1.0893024  | -2.1002601 |
| O | -5.8387508 | 1.4841371  | -2.5480426 |
| C | -4.1118374 | 0.1946754  | 0.4786497  |
| O | -4.7508167 | 0.1287755  | 1.4373237  |
| H | 1.3080131  | -0.6331366 | 2.0948890  |
| H | -0.5379849 | -4.2333074 | 0.6753485  |
| H | 3.2138207  | -1.9507609 | 2.9820716  |
| H | 1.3497083  | -5.5628255 | 1.5754531  |
| H | 3.2293705  | -4.4258080 | 2.7436553  |
| H | -1.6617957 | -1.2635170 | 3.3869263  |
| H | -2.7404628 | -3.1401964 | -0.3164268 |
| H | -3.7343427 | -2.1340299 | 4.4363812  |
| H | -4.8411980 | -3.9826848 | 0.7107922  |
| H | -5.3391240 | -3.4776616 | 3.0952448  |
| C | 2.3875266  | -0.4713378 | -3.1906017 |
| O | 1.9683565  | -0.5229845 | -4.2640580 |
| C | -2.2467520 | 0.6044156  | -3.1781090 |
| O | -1.8186684 | 0.7210351  | -4.2428884 |

**9ac<sup>-</sup>** {[W(CO)<sub>5</sub>]PNPh<sub>2</sub>]<sub>2</sub>Cl<sup>-</sup> (P-P-Cl)

71

Energy = -3448.572295063

|    |            |            |           |
|----|------------|------------|-----------|
| P  | 0.6511862  | 0.7449523  | 0.2501776 |
| Cl | -0.6308993 | 2.3876327  | 0.9825181 |
| N  | 1.5020080  | 0.3038067  | 1.6819613 |
| C  | 2.5162099  | 1.1357517  | 2.2408535 |
| C  | 3.5722431  | 0.5509840  | 2.9619796 |
| C  | 2.5050174  | 2.5290943  | 2.0731582 |
| C  | 4.5910417  | 1.3421692  | 3.4838751 |
| H  | 3.5992320  | -0.5237804 | 3.1012814 |
| C  | 3.5346441  | 3.3103771  | 2.5958856 |
| H  | 1.6831847  | 3.0039582  | 1.5551290 |
| C  | 4.5854008  | 2.7276513  | 3.3022962 |
| H  | 5.4027707  | 0.8660099  | 4.0273070 |
| H  | 3.5040413  | 4.3865257  | 2.4484563 |



|   |            |            |            |
|---|------------|------------|------------|
| C | -2.2663906 | 3.0087966  | -4.6625535 |
| C | 0.0317026  | 2.9195509  | -5.3972731 |
| C | -1.2293869 | 3.5174274  | -5.4450705 |
| C | 0.1134699  | -0.9835727 | -3.5493658 |
| C | 0.8974419  | -1.8044676 | -2.7286844 |
| C | -0.0359889 | -1.3099614 | -4.9054539 |
| C | 1.5003646  | -2.9515981 | -3.2438051 |
| C | 0.5839458  | -2.4455209 | -5.4158603 |
| C | 1.3478741  | -3.2771078 | -4.5901873 |
| W | -2.3603174 | -1.7438701 | -0.4677759 |
| C | -3.8819467 | -0.6737954 | -1.3420751 |
| O | -4.7305723 | -0.0730776 | -1.8473117 |
| C | -0.8312307 | -2.8747721 | 0.3382392  |
| O | -0.0177610 | -3.5720901 | 0.7676688  |
| C | -3.6949743 | -3.1438200 | 0.1338253  |
| O | -4.4726910 | -3.9319784 | 0.4730592  |
| C | -2.7292849 | -0.7754485 | 1.3089011  |
| O | -3.0169940 | -0.2698121 | 2.3077309  |
| H | -2.8710411 | 1.4711402  | -3.2766057 |
| H | 1.2393261  | 1.3574486  | -4.5275894 |
| H | -3.2510662 | 3.4655914  | -4.6946766 |
| H | 0.8489404  | 3.3220596  | -5.9874194 |
| H | -1.4000727 | 4.3795184  | -6.0825907 |
| H | 1.0385763  | -1.5547789 | -1.6793444 |
| H | -0.6462988 | -0.6819812 | -5.5455747 |
| H | 2.0967603  | -3.5786261 | -2.5891095 |
| H | 0.4550267  | -2.6919334 | -6.4657883 |
| H | 1.8204708  | -4.1665636 | -4.9948748 |
| C | 2.7047958  | -1.8456252 | 0.4379788  |
| O | 2.9535820  | -2.8378548 | -0.1003250 |
| C | -2.1556247 | -2.8258665 | -2.2215940 |
| O | -2.1192816 | -3.4787156 | -3.1704569 |

**9a<sup>-</sup>** {[W(CO)<sub>5</sub>]PNPh<sub>2</sub>}<sub>2</sub>H<sup>-</sup> (P-P-H)

71

Energy = -2988.903040015

|   |           |            |            |
|---|-----------|------------|------------|
| P | 0.9760502 | 0.0396269  | 0.3108978  |
| H | 1.0046540 | 0.3165555  | 1.6927728  |
| N | 2.1844402 | -1.2236909 | 0.3170514  |
| C | 2.3208829 | -2.0318711 | 1.4913900  |
| C | 2.7415976 | -1.4504238 | 2.6916062  |
| C | 2.0108958 | -3.3957594 | 1.4486903  |
| C | 2.8384682 | -2.2271787 | 3.8459411  |
| H | 2.9952809 | -0.3943540 | 2.7152509  |
| C | 2.1214006 | -4.1686386 | 2.6014668  |
| H | 1.6715381 | -3.8359661 | 0.5170923  |
| C | 2.5305792 | -3.5889107 | 3.8053456  |
| H | 3.1648018 | -1.7683166 | 4.7751669  |
| H | 1.8642123 | -5.2235547 | 2.5621747  |
| H | 2.6062703 | -4.1925892 | 4.7053724  |
| C | 2.6830857 | -1.7221905 | -0.9088897 |

|   |            |            |            |
|---|------------|------------|------------|
| C | 2.0227471  | -1.4703945 | -2.1180201 |
| C | 3.8887703  | -2.4435357 | -0.9324468 |
| C | 2.5725992  | -1.8928916 | -3.3274709 |
| H | 1.0589555  | -0.9707947 | -2.1144340 |
| C | 4.4159772  | -2.8868338 | -2.1404551 |
| H | 4.4090555  | -2.6428720 | -0.0012497 |
| C | 3.7695141  | -2.6066578 | -3.3493918 |
| H | 2.0435565  | -1.6771828 | -4.2515402 |
| H | 5.3503435  | -3.4421475 | -2.1388728 |
| H | 4.1914260  | -2.9467238 | -4.2906563 |
| W | 1.8750029  | 2.1793593  | -0.8705731 |
| C | 1.5559671  | 1.5995638  | -2.8213748 |
| O | 1.4142568  | 1.3421728  | -3.9408410 |
| C | 0.0655454  | 3.1603916  | -0.8659914 |
| O | -0.9025426 | 3.7935832  | -0.8977471 |
| C | 2.7114257  | 3.8726190  | -1.5411807 |
| O | 3.2135737  | 4.8577035  | -1.9103741 |
| C | 2.2372990  | 2.7701283  | 1.0640818  |
| O | 2.4672527  | 3.0945041  | 2.1513249  |
| C | 3.7338160  | 1.2912203  | -0.9187821 |
| O | 4.8007152  | 0.8477471  | -0.9478649 |
| P | -0.9318993 | -1.0698748 | 0.6056898  |
| N | -1.1963211 | -1.9658088 | -0.8821087 |
| C | -0.8711130 | -3.3538686 | -0.8251903 |
| C | -0.1605596 | -3.9677666 | -1.8674814 |
| C | -1.2098696 | -4.1120360 | 0.3046297  |
| C | 0.2275151  | -5.3015988 | -1.7639556 |
| H | 0.1057166  | -3.3885601 | -2.7437486 |
| C | -0.8151137 | -5.4452375 | 0.4044248  |
| H | -1.7614590 | -3.6393235 | 1.1107500  |
| C | -0.0895528 | -6.0482340 | -0.6254054 |
| H | 0.7987519  | -5.7528036 | -2.5709477 |
| H | -1.0777520 | -6.0134593 | 1.2926703  |
| H | 0.2240804  | -7.0850635 | -0.5437174 |
| C | -1.6918188 | -1.4215695 | -2.0865991 |
| C | -2.4764999 | -2.1963033 | -2.9600481 |
| C | -1.4310322 | -0.0858016 | -2.4196267 |
| C | -2.9671689 | -1.6440511 | -4.1387321 |
| H | -2.7011909 | -3.2266404 | -2.7045053 |
| C | -1.9292224 | 0.4605868  | -3.6003613 |
| H | -0.8364059 | 0.5202148  | -1.7424574 |
| C | -2.6974213 | -0.3115311 | -4.4703709 |
| H | -3.5765511 | -2.2566451 | -4.7985645 |
| H | -1.7137125 | 1.4984884  | -3.8361559 |
| H | -3.0848618 | 0.1157608  | -5.3908007 |
| W | -2.8652976 | 0.5305821  | 1.2439186  |
| C | -3.2338656 | 1.5763517  | -0.4978004 |
| O | -3.5790827 | 2.2203495  | -1.3966904 |
| C | -4.0011179 | -1.0157808 | 0.5040745  |
| O | -4.6113697 | -1.9043610 | 0.0797757  |
| C | -4.4576140 | 1.4989933  | 1.9843580  |

|   |            |            |           |
|---|------------|------------|-----------|
| O | -5.3913055 | 2.0532277  | 2.4176509 |
| C | -2.6964616 | -0.4139053 | 3.0609176 |
| O | -2.6433426 | -0.9235636 | 4.1008249 |
| C | -1.5769191 | 1.9825305  | 1.9164128 |
| O | -0.8663974 | 2.8011585  | 2.3309127 |

**9b0W<sup>-</sup>** [W(CO)<sub>5</sub>]PNCy<sub>2</sub>PHNCy<sub>2</sub><sup>-</sup>

84

Energy = -2369.057247372

|   |            |            |            |
|---|------------|------------|------------|
| P | -1.2223756 | -0.0590101 | -0.2624043 |
| N | -1.8846224 | 0.9150594  | 0.9865264  |
| C | -3.2602847 | 1.3961497  | 0.7522739  |
| C | -4.3251085 | 0.4220057  | 1.2900643  |
| C | -3.5091068 | 2.8121696  | 1.2944976  |
| H | -3.3682484 | 1.4352161  | -0.3395795 |
| C | -5.7464625 | 0.8996971  | 0.9599854  |
| H | -4.2113319 | 0.3317682  | 2.3803660  |
| H | -4.1410976 | -0.5704154 | 0.8602979  |
| C | -4.9253188 | 3.2892302  | 0.9401688  |
| H | -3.4004513 | 2.8175284  | 2.3879123  |
| H | -2.7581015 | 3.4941161  | 0.8868595  |
| C | -5.9891287 | 2.3232153  | 1.4784692  |
| H | -6.4879304 | 0.2073981  | 1.3788243  |
| H | -5.8815904 | 0.8890166  | -0.1314225 |
| H | -5.0907306 | 4.2983894  | 1.3378561  |
| H | -5.0191868 | 3.3577441  | -0.1531290 |
| H | -6.9931741 | 2.6650712  | 1.1969959  |
| H | -5.9478619 | 2.3194451  | 2.5776741  |
| C | -1.3979105 | 0.9639881  | 2.3819859  |
| C | -0.9129587 | -0.3895408 | 2.9123174  |
| C | -0.3024383 | 2.0280236  | 2.5439005  |
| H | -2.2560908 | 1.2607531  | 3.0015098  |
| C | -0.4431961 | -0.2799294 | 4.3690368  |
| H | -0.0753065 | -0.7244441 | 2.2888701  |
| H | -1.7139054 | -1.1324619 | 2.8147352  |
| C | 0.1845886  | 2.1352624  | 3.9936975  |
| H | 0.5345884  | 1.7398424  | 1.8965412  |
| H | -0.6774298 | 2.9913211  | 2.1818526  |
| C | 0.6640245  | 0.7728760  | 4.5115271  |
| H | -0.0877241 | -1.2574453 | 4.7196396  |
| H | -1.2916892 | -0.0002338 | 5.0118929  |
| H | 0.9900185  | 2.8770651  | 4.0625780  |
| H | -0.6363545 | 2.4940909  | 4.6336815  |
| H | 0.9864683  | 0.8500128  | 5.5578257  |
| H | 1.5362547  | 0.4538823  | 3.9233545  |
| H | -1.0865216 | -1.3383324 | 0.3730837  |
| P | 1.0066007  | 0.2885731  | -0.2122812 |
| N | 1.4543693  | -1.1203249 | -1.1126807 |
| W | 1.4281581  | 2.5186095  | -1.6100832 |
| C | -0.5180333 | 3.1319263  | -1.3815435 |
| O | -1.6184645 | 3.5052943  | -1.3548657 |

|   |            |            |            |
|---|------------|------------|------------|
| C | 1.9910688  | 3.3428872  | 0.1878623  |
| O | 2.3350223  | 3.8509949  | 1.1752770  |
| C | 1.9098687  | 4.2310801  | -2.5110356 |
| O | 2.1949223  | 5.2362527  | -3.0486735 |
| C | 3.3013341  | 1.7304848  | -1.8731080 |
| O | 4.3619277  | 1.2797662  | -2.0294873 |
| C | 0.8236442  | 1.7995176  | -3.4309608 |
| O | 0.4590874  | 1.4996590  | -4.4961868 |
| C | 0.9713111  | -1.4198994 | -2.4647288 |
| C | 2.1200256  | -1.5499905 | -3.4812510 |
| C | 0.0552243  | -2.6573329 | -2.5156649 |
| H | 0.3618373  | -0.5561067 | -2.7512761 |
| C | 1.6044757  | -1.8362161 | -4.8994230 |
| H | 2.7873492  | -2.3660429 | -3.1693366 |
| H | 2.7105935  | -0.6278072 | -3.4624601 |
| C | -0.4622444 | -2.9163843 | -3.9370957 |
| H | 0.6131832  | -3.5396543 | -2.1697465 |
| H | -0.7782929 | -2.5053066 | -1.8205666 |
| C | 0.6985655  | -3.0737500 | -4.9275143 |
| H | 2.4501181  | -1.9650672 | -5.5872194 |
| H | 1.0332819  | -0.9685477 | -5.2546217 |
| H | -1.1015929 | -3.8084921 | -3.9500173 |
| H | -1.0898791 | -2.0692502 | -4.2492387 |
| H | 0.3155851  | -3.2416615 | -5.9422565 |
| H | 1.2865600  | -3.9627529 | -4.6548250 |
| C | 2.2585571  | -2.1531360 | -0.4362443 |
| C | 3.6211216  | -1.6062303 | 0.0176357  |
| C | 1.5153078  | -2.7958683 | 0.7464083  |
| H | 2.4474593  | -2.9392675 | -1.1807920 |
| C | 4.4631341  | -2.6697836 | 0.7350342  |
| H | 3.4307666  | -0.7598699 | 0.6926381  |
| H | 4.1533199  | -1.2080870 | -0.8527009 |
| C | 2.3608562  | -3.8593667 | 1.4584883  |
| H | 1.2636234  | -1.9906727 | 1.4494911  |
| H | 0.5691290  | -3.2193017 | 0.3912439  |
| C | 3.7027637  | -3.2776960 | 1.9207260  |
| H | 5.4120027  | -2.2329337 | 1.0720103  |
| H | 4.7181882  | -3.4729116 | 0.0267541  |
| H | 1.8071954  | -4.2714143 | 2.3121652  |
| H | 2.5520101  | -4.6970090 | 0.7705569  |
| H | 4.3089921  | -4.0515595 | 2.4088974  |
| H | 3.5156301  | -2.4937702 | 2.6690359  |

**9bHww** {[W(CO)<sub>5</sub>]PHNCy<sub>2</sub>]<sub>2</sub> (PH-PH)

96

Energy = -3003.883790195

|   |            |            |            |
|---|------------|------------|------------|
| P | -0.9871575 | -0.2446888 | 0.3632371  |
| N | -1.5948634 | 0.7391513  | 1.5687590  |
| W | -2.4390612 | -1.4630482 | -1.2957107 |
| C | -3.6161207 | 0.1735311  | -1.7117250 |
| O | -4.2814015 | 1.0570585  | -1.9881005 |



|   |            |            |            |
|---|------------|------------|------------|
| C | 2.0792334  | -3.3317340 | 0.7228461  |
| C | 4.2769640  | -2.0928346 | 0.7127572  |
| H | 2.6959711  | -1.8499328 | 2.1419199  |
| C | 2.7497900  | -4.5220161 | 1.4213544  |
| H | 2.1208200  | -3.4719058 | -0.3665548 |
| H | 1.0209539  | -3.2565067 | 0.9981349  |
| C | 4.9495818  | -3.2808623 | 1.4149240  |
| H | 4.3698848  | -2.2050883 | -0.3770535 |
| H | 4.7685520  | -1.1515047 | 0.9837482  |
| C | 4.2421502  | -4.5987061 | 1.0727408  |
| H | 2.2426275  | -5.4540526 | 1.1435639  |
| H | 2.6390648  | -4.4120586 | 2.5101017  |
| H | 6.0090574  | -3.3307644 | 1.1359677  |
| H | 4.9141068  | -3.1249957 | 2.5032166  |
| H | 4.7146871  | -5.4337868 | 1.6040284  |
| H | 4.3518004  | -4.7979810 | -0.0029465 |
| C | 1.7018237  | 0.2686552  | 1.2862384  |
| C | 0.6585909  | -0.1387027 | 2.3382561  |
| C | 2.8988421  | 0.9723448  | 1.9461433  |
| H | 1.2156191  | 0.9889805  | 0.6159266  |
| C | 0.1986945  | 1.0787235  | 3.1528934  |
| H | 1.0908816  | -0.8836200 | 3.0203201  |
| H | -0.1883109 | -0.6142349 | 1.8332484  |
| C | 2.4405597  | 2.1857330  | 2.7689668  |
| H | 3.4174275  | 0.2617625  | 2.6049816  |
| H | 3.6125516  | 1.2777558  | 1.1716834  |
| C | 1.3888491  | 1.7875047  | 3.8132273  |
| H | -0.5304416 | 0.7682060  | 3.9109642  |
| H | -0.3165136 | 1.7840722  | 2.4849772  |
| H | 3.3033719  | 2.6566372  | 3.2553414  |
| H | 2.0080426  | 2.9355914  | 2.0910935  |
| H | 1.0467680  | 2.6727487  | 4.3630355  |
| H | 1.8481583  | 1.1110129  | 4.5484864  |
| C | -2.2202710 | -1.5118614 | -1.6629050 |
| C | -2.2770322 | -1.5851992 | -0.1310035 |
| C | -3.1432268 | -0.3982020 | -2.1831042 |
| H | -2.5886495 | -2.4665883 | -2.0589373 |
| C | -3.7141797 | -1.7652047 | 0.3750729  |
| H | -1.8592093 | -0.6510799 | 0.2700833  |
| H | -1.6311417 | -2.4010064 | 0.2136367  |
| C | -4.5821817 | -0.5800814 | -1.6802729 |
| H | -2.7471826 | 0.5656928  | -1.8326989 |
| H | -3.1128947 | -0.3811835 | -3.2785942 |
| C | -4.6293632 | -0.6503203 | -0.1482810 |
| H | -3.7253178 | -1.7870561 | 1.4716624  |
| H | -4.0990362 | -2.7373243 | 0.0338212  |
| H | -5.2135192 | 0.2387652  | -2.0460014 |
| H | -4.9957622 | -1.5105627 | -2.0962214 |
| H | -5.6588857 | -0.8110729 | 0.1939983  |
| H | -4.2988323 | 0.3126018  | 0.2669553  |
| C | -0.3455126 | -2.3612875 | -3.1376039 |

|   |            |            |            |
|---|------------|------------|------------|
| C | -0.3203488 | -3.7933755 | -2.5810709 |
| C | -1.1184201 | -2.2999994 | -4.4650939 |
| H | 0.6952969  | -2.0795082 | -3.3413947 |
| C | 0.2665616  | -4.7725757 | -3.6076025 |
| H | -1.3413466 | -4.1096750 | -2.3268358 |
| H | 0.2621348  | -3.8034490 | -1.6541047 |
| C | -0.5372053 | -3.2848169 | -5.4906935 |
| H | -2.1729937 | -2.5487648 | -4.2810679 |
| H | -1.0895967 | -1.2751406 | -4.8540413 |
| C | -0.4998131 | -4.7151324 | -4.9358373 |
| H | 0.2535737  | -5.7916558 | -3.2025532 |
| H | 1.3201449  | -4.5146128 | -3.7873968 |
| H | -1.1226734 | -3.2494262 | -6.4174273 |
| H | 0.4851437  | -2.9724622 | -5.7474813 |
| H | -0.0432018 | -5.3928906 | -5.6673025 |
| H | -1.5291712 | -5.0659486 | -4.7729173 |

**9bw0<sup>-</sup>** [W(CO)<sub>5</sub>]PHNCy<sub>2</sub>PNCy<sub>2</sub><sup>-</sup>  
84

Energy = -2369.052935256

|   |            |            |            |
|---|------------|------------|------------|
| P | 1.1805275  | -0.0192028 | -0.7854496 |
| H | 0.1574417  | 0.2634279  | 0.1437947  |
| N | 1.9312944  | -1.2609777 | 0.1639122  |
| W | 2.3545812  | 2.2240711  | -1.4406629 |
| C | 3.8851568  | 2.2172653  | -0.0940347 |
| O | 4.7734175  | 2.3268442  | 0.6542646  |
| C | 3.4728912  | 1.1131631  | -2.7609900 |
| O | 4.1199700  | 0.4666830  | -3.4776067 |
| C | 3.0661921  | 3.9977140  | -2.0349684 |
| O | 3.4802896  | 5.0411351  | -2.3722481 |
| C | 0.8246359  | 2.4948954  | -2.8263304 |
| O | 0.0195060  | 2.8444887  | -3.5846958 |
| C | 1.1288024  | 2.9650810  | 0.0178196  |
| O | 0.4156638  | 3.3186057  | 0.8669546  |
| P | 0.3559673  | -0.6472603 | -2.6817118 |
| N | -1.1485484 | -1.4807431 | -2.4414297 |
| C | 3.0656415  | -1.9349835 | -0.4900318 |
| C | 4.4422679  | -1.3585404 | -0.1227270 |
| C | 3.0316959  | -3.4502772 | -0.2511270 |
| H | 2.9031101  | -1.7740365 | -1.5669545 |
| C | 5.5630124  | -2.0658184 | -0.8970465 |
| H | 4.6131116  | -1.4816107 | 0.9565066  |
| H | 4.4488386  | -0.2852833 | -0.3330198 |
| C | 4.1516983  | -4.1591599 | -1.0245446 |
| H | 3.1456644  | -3.6584257 | 0.8226816  |
| H | 2.0508717  | -3.8302579 | -0.5513343 |
| C | 5.5277007  | -3.5822504 | -0.6653570 |
| H | 6.5387642  | -1.6570405 | -0.6058395 |
| H | 5.4388138  | -1.8610351 | -1.9696283 |
| H | 4.1239976  | -5.2375795 | -0.8236351 |
| H | 3.9770261  | -4.0304239 | -2.1025429 |



H 6.3128553 -4.0761985 -1.2517060  
 H 5.7394427 -3.7902698 0.3938182  
 C 1.9196446 -1.2277059 1.6421722  
 C 2.3171929 0.1305963 2.2427193  
 C 0.5674823 -1.6978751 2.2007196  
 H 2.6734913 -1.9593964 1.9646519  
 C 2.3060693 0.0998508 3.7765090  
 H 1.6122222 0.8947307 1.8913948  
 H 3.3049922 0.4167503 1.8719238  
 C 0.5605809 -1.7162349 3.7350576  
 H -0.2226503 -1.0265454 1.8381499  
 H 0.3449489 -2.6927195 1.8031202  
 C 0.9412474 -0.3479612 4.3128075  
 H 2.5691666 1.0892192 4.1704000  
 H 3.0787007 -0.5980935 4.1321074  
 H -0.4255547 -2.0288271 4.0997940  
 H 1.2817011 -2.4670469 4.0905475  
 H 0.9523788 -0.3844497 5.4091365  
 H 0.1801546 0.3908744 4.0231865  
 C -2.3866867 -0.6894012 -2.2572193  
 C -2.3575491 0.2621466 -1.0492861  
 C -2.7085867 0.1043944 -3.5352483  
 H -3.1954712 -1.4183539 -2.0939697  
 C -3.6576618 1.0659359 -0.9149388  
 H -1.5165990 0.9529177 -1.1940304  
 H -2.1569832 -0.3070426 -0.1341890  
 C -3.9995344 0.9244007 -3.4081558  
 H -1.8574089 0.7714509 -3.7281763  
 H -2.7719661 -0.5955428 -4.3779680  
 C -3.9451770 1.8610692 -2.1945343  
 H -3.5904841 1.7415642 -0.0524120  
 H -4.4977494 0.3822534 -0.7190768  
 H -4.1706407 1.4990541 -4.3276946  
 H -4.8569891 0.2434433 -3.2948502  
 H -4.8856127 2.4185004 -2.0979078  
 H -3.1449205 2.5992027 -2.3460084  
 C -1.2769812 -2.9175963 -2.1523737  
 C -0.3030891 -3.7684356 -2.9719130  
 C -1.1157533 -3.2358955 -0.6571737  
 H -2.2971803 -3.2044615 -2.4580453  
 C -0.5176072 -5.2653535 -2.7029667  
 H 0.7223010 -3.4777441 -2.7075479  
 H -0.4339544 -3.5395201 -4.0364162  
 C -1.3102202 -4.7288396 -0.3600056  
 H -0.1097066 -2.9109731 -0.3629156  
 H -1.8270619 -2.6373300 -0.0750323  
 C -0.3716502 -5.5946423 -1.2109260  
 H 0.1932659 -5.8582540 -3.2922948  
 H -1.5252939 -5.5545539 -3.0369246  
 H -1.1464231 -4.9272269 0.7076636  
 H -2.3519721 -5.0089504 -0.5774430

H -0.5693095 -6.6596986 -1.0336500  
 H 0.6665257 -5.4083326 -0.9037834

**9bwW<sup>-</sup>** {[W(CO)<sub>5</sub>]PNCy<sub>2</sub>}<sub>2</sub>H<sup>-</sup> (P-P-H)  
 95

Energy = -3003.384415783

P -1.0838080 -0.2944239 0.4125416  
 N -1.8246712 0.7352604 1.5465282  
 W -2.4843530 -1.6717633 -1.2600682  
 C -3.7118778 -0.1407650 -1.8608909  
 O -4.4213398 0.6970038 -2.2427926  
 C -1.2096732 -1.2253688 -2.8408483  
 O -0.6132405 -1.0792893 -3.8219507  
 C -3.4278099 -2.9327076 -2.5192694  
 O -3.9768496 -3.6741053 -3.2269040  
 C -1.2377290 -3.1875806 -0.6457367  
 O -0.5601583 -4.0544003 -0.2825816  
 C -3.7900472 -2.2473764 0.2016827  
 O -4.5430010 -2.6415453 0.9955444  
 C -3.0697182 1.4395324 1.1865882  
 C -4.3066348 0.8937291 1.9191541  
 C -2.9796479 2.9601875 1.3795634  
 H -3.2049158 1.2510914 0.1160471  
 C -5.5888749 1.5784300 1.4249011  
 H -4.1950803 1.0749859 2.9973464  
 H -4.3696160 -0.1872319 1.7753679  
 C -4.2589452 3.6540478 0.8891472  
 H -2.8250181 3.1876153 2.4437531  
 H -2.1118418 3.3450366 0.8387067  
 C -5.5040186 3.1002806 1.5923767  
 H -6.4557769 1.1802880 1.9660753  
 H -5.7374186 1.3389821 0.3629673  
 H -4.1785745 4.7366368 1.0458429  
 H -4.3559808 3.4944545 -0.1943793  
 H -6.4086897 3.5792285 1.1981676  
 H -5.4517939 3.3433243 2.6636178  
 C -1.4316116 0.6943514 2.9736184  
 C -1.8229177 -0.6222119 3.6710746  
 C 0.0639880 0.9752292 3.1574264  
 H -1.9867451 1.5097037 3.4572470  
 C -1.4317804 -0.6030004 5.1553329  
 H -1.3062278 -1.4540334 3.1755865  
 H -2.8968438 -0.7968221 3.5552575  
 C 0.4656237 0.9751643 4.6372027  
 H 0.6396798 0.2141731 2.6147328  
 H 0.3087197 1.9347664 2.6966166  
 C 0.0685539 -0.3352135 5.3272377  
 H -1.7088302 -1.5548033 5.6247404  
 H -2.0010236 0.1844535 5.6713493  
 H 1.5450252 1.1448471 4.7233552  
 H -0.0315361 1.8147156 5.1454762

|   |            |            |            |
|---|------------|------------|------------|
| H | 0.3305933  | -0.2993742 | 6.3918575  |
| H | 0.6352228  | -1.1642483 | 4.8819210  |
| H | -0.5307490 | -1.2264298 | 1.3118731  |
| P | 0.8404788  | 0.3005365  | -0.7172532 |
| N | 1.0088828  | 1.9973177  | -0.7714566 |
| W | 2.8887539  | -0.9626908 | 0.3467119  |
| C | 1.8358731  | -2.0766372 | 1.7108923  |
| O | 1.2937728  | -2.7371032 | 2.4988910  |
| C | 2.3862293  | -2.3132529 | -1.1277613 |
| O | 2.1224348  | -3.0717628 | -1.9619555 |
| C | 4.5294825  | -2.0158154 | 0.7928414  |
| O | 5.5002359  | -2.6190987 | 1.0501436  |
| C | 3.9423570  | 0.1164601  | -1.0494099 |
| O | 4.5500600  | 0.6828786  | -1.8594876 |
| C | 3.3697684  | 0.3465177  | 1.8518681  |
| O | 3.6932800  | 1.0221040  | 2.7420404  |
| C | 1.6451502  | 2.8318610  | 0.2570722  |
| C | 2.9003011  | 3.5529562  | -0.2632327 |
| C | 0.6827125  | 3.8436906  | 0.8966757  |
| H | 1.9558893  | 2.1310821  | 1.0370979  |
| C | 3.5889333  | 4.3524200  | 0.8528578  |
| H | 2.6143133  | 4.2369239  | -1.0752057 |
| H | 3.5877531  | 2.8175952  | -0.6894260 |
| C | 1.3690328  | 4.6331585  | 2.0195853  |
| H | 0.3219432  | 4.5455225  | 0.1313313  |
| H | -0.1894606 | 3.3066365  | 1.2773756  |
| C | 2.6234216  | 5.3501509  | 1.5048661  |
| H | 4.4664194  | 4.8753192  | 0.4523386  |
| H | 3.9545278  | 3.6550061  | 1.6189041  |
| H | 0.6662176  | 5.3531951  | 2.4573135  |
| H | 1.6561804  | 3.9390073  | 2.8226847  |
| H | 3.1218606  | 5.8831510  | 2.3241465  |
| H | 2.3269961  | 6.1059132  | 0.7627501  |
| C | 0.4340070  | 2.6927524  | -1.9443939 |
| C | 1.1134796  | 2.2637558  | -3.2532461 |
| C | -1.0847665 | 2.4936381  | -2.0288000 |
| H | 0.6278560  | 3.7637547  | -1.7979254 |
| C | 0.5019897  | 2.9727066  | -4.4692784 |
| H | 0.9934605  | 1.1769615  | -3.3510206 |
| H | 2.1887381  | 2.4654592  | -3.1814818 |
| C | -1.6967988 | 3.1938179  | -3.2474292 |
| H | -1.2760877 | 1.4123230  | -2.0847653 |
| H | -1.5466970 | 2.8514364  | -1.1029425 |
| C | -1.0134541 | 2.7419373  | -4.5443511 |
| H | 0.9874300  | 2.6230690  | -5.3890945 |
| H | 0.6961474  | 4.0539269  | -4.3993295 |
| H | -2.7740999 | 2.9930173  | -3.2896917 |
| H | -1.5789512 | 4.2825191  | -3.1387965 |
| H | -1.4385746 | 3.2748763  | -5.4042259 |
| H | -1.2068008 | 1.6716746  | -4.6987119 |

**9b<sup>-</sup>** PHNCy<sub>2</sub>PNCy<sub>2</sub><sup>-</sup>

73

Energy = -1734.712172121

|   |            |            |            |
|---|------------|------------|------------|
| P | 0.6474595  | -2.8495822 | 0.3110697  |
| H | 1.1439743  | -4.1566708 | 0.6159398  |
| N | 1.7901243  | -2.1042405 | 1.4205629  |
| P | 1.2125208  | -2.6621711 | -1.8104597 |
| N | -0.2497298 | -2.0458624 | -2.5591885 |
| C | 3.2186730  | -2.4360435 | 1.2965531  |
| C | 4.0279590  | -1.4791941 | 0.4023300  |
| C | 3.8955424  | -2.5884447 | 2.6700857  |
| H | 3.2415790  | -3.4243757 | 0.8162897  |
| C | 5.4788928  | -1.9561034 | 0.2513957  |
| H | 4.0240191  | -0.4760362 | 0.8536345  |
| H | 3.5210632  | -1.4119483 | -0.5677981 |
| C | 5.3506258  | -3.0591132 | 2.5230710  |
| H | 3.8816151  | -1.6244759 | 3.1983846  |
| H | 3.3159169  | -3.2964251 | 3.2744598  |
| C | 6.1565616  | -2.1158823 | 1.6190614  |
| H | 6.0473820  | -1.2573345 | -0.3760041 |
| H | 5.4849201  | -2.9256305 | -0.2684544 |
| H | 5.8246627  | -3.1398752 | 3.5098729  |
| H | 5.3577178  | -4.0672229 | 2.0832076  |
| H | 7.1817319  | -2.4896785 | 1.4989732  |
| H | 6.2293639  | -1.1299219 | 2.1015216  |
| C | 1.4768063  | -0.7650626 | 1.9442359  |
| C | 1.1319400  | 0.2754668  | 0.8629477  |
| C | 0.3413950  | -0.8391589 | 2.9769782  |
| H | 2.3767686  | -0.4119049 | 2.4688315  |
| C | 0.8392873  | 1.6519565  | 1.4732781  |
| H | 0.2467694  | -0.0820057 | 0.3236792  |
| H | 1.9387149  | 0.3287749  | 0.1257482  |
| C | 0.0221960  | 0.5341313  | 3.5836713  |
| H | -0.5456292 | -1.2441465 | 2.4703116  |
| H | 0.6214468  | -1.5550071 | 3.7590979  |
| C | -0.3012263 | 1.5665771  | 2.4953508  |
| H | 0.5898280  | 2.3713843  | 0.6822833  |
| H | 1.7438772  | 2.0317891  | 1.9725599  |
| H | -0.8128726 | 0.4506099  | 4.2913531  |
| H | 0.8917247  | 0.8852205  | 4.1601322  |
| H | -0.4910619 | 2.5495633  | 2.9456802  |
| H | -1.2227058 | 1.2662813  | 1.9762244  |
| C | -0.6196758 | -0.6336267 | -2.4275962 |
| C | -0.8820511 | 0.0390502  | -3.7892307 |
| C | -1.8091230 | -0.3853716 | -1.4775282 |
| H | 0.2629824  | -0.1516962 | -1.9875410 |
| C | -1.1854597 | 1.5365885  | -3.6324244 |
| H | -1.7333661 | -0.4505670 | -4.2843918 |
| H | -0.0047484 | -0.1156293 | -4.4288160 |
| C | -2.1096657 | 1.1118366  | -1.3218428 |
| H | -2.7010294 | -0.8889322 | -1.8784386 |

|   |            |            |            |
|---|------------|------------|------------|
| H | -1.5865875 | -0.8496936 | -0.5094648 |
| C | -2.3691074 | 1.7684760  | -2.6838399 |
| H | -1.3858166 | 1.9910622  | -4.6117631 |
| H | -0.2975422 | 2.0410676  | -3.2232481 |
| H | -2.9684520 | 1.2628315  | -0.6543801 |
| H | -1.2495166 | 1.6039560  | -0.8464524 |
| H | -2.5568575 | 2.8433557  | -2.5626131 |
| H | -3.2766704 | 1.3324268  | -3.1275414 |
| C | -1.3083063 | -2.9500102 | -3.0371233 |
| C | -0.8060210 | -3.8203360 | -4.2005688 |
| C | -1.9133866 | -3.8398458 | -1.9370746 |
| H | -2.1178451 | -2.3157359 | -3.4297521 |
| C | -1.8892080 | -4.7644252 | -4.7399537 |
| H | 0.0525590  | -4.3968673 | -3.8276969 |
| H | -0.4329290 | -3.1631177 | -4.9960144 |
| C | -3.0089034 | -4.7672159 | -2.4802798 |
| H | -1.0938069 | -4.4338893 | -1.5094524 |
| H | -2.2946328 | -3.2085696 | -1.1272615 |
| C | -2.4738398 | -5.6392123 | -3.6233824 |
| H | -1.4794515 | -5.3924391 | -5.5423646 |
| H | -2.7014930 | -4.1706333 | -5.1866727 |
| H | -3.4062463 | -5.3975671 | -1.6736414 |
| H | -3.8510624 | -4.1647420 | -2.8550693 |
| H | -3.2671742 | -6.2869491 | -4.0193289 |
| H | -1.6849130 | -6.2976327 | -3.2315048 |

**3a** [W(CO)<sub>5</sub>]PHOMeNPh<sub>2</sub>

41

Energy = -1609.903934296

|   |            |           |            |
|---|------------|-----------|------------|
| P | 0.5720613  | 0.2725614 | -0.4405475 |
| N | 0.5866596  | 1.7706749 | 0.3787283  |
| C | 1.7802049  | 2.5494709 | 0.3989339  |
| C | 2.6414307  | 2.5451866 | -0.7070556 |
| C | 2.1212862  | 3.2863765 | 1.5408760  |
| C | 3.8497936  | 3.2399261 | -0.6518021 |
| H | 2.3614725  | 2.0118720 | -1.6097861 |
| C | 3.3186537  | 3.9948441 | 1.5761734  |
| H | 1.4548785  | 3.2878128 | 2.3971742  |
| C | 4.1944555  | 3.9677055 | 0.4866394  |
| H | 4.5145190  | 3.2186615 | -1.5105787 |
| H | 3.5777833  | 4.5567058 | 2.4688409  |
| H | 5.1324590  | 4.5130082 | 0.5241607  |
| C | -0.5563547 | 2.2331563 | 1.1149486  |
| C | -1.1617010 | 1.4144421 | 2.0730758  |
| C | -1.0615283 | 3.5151011 | 0.8717927  |
| C | -2.2892164 | 1.8652745 | 2.7613164  |
| H | -0.7434505 | 0.4356244 | 2.2887840  |
| C | -2.1741061 | 3.9675082 | 1.5776859  |
| H | -0.5781758 | 4.1492721 | 0.1344636  |
| C | -2.7973055 | 3.1417649 | 2.5181586  |
| H | -2.7576167 | 1.2221703 | 3.5007091  |

|   |            |            |            |
|---|------------|------------|------------|
| H | -2.5622150 | 4.9629438  | 1.3825441  |
| H | -3.6682397 | 3.4945118  | 3.0623225  |
| W | 2.3926529  | -1.3760456 | -0.0153558 |
| C | 3.3216250  | -0.7661074 | -1.7534970 |
| O | 3.8330276  | -0.3971856 | -2.7207740 |
| C | 3.5947793  | -0.0786152 | 1.0581037  |
| O | 4.3133802  | 0.5734843  | 1.6821723  |
| C | 3.7762591  | -2.8267215 | 0.3128638  |
| O | 4.5555415  | -3.6656859 | 0.4938118  |
| C | 1.4052389  | -1.8460431 | 1.7242717  |
| O | 0.8388344  | -2.0826108 | 2.7054658  |
| C | 1.2562284  | -2.7322881 | -1.0619269 |
| O | 0.6294456  | -3.5093590 | -1.6454741 |
| H | -0.7361756 | -0.0778760 | -0.0431417 |
| O | 0.3553775  | 0.5524187  | -2.0303790 |
| C | -0.7422180 | 1.4094871  | -2.4447057 |
| H | -0.7955468 | 1.3313816  | -3.5304719 |
| H | -1.6805526 | 1.0689677  | -1.9932519 |
| H | -0.5369304 | 2.4416196  | -2.1485500 |

**3b** [W(CO)<sub>5</sub>]PHOMeNCy<sub>2</sub>

53

Energy = -1617.155996358

|   |            |            |            |
|---|------------|------------|------------|
| P | 1.6667184  | 1.0441143  | 0.7337534  |
| N | 0.8773862  | 1.7545698  | -0.5449004 |
| W | 1.3149936  | -1.4308459 | 1.1930342  |
| C | 3.1597912  | -1.4447071 | 2.1087670  |
| O | 4.1840221  | -1.4702321 | 2.6436920  |
| C | 0.4663880  | -0.8010254 | 2.9602910  |
| O | -0.0100812 | -0.4374412 | 3.9484947  |
| C | 1.0686346  | -3.3682420 | 1.7284837  |
| O | 0.9298781  | -4.4764459 | 2.0430372  |
| C | -0.5660597 | -1.4695045 | 0.3559309  |
| O | -1.6352999 | -1.5369150 | -0.0788799 |
| C | 2.1573411  | -2.0083073 | -0.5959942 |
| O | 2.6236772  | -2.3435586 | -1.6009529 |
| C | 0.5725364  | 0.9783124  | -1.7693729 |
| C | -0.9010011 | 1.0999824  | -2.1805959 |
| C | 1.5009136  | 1.3258963  | -2.9413272 |
| H | 0.7534341  | -0.0686083 | -1.4974746 |
| C | -1.1956287 | 0.1956758  | -3.3860695 |
| H | -1.1267112 | 2.1398611  | -2.4520119 |
| H | -1.5406693 | 0.8383933  | -1.3324750 |
| C | 1.1988439  | 0.4373396  | -4.1570679 |
| H | 1.3654255  | 2.3814584  | -3.2147697 |
| H | 2.5442484  | 1.2034395  | -2.6302237 |
| C | -0.2762802 | 0.5322745  | -4.5668621 |
| H | -2.2474914 | 0.2974914  | -3.6763501 |
| H | -1.0452488 | -0.8534323 | -3.0951611 |
| H | 1.8494554  | 0.7190551  | -4.9929471 |
| H | 1.4372758  | -0.6054073 | -3.9049964 |

|   |            |            |            |
|---|------------|------------|------------|
| H | -0.4780888 | -0.1403500 | -5.4086464 |
| H | -0.4916219 | 1.5535712  | -4.9120939 |
| C | 0.5990893  | 3.2195809  | -0.5876775 |
| C | -0.5485182 | 3.6022238  | 0.3575447  |
| C | 1.8377847  | 4.0884242  | -0.3329807 |
| H | 0.2688311  | 3.4185449  | -1.6139130 |
| C | -0.8894032 | 5.0942849  | 0.2326731  |
| H | -0.2502160 | 3.3835499  | 1.3917081  |
| H | -1.4238815 | 2.9830940  | 0.1345980  |
| C | 1.4868754  | 5.5759352  | -0.4776582 |
| H | 2.2156858  | 3.9005602  | 0.6795310  |
| H | 2.6342230  | 3.8060087  | -1.0305551 |
| C | 0.3471192  | 5.9707020  | 0.4702042  |
| H | -1.6857281 | 5.3520141  | 0.9405282  |
| H | -1.2825103 | 5.2897763  | -0.7753557 |
| H | 2.3769716  | 6.1853876  | -0.2830616 |
| H | 1.1822370  | 5.7767698  | -1.5149218 |
| H | 0.0924043  | 7.0288234  | 0.3381774  |
| H | 0.6839170  | 5.8484478  | 1.5095479  |
| H | 1.2754586  | 1.9021098  | 1.7745237  |
| O | 3.2437529  | 1.5234684  | 0.8275661  |
| C | 4.2190638  | 0.9460016  | -0.0625878 |
| H | 5.1975299  | 1.1425798  | 0.3769185  |
| H | 4.0688661  | -0.1352913 | -0.1586535 |
| H | 4.1531320  | 1.4170622  | -1.0482352 |

**3ohH** [W(CO)<sub>5</sub>]PH<sub>2</sub>OMe

19

Energy = -1092.102438425

|   |            |            |            |
|---|------------|------------|------------|
| P | 1.3195398  | 1.0868747  | 0.9714481  |
| O | 0.7402730  | 1.5638667  | -0.4726191 |
| W | 1.3240921  | -1.3808868 | 1.2879301  |
| C | 3.2336379  | -1.2626949 | 2.0513941  |
| O | 4.3059377  | -1.1832587 | 2.4749237  |
| C | 0.5411588  | -1.1289051 | 3.1765981  |
| O | 0.0992464  | -0.9759625 | 4.2334033  |
| C | 1.3214992  | -3.4016054 | 1.5268771  |
| O | 1.3192080  | -4.5523111 | 1.6602474  |
| C | -0.5851874 | -1.4298298 | 0.5073428  |
| O | -1.6534688 | -1.4533004 | 0.0692126  |
| C | 2.1012704  | -1.5674573 | -0.6139921 |
| O | 2.5360087  | -1.6684910 | -1.6791291 |
| C | 0.6992574  | 2.9899605  | -0.7484502 |
| H | 0.2879970  | 3.0931790  | -1.7525429 |
| H | 0.5930400  | 1.8843395  | 1.8890804  |
| H | 2.5493005  | 1.7824192  | 1.0703191  |
| H | 0.0541550  | 3.4931418  | -0.0207785 |
| H | 1.7104205  | 3.4080083  | -0.7079713 |

**4a** [W(CO)<sub>5</sub>]PH(NHMe)NPh<sub>2</sub>

42

Energy = -1590.021118953

|   |            |            |            |
|---|------------|------------|------------|
| P | 2.6089781  | 1.0030405  | 0.1588273  |
| N | 1.2558158  | 1.9941564  | -0.2445122 |
| C | 1.3747736  | 3.0492315  | -1.2084786 |
| C | 1.0052778  | 4.3526226  | -0.8548417 |
| C | 1.8605712  | 2.7898914  | -2.4947565 |
| C | 1.1290488  | 5.3868441  | -1.7795802 |
| H | 0.6223348  | 4.5443183  | 0.1430687  |
| C | 2.0022475  | 3.8343690  | -3.4102582 |
| H | 2.1115686  | 1.7732647  | -2.7821292 |
| C | 1.6354997  | 5.1338307  | -3.0579351 |
| H | 0.8409358  | 6.3953642  | -1.4974613 |
| H | 2.3829667  | 3.6254774  | -4.4056177 |
| H | 1.7381518  | 5.9433501  | -3.7746369 |
| C | -0.0002602 | 1.7760757  | 0.3806789  |
| C | -0.0681993 | 1.3102172  | 1.7013917  |
| C | -1.1891526 | 1.9767159  | -0.3370607 |
| C | -1.3016512 | 1.0060401  | 2.2776034  |
| H | 0.8400800  | 1.2003349  | 2.2837667  |
| C | -2.4164037 | 1.6914685  | 0.2535187  |
| H | -1.1421760 | 2.3402982  | -1.3586819 |
| C | -2.4813693 | 1.1925042  | 1.5582373  |
| H | -1.3342613 | 0.6361589  | 3.2986333  |
| H | -3.3291922 | 1.8426979  | -0.3159701 |
| H | -3.4419970 | 0.9597083  | 2.0078590  |
| W | 2.2767650  | -1.4908270 | 0.1709426  |
| C | 0.2251937  | -1.4361691 | -0.0932063 |
| O | -0.9159032 | -1.4968997 | -0.2541928 |
| C | 2.5129897  | -1.3925990 | -1.8715382 |
| O | 2.6356920  | -1.3069831 | -3.0185798 |
| C | 2.1664266  | -3.5135688 | 0.1254864  |
| O | 2.1226643  | -4.6728525 | 0.1019565  |
| C | 4.3112485  | -1.6290511 | 0.4338597  |
| O | 5.4539834  | -1.7284776 | 0.5822543  |
| C | 1.9803776  | -1.4611058 | 2.2051642  |
| O | 1.8003650  | -1.4209774 | 3.3481208  |
| H | 3.4344257  | 1.5372131  | -0.8456356 |
| C | 3.7563119  | 3.0003278  | 1.6678318  |
| H | 2.8821316  | 3.5989761  | 1.9533110  |
| H | 4.5264059  | 3.1024726  | 2.4358971  |
| H | 4.1494718  | 3.3861865  | 0.7231913  |
| N | 3.4296654  | 1.5782790  | 1.4995477  |
| H | 3.2538209  | 1.0782362  | 2.3649141  |

**4b** [W(CO)<sub>5</sub>]PH(NHMe)NCy<sub>2</sub>

54

Energy = -1597.270022588

|   |           |            |            |
|---|-----------|------------|------------|
| P | 1.7586380 | 1.1476892  | 0.6696083  |
| N | 0.8315714 | 1.8317282  | -0.5532860 |
| W | 1.3800755 | -1.3227092 | 1.2034239  |
| C | 3.2779466 | -1.3738198 | 2.0049359  |

O 4.3322475 -1.4217493 2.4758800  
 C 0.6621968 -0.6337668 3.0050746  
 O 0.2577140 -0.2346877 4.0122035  
 C 1.1040285 -3.2373727 1.7876259  
 O 0.9493869 -4.3361469 2.1315782  
 C -0.5449563 -1.2962277 0.4787032  
 O -1.6405894 -1.3202588 0.1079698  
 C 2.0915304 -1.9665622 -0.6179968  
 O 2.4861252 -2.3445234 -1.6389720  
 C 0.5682577 1.0668858 -1.7905179  
 C -0.9005635 1.1493081 -2.2292014  
 C 1.5038666 1.4554397 -2.9458215  
 H 0.7746500 0.0211007 -1.5297978  
 C -1.1469867 0.2505488 -3.4495643  
 H -1.1509723 2.1849588 -2.4954984  
 H -1.5490535 0.8607423 -1.3967850  
 C 1.2509991 0.5758138 -4.1789071  
 H 1.3385928 2.5103628 -3.2064990  
 H 2.5452865 1.3635141 -2.6175295  
 C -0.2197351 0.6291415 -4.6115267  
 H -2.1966120 0.3230146 -3.7569118  
 H -0.9686044 -0.7968747 -3.1679364  
 H 1.9049700 0.8895546 -5.0008933  
 H 1.5183174 -0.4624087 -3.9371170  
 H -0.3873359 -0.0390137 -5.4644521  
 H -0.4615929 1.6473976 -4.9482482  
 C 0.4931797 3.2789368 -0.5704094  
 C -0.6717415 3.5933328 0.3796352  
 C 1.6840671 4.2094857 -0.2954006  
 H 0.1578184 3.4898116 -1.5929421  
 C -1.0909582 5.0662966 0.2703422  
 H -0.3607307 3.3747673 1.4107029  
 H -1.5126863 2.9308515 0.1498859  
 C 1.2600492 5.6794725 -0.4279868  
 H 2.0488285 4.0451808 0.7285352  
 H 2.5036255 3.9761003 -0.9847403  
 C 0.0968730 6.0051841 0.5179201  
 H -1.9008995 5.2767681 0.9782879  
 H -1.4919024 5.2501012 -0.7367950  
 H 2.1163769 6.3321336 -0.2228919  
 H 0.9515186 5.8723874 -1.4652742  
 H -0.2123177 7.0494731 0.3924059  
 H 0.4364293 5.8935674 1.5575774  
 H 1.3973218 2.0169518 1.7131014  
 C 4.3624568 0.8954070 -0.2242178  
 H 5.3678459 0.9554403 0.2012873  
 H 4.0938132 -0.1593710 -0.3226418  
 H 4.3740102 1.3438733 -1.2263355  
 N 3.4086692 1.5453784 0.6802823  
 H 3.6066039 2.5343847 0.8087745

**4nCl** [W(CO)<sub>5</sub>]PCl<sub>2</sub>NHMe

20

Energy = -1991.563233259

P 1.7047664 0.7277347 0.7740577  
 Cl 1.5426856 1.9608176 2.4308249  
 N 0.7205966 1.4937152 -0.3022528  
 W 1.3709109 -1.6965499 1.1035187  
 C 3.2650849 -1.8298660 1.9223034  
 O 4.3198226 -1.8999568 2.3812349  
 C 0.5861258 -1.3680880 2.9870683  
 O 0.1459335 -1.1810355 4.0354641  
 C 1.1008040 -3.7048421 1.3214207  
 O 0.9461201 -4.8442440 1.4382065  
 C -0.5240923 -1.5318821 0.3148683  
 O -1.5887448 -1.4352550 -0.1220307  
 C 2.1580029 -1.9909484 -0.7802682  
 O 2.5987958 -2.1505499 -1.8346999  
 Cl 3.6609320 1.2647506 0.2287542  
 C 0.8223311 2.9007947 -0.7202043  
 H -0.1328976 3.2000898 -1.1545806  
 H 0.3242590 0.8641037 -0.9948468  
 H 1.0216080 3.5173078 0.1576014  
 H 1.6229462 3.0431525 -1.4533091

**4nhH** [W(CO)<sub>5</sub>]PH<sub>2</sub>NHMe

20

Energy = -1072.221748023

P 1.3622839 1.0807990 0.9682085  
 N 0.5288492 1.6475027 -0.3806939  
 W 1.3383278 -1.4114989 1.2874200  
 C 3.2119308 -1.2887670 2.1347029  
 O 4.2633070 -1.2127393 2.6089113  
 C 0.4795413 -1.1454548 3.1425309  
 O -0.0033288 -0.9836027 4.1796496  
 C 1.3260084 -3.4257623 1.5319129  
 O 1.3196198 -4.5771772 1.6694308  
 C -0.5405807 -1.4743802 0.4414322  
 O -1.5946797 -1.5133182 -0.0307463  
 C 2.1968629 -1.6101181 -0.5727213  
 O 2.6790214 -1.7183640 -1.6187801  
 C 0.6141246 3.0635356 -0.7703625  
 H -0.0958778 3.2500366 -1.5795512  
 H 0.8103719 1.8908603 1.9818295  
 H 2.6462104 1.6891155 0.9444338  
 H 0.5497442 1.0020423 -1.1640137  
 H 0.3346514 3.6829242 0.0867383  
 H 1.6207426 3.3534955 -1.1010517

**4n** [W(CO)<sub>5</sub>]PH(NHMe)<sub>2</sub>

25

Energy = -1166.966703847

|   |            |            |            |
|---|------------|------------|------------|
| P | 1.6952235  | 1.1802893  | 0.8201246  |
| N | 0.7348127  | 1.6934506  | -0.4616806 |
| W | 1.3561546  | -1.2712158 | 1.3305550  |
| C | 3.2252299  | -1.3259094 | 2.1925429  |
| O | 4.2730834  | -1.3575562 | 2.6805151  |
| C | 0.5525679  | -0.7369763 | 3.1516830  |
| O | 0.1056919  | -0.4218390 | 4.1701637  |
| C | 1.0845118  | -3.2398426 | 1.7307574  |
| O | 0.9298574  | -4.3683382 | 1.9551778  |
| C | -0.5189701 | -1.1598876 | 0.4862851  |
| O | -1.5738067 | -1.0999394 | 0.0164526  |
| C | 2.1748489  | -1.7147050 | -0.5030905 |
| O | 2.6382154  | -1.9546436 | -1.5367966 |
| C | 0.6269281  | 3.0908526  | -0.8993448 |
| H | -0.3239006 | 3.2355851  | -1.4199726 |
| H | 1.2923554  | 2.1615066  | 1.7473011  |
| C | 3.8145777  | 2.9773721  | 0.6517170  |
| H | 3.8454782  | 3.3368098  | -0.3842550 |
| H | 3.1565710  | 3.6334210  | 1.2293171  |
| H | 4.8200454  | 3.0387657  | 1.0776749  |
| N | 3.3209351  | 1.5998986  | 0.7635157  |
| H | 3.9327613  | 0.8995939  | 0.3573148  |
| H | 0.6366662  | 3.7366362  | -0.0161938 |
| H | 1.4451971  | 3.3942218  | -1.5640122 |
| H | 0.6189973  | 1.0133027  | -1.2063107 |

**5a2** {[W(CO)<sub>5</sub>]PNPh<sub>2</sub>]<sub>2</sub> (one P=P)

70

Energy = -2988.165322093

|   |            |            |            |
|---|------------|------------|------------|
| P | -0.3801503 | -0.8832381 | 0.1625470  |
| N | -2.0485619 | -0.5546467 | -0.0663670 |
| C | -2.9440648 | -1.0810681 | 0.9126025  |
| C | -4.1356632 | -1.7180916 | 0.5407840  |
| C | -2.5908062 | -1.0006256 | 2.2650965  |
| C | -4.9580157 | -2.2645132 | 1.5214842  |
| H | -4.4036302 | -1.7951444 | -0.5072268 |
| C | -3.4102866 | -1.5686564 | 3.2383364  |
| H | -1.6794964 | -0.4786612 | 2.5451816  |
| C | -4.5996584 | -2.1983935 | 2.8718603  |
| H | -5.8779544 | -2.7608991 | 1.2265827  |
| H | -3.1233819 | -1.5042899 | 4.2835115  |
| H | -5.2443567 | -2.6330585 | 3.6295736  |
| C | -2.5308850 | -0.0522001 | -1.3132878 |
| C | -1.8390630 | -0.3344003 | -2.4982643 |
| C | -3.6973178 | 0.7227936  | -1.3594444 |
| C | -2.3015793 | 0.1656717  | -3.7134276 |
| H | -0.9447538 | -0.9504112 | -2.4662605 |
| C | -4.1633640 | 1.1994559  | -2.5821992 |
| H | -4.2342235 | 0.9428757  | -0.4435474 |
| C | -3.4683071 | 0.9298419  | -3.7632907 |
| H | -1.7549308 | -0.0591539 | -4.6246260 |

|   |            |            |            |
|---|------------|------------|------------|
| H | -5.0679783 | 1.7999612  | -2.6071397 |
| H | -3.8314884 | 1.3130142  | -4.7117631 |
| W | 0.5105438  | -3.1781227 | 0.2301911  |
| C | 1.1083515  | -3.0801250 | -1.7513477 |
| O | 1.3951293  | -3.1124839 | -2.8664747 |
| C | 2.3487215  | -2.5336471 | 0.9117906  |
| O | 3.3825800  | -2.2252480 | 1.3211571  |
| C | 1.1791267  | -5.0943277 | 0.2665666  |
| O | 1.5569160  | -6.1885249 | 0.2828944  |
| C | -0.1143642 | -3.4060261 | 2.1882368  |
| O | -0.4432450 | -3.5708273 | 3.2807738  |
| C | -1.3222501 | -3.8458772 | -0.4382484 |
| O | -2.3348629 | -4.2336232 | -0.8308366 |
| P | 0.4543059  | 0.9800469  | 0.1841970  |
| N | 2.0972879  | 0.6743742  | -0.2031672 |
| C | 2.4733555  | 0.2321257  | -1.5083596 |
| C | 1.6895741  | 0.5735892  | -2.6180156 |
| C | 3.6287286  | -0.5400746 | -1.6865602 |
| C | 2.0509934  | 0.1350766  | -3.8899164 |
| H | 0.8035806  | 1.1875475  | -2.4832125 |
| C | 3.9932207  | -0.9548257 | -2.9651591 |
| H | 4.2363923  | -0.8057851 | -0.8287803 |
| C | 3.2068852  | -0.6256603 | -4.0715096 |
| H | 1.4342837  | 0.4058735  | -4.7419600 |
| H | 4.8903794  | -1.5534417 | -3.0928419 |
| H | 3.4911965  | -0.9606356 | -5.0641239 |
| C | 3.0731169  | 1.1596547  | 0.7184128  |
| C | 2.8362639  | 1.0192865  | 2.0913081  |
| C | 4.2291467  | 1.8162583  | 0.2748062  |
| C | 3.7354221  | 1.5480458  | 3.0152150  |
| H | 1.9523804  | 0.4818039  | 2.4249902  |
| C | 5.1318095  | 2.3228127  | 1.2048758  |
| H | 4.4070299  | 1.9398417  | -0.7878329 |
| C | 4.8892994  | 2.1974185  | 2.5767111  |
| H | 3.5383783  | 1.4374821  | 4.0771811  |
| H | 6.0232193  | 2.8351141  | 0.8547604  |
| H | 5.5960402  | 2.6013976  | 3.2950540  |
| W | -0.4333631 | 3.2621392  | 0.4516988  |
| C | -2.2163163 | 2.5766086  | 1.2327288  |
| O | -3.2188861 | 2.2496147  | 1.7011616  |
| C | 0.3354947  | 3.3834890  | 2.3675688  |
| O | 0.7446399  | 3.4873583  | 3.4403397  |
| C | -1.1029666 | 5.1683824  | 0.6421244  |
| O | -1.4819716 | 6.2573837  | 0.7453639  |
| C | 1.3403144  | 3.9845947  | -0.3124748 |
| O | 2.3166097  | 4.4083572  | -0.7563776 |
| C | -1.1776424 | 3.2648972  | -1.4821940 |
| O | -1.5478180 | 3.3513259  | -2.5695087 |

**5aBe** [W(CO)<sub>5</sub>]PNPh<sub>2</sub>CH<sub>2</sub>CMe<sub>2</sub> (PC<sub>2</sub> ring)

47

Energy = -1651.413337049

|   |            |            |            |
|---|------------|------------|------------|
| P | -0.3626546 | -0.1376185 | 1.1778756  |
| N | -1.9491195 | -0.0337358 | 0.5165139  |
| C | -2.9551841 | -1.0051849 | 0.7994239  |
| C | -2.6426001 | -2.3677999 | 0.8557603  |
| C | -4.2680954 | -0.5854899 | 1.0532935  |
| C | -3.6322261 | -3.2996989 | 1.1686097  |
| H | -1.6272608 | -2.6959182 | 0.6570492  |
| C | -5.2553821 | -1.5234285 | 1.3463076  |
| H | -4.5078056 | 0.4727530  | 1.0137993  |
| C | -4.9427402 | -2.8842739 | 1.4095964  |
| H | -3.3769145 | -4.3545950 | 1.2111045  |
| H | -6.2698775 | -1.1868342 | 1.5401191  |
| H | -5.7129978 | -3.6122507 | 1.6457535  |
| C | -2.1762844 | 0.9722874  | -0.4612123 |
| C | -1.4650675 | 2.1802207  | -0.3995212 |
| C | -3.0578303 | 0.7503747  | -1.5305117 |
| C | -1.6206420 | 3.1402232  | -1.3984586 |
| H | -0.7940406 | 2.3699628  | 0.4326832  |
| C | -3.2205729 | 1.7238129  | -2.5113717 |
| H | -3.6015883 | -0.1861560 | -1.5942256 |
| C | -2.4998736 | 2.9207979  | -2.4582862 |
| H | -1.0555345 | 4.0657787  | -1.3379555 |
| H | -3.9032587 | 1.5359012  | -3.3353049 |
| H | -2.6232504 | 3.6704366  | -3.2338819 |
| W | 1.6167775  | -0.4998093 | -0.3446386 |
| C | 0.9353661  | -2.4092076 | -0.6978425 |
| O | 0.5490579  | -3.4800964 | -0.9014883 |
| C | 0.6029489  | 0.1383785  | -2.0337428 |
| O | 0.1128343  | 0.4573395  | -3.0279307 |
| C | 3.2270694  | -0.8144011 | -1.5224359 |
| O | 4.1569470  | -0.9982332 | -2.1923562 |
| C | 2.2088963  | 1.4433113  | 0.0086220  |
| O | 2.5236713  | 2.5399528  | 0.1929482  |
| C | 2.6952937  | -1.1991212 | 1.2570444  |
| O | 3.3150040  | -1.6144682 | 2.1420123  |
| C | -0.6005882 | -0.7786899 | 2.8640066  |
| H | 0.2080010  | -1.3948428 | 3.2494890  |
| H | -1.5942224 | -1.1407154 | 3.1155632  |
| C | -0.3895985 | 0.7318557  | 2.8256498  |
| C | -1.5910899 | 1.5931037  | 3.1627677  |
| H | -1.7382810 | 1.6010209  | 4.2503115  |
| H | -1.4370082 | 2.6252677  | 2.8327294  |
| H | -2.5041794 | 1.2115537  | 2.6992594  |
| C | 0.9372794  | 1.2599561  | 3.3365147  |
| H | 0.9375800  | 1.2576534  | 4.4339907  |
| H | 1.7785435  | 0.6473170  | 3.0012586  |
| H | 1.1028918  | 2.2864207  | 2.9949240  |

**5a.CILic** adduct of **6a** and **CILic**

65

Energy = -2577.674629487

|    |            |            |            |
|----|------------|------------|------------|
| P  | 0.2311415  | 0.1319137  | 0.1081486  |
| Cl | -0.3666142 | 0.3976488  | -2.1596877 |
| N  | 0.2998095  | 1.7629464  | 0.6207679  |
| C  | 1.4058862  | 2.6578864  | 0.4208378  |
| C  | 1.9285084  | 2.8780891  | -0.8545756 |
| C  | 1.9281954  | 3.3483960  | 1.5201780  |
| C  | 2.9796638  | 3.7790631  | -1.0258289 |
| H  | 1.4999928  | 2.3545084  | -1.7010068 |
| C  | 2.9825379  | 4.2411372  | 1.3435541  |
| H  | 1.5084357  | 3.1735794  | 2.5057701  |
| C  | 3.5123934  | 4.4610526  | 0.0685619  |
| H  | 3.3781371  | 3.9526855  | -2.0209732 |
| H  | 3.3936220  | 4.7639363  | 2.2027903  |
| H  | 4.3328438  | 5.1598100  | -0.0685593 |
| C  | -0.9170615 | 2.3817727  | 1.0601214  |
| C  | -1.7924844 | 1.6879205  | 1.9059490  |
| C  | -1.2445292 | 3.6802203  | 0.6471263  |
| C  | -2.9875535 | 2.2778991  | 2.3129658  |
| H  | -1.5245886 | 0.6901406  | 2.2387105  |
| C  | -2.4376797 | 4.2677337  | 1.0664394  |
| H  | -0.5658623 | 4.2217277  | -0.0038246 |
| C  | -3.3180086 | 3.5705774  | 1.8966354  |
| H  | -3.6548427 | 1.7298958  | 2.9726535  |
| H  | -2.6817661 | 5.2735086  | 0.7349232  |
| H  | -4.2460566 | 4.0312958  | 2.2226368  |
| W  | 2.5228481  | -1.0407076 | 0.2145818  |
| C  | 3.7337770  | 0.2343950  | -0.8533525 |
| O  | 4.5171088  | 0.8624032  | -1.4330830 |
| C  | 2.8621892  | 0.0287111  | 1.9389545  |
| O  | 3.0328492  | 0.6085400  | 2.9268046  |
| C  | 4.1611347  | -2.1813815 | 0.4899958  |
| O  | 5.1103844  | -2.8398827 | 0.6504441  |
| C  | 1.4839412  | -2.4403365 | 1.3050664  |
| O  | 0.9372609  | -3.2564001 | 1.9197738  |
| C  | 1.9940064  | -2.0349621 | -1.5017429 |
| O  | 1.6729336  | -2.6141666 | -2.4531268 |
| Li | 0.9003517  | 0.6351862  | -4.1368043 |
| O  | 2.0189398  | 2.4029966  | -4.2772384 |
| O  | 0.2492137  | -0.7364597 | -5.5870921 |
| O  | -0.4907352 | 1.8451942  | -5.1678208 |
| C  | 3.4149951  | 2.0816951  | -4.4600200 |
| C  | 1.4724082  | 3.2619495  | -5.2965837 |
| C  | -0.8804166 | -0.1824782 | -6.2945301 |
| C  | 1.3545227  | -1.1021482 | -6.4368343 |
| C  | -0.0334922 | 3.2103536  | -5.1250838 |
| C  | -0.6882430 | 1.3097556  | -6.4889692 |
| H  | 3.9514640  | 2.9285751  | -4.9011495 |
| H  | 3.8064470  | 1.8860595  | -3.4611625 |
| H  | 1.8438299  | 4.2858793  | -5.1627213 |
| H  | 1.7734556  | 2.9074578  | -6.2913292 |

|   |            |            |            |
|---|------------|------------|------------|
| H | -1.7463131 | -0.3687728 | -5.6547809 |
| H | -1.0222290 | -0.6911177 | -7.2543665 |
| H | 1.1120939  | -2.0138664 | -6.9973592 |
| H | 1.5648022  | -0.2969982 | -7.1536124 |
| H | -0.3119756 | 3.5753101  | -4.1331851 |
| H | -0.5364854 | 3.8145954  | -5.8884005 |
| H | -1.5758037 | 1.7605506  | -6.9510620 |
| H | 0.1829096  | 1.5199023  | -7.1242321 |
| O | 2.7533940  | -0.1746581 | -4.6863532 |
| C | 2.5314783  | -1.3397821 | -5.5106799 |
| H | 3.4352037  | -1.5857718 | -6.0790484 |
| H | 2.3081930  | -2.1499918 | -4.8150286 |
| C | 3.5471010  | 0.8445269  | -5.3248150 |
| H | 3.1794224  | 1.0303792  | -6.3429050 |
| H | 4.5941458  | 0.5214409  | -5.3843930 |

**5a.nH** [W(CO)<sub>5</sub>]PNPh<sub>2</sub>.NH<sub>2</sub>Me (P..N adduct)  
42

Energy = -1589.992184618

|   |            |            |            |
|---|------------|------------|------------|
| P | -0.0281470 | 1.2492114  | -1.2004682 |
| N | -1.3483722 | 1.3566462  | -0.1016103 |
| W | 1.4214104  | -0.8660742 | -0.9219436 |
| C | -1.4389251 | 0.7165634  | 1.1748520  |
| C | -2.4450872 | 2.2172197  | -0.4536591 |
| C | 2.5655582  | -0.1313366 | -2.4560590 |
| C | 2.5505429  | 0.0882368  | 0.4911867  |
| C | 2.6029391  | -2.5038476 | -0.9712496 |
| C | 0.3450761  | -1.8494843 | 0.5475714  |
| C | 0.0901475  | -1.6374379 | -2.2912334 |
| C | -2.5991163 | -0.0015508 | 1.4944163  |
| C | -0.4038355 | 0.7932088  | 2.1113846  |
| C | -3.0103657 | 3.0575316  | 0.5156749  |
| C | -2.9493573 | 2.2369730  | -1.7598445 |
| O | 3.2293418  | 0.2236142  | -3.3389131 |
| O | 3.1401492  | 0.6901810  | 1.2923831  |
| O | 3.2975056  | -3.4369526 | -0.9997697 |
| O | -0.1911156 | -2.5189550 | 1.3212882  |
| O | -0.6827151 | -2.0441056 | -3.0507322 |
| C | -2.7138852 | -0.6349207 | 2.7283582  |
| H | -3.4029728 | -0.0600903 | 0.7667302  |
| C | -0.5185256 | 0.1513266  | 3.3443840  |
| H | 0.4935943  | 1.3576667  | 1.8878423  |
| C | -4.0615653 | 3.9089953  | 0.1773417  |
| H | -2.6266704 | 3.0365742  | 1.5312163  |
| C | -3.9935322 | 3.0986229  | -2.0932025 |
| H | -2.5188650 | 1.5754559  | -2.5047973 |
| C | -1.6731544 | -0.5643600 | 3.6590863  |
| H | -3.6140536 | -1.1975787 | 2.9591794  |
| H | 0.2970806  | 0.2171972  | 4.0587148  |
| C | -4.5559680 | 3.9385518  | -1.1285564 |
| H | -4.4889434 | 4.5565739  | 0.9380168  |

|   |            |            |            |
|---|------------|------------|------------|
| H | -4.3786625 | 3.1002734  | -3.1091398 |
| H | -1.7619556 | -1.0653014 | 4.6183700  |
| H | -5.3739763 | 4.6032424  | -1.3901863 |
| H | 1.3643369  | 2.5663396  | 0.4848244  |
| N | 1.0247595  | 2.7550338  | -0.4608924 |
| C | 2.1652508  | 3.1380225  | -1.3411805 |
| H | 2.6027101  | 4.0756254  | -0.9960673 |
| H | 2.9088790  | 2.3431334  | -1.3065156 |
| H | 1.7867990  | 3.2452948  | -2.3586481 |
| H | 0.3655896  | 3.5338982  | -0.3872465 |

**5a** [W(CO)<sub>5</sub>]PNPh<sub>2</sub> (partial P=N double-bond)

35

Energy = -1494.041307738

|   |            |            |            |
|---|------------|------------|------------|
| P | 1.1322091  | -1.4111780 | 0.5842248  |
| N | 2.5284380  | -0.6592902 | 1.1704567  |
| C | 2.4099066  | 0.5655913  | 1.9189073  |
| C | 1.3764927  | 0.7211868  | 2.8486403  |
| C | 3.3330985  | 1.5970599  | 1.7090698  |
| C | 1.2531128  | 1.9198960  | 3.5491697  |
| H | 0.6933362  | -0.1027666 | 3.0294228  |
| C | 3.2042258  | 2.7891900  | 2.4171572  |
| H | 4.1339755  | 1.4655244  | 0.9889556  |
| C | 2.1642076  | 2.9566222  | 3.3357520  |
| H | 0.4553204  | 2.0335284  | 4.2769511  |
| H | 3.9164847  | 3.5906789  | 2.2450568  |
| H | 2.0714154  | 3.8856929  | 3.8902242  |
| C | 3.8787312  | -1.1258211 | 0.9789651  |
| C | 4.3650692  | -1.3234123 | -0.3140175 |
| C | 4.6940380  | -1.3546035 | 2.0903220  |
| C | 5.6653007  | -1.7904472 | -0.4970783 |
| H | 3.7301334  | -1.0892184 | -1.1610964 |
| C | 5.9919178  | -1.8225670 | 1.8995691  |
| H | 4.3049478  | -1.1854018 | 3.0893984  |
| C | 6.4776958  | -2.0476954 | 0.6089084  |
| H | 6.0434086  | -1.9448073 | -1.5032469 |
| H | 6.6216483  | -2.0214563 | 2.7614801  |
| H | 7.4889365  | -2.4166824 | 0.4666097  |
| W | 1.3395847  | -3.7443370 | -0.1966545 |
| C | 2.3953765  | -3.3385511 | -1.9322736 |
| O | 2.9903105  | -3.1365110 | -2.8997281 |
| C | 3.1271281  | -4.1795695 | 0.7496399  |
| O | 4.1037256  | -4.5103595 | 1.2666610  |
| C | 1.1663679  | -5.7070330 | -0.7570797 |
| O | 1.0667797  | -6.8182560 | -1.0641206 |
| C | 0.3270411  | -4.2187299 | 1.5450080  |
| O | -0.2391382 | -4.5018542 | 2.5103143  |
| C | -0.4453771 | -3.3736396 | -1.1516083 |
| O | -1.4511937 | -3.1918142 | -1.6914094 |



**5b** [W(CO)<sub>5</sub>]PNCy<sub>2</sub> (partial P=N double-bond)

47

Energy = -1501.301826426

|   |            |            |            |
|---|------------|------------|------------|
| P | 2.2676779  | 0.3009610  | -0.5539300 |
| N | 1.7091981  | 1.8133860  | -0.1749758 |
| W | 1.3385233  | -1.6239470 | 0.7370827  |
| C | 1.5144568  | -0.6952859 | 2.5718199  |
| O | 1.6227165  | -0.1874460 | 3.6044567  |
| C | -0.6147367 | -0.9805894 | 0.5659029  |
| O | -1.7111335 | -0.6295494 | 0.4629626  |
| C | 0.7222588  | -3.3530799 | 1.6388913  |
| O | 0.3665914  | -4.3276715 | 2.1542006  |
| C | 1.1997173  | -2.5526309 | -1.1003512 |
| O | 1.1307579  | -3.0829616 | -2.1245975 |
| C | 3.2967436  | -2.2590358 | 0.8755809  |
| O | 4.3905293  | -2.6244888 | 0.9488765  |
| C | 0.7108417  | 2.1489246  | 0.8703575  |
| C | 1.3168765  | 3.0257399  | 1.9766003  |
| C | -0.5554607 | 2.7799986  | 0.2724151  |
| H | 0.4341971  | 1.1888270  | 1.3122623  |
| C | 0.2733998  | 3.2837356  | 3.0734051  |
| H | 1.6455821  | 3.9853051  | 1.5576173  |
| H | 2.2000955  | 2.5270519  | 2.3899704  |
| C | -1.5863461 | 3.0377558  | 1.3811184  |
| H | -0.3073325 | 3.7303461  | -0.2171849 |
| H | -0.9664594 | 2.1127619  | -0.4926314 |
| C | -0.9993479 | 3.9142601  | 2.4945777  |
| H | 0.7081499  | 3.9301053  | 3.8440064  |
| H | 0.0188238  | 2.3325681  | 3.5600763  |
| H | -2.4758683 | 3.5087841  | 0.9481759  |
| H | -1.9076314 | 2.0769892  | 1.8056387  |
| H | -1.7407959 | 4.0626561  | 3.2879811  |
| H | -0.7604305 | 4.9068872  | 2.0873879  |
| C | 2.2425870  | 2.9895303  | -0.9411715 |
| C | 3.7551808  | 3.1507017  | -0.7446427 |
| C | 1.8806918  | 2.8998192  | -2.4290696 |
| H | 1.7459255  | 3.8687594  | -0.5185864 |
| C | 4.2665978  | 4.3837354  | -1.5008956 |
| H | 4.2483221  | 2.2452137  | -1.1217026 |
| H | 3.9794739  | 3.2269223  | 0.3251978  |
| C | 2.3958158  | 4.1326500  | -3.1830435 |
| H | 2.3375425  | 1.9887386  | -2.8373585 |
| H | 0.7947990  | 2.8008818  | -2.5372264 |
| C | 3.9074840  | 4.3112340  | -2.9907949 |
| H | 5.3513402  | 4.4693046  | -1.3701715 |
| H | 3.8206414  | 5.2884254  | -1.0634226 |
| H | 2.1515565  | 4.0393534  | -4.2473233 |
| H | 1.8743649  | 5.0273979  | -2.8138945 |
| H | 4.2495785  | 5.2161111  | -3.5063466 |
| H | 4.4328853  | 3.4613908  | -3.4482920 |

**6a** [W(CO)<sub>5</sub>]PNPh<sub>2</sub>C<sub>2</sub>Ph<sub>2</sub>: **6a** + PhCCPh

59

Energy = -2033.902245424

|   |            |            |            |
|---|------------|------------|------------|
| P | -0.2666964 | 0.6391877  | 0.2419101  |
| N | -1.3623636 | -0.1463474 | 1.3355185  |
| C | -0.8643294 | -0.9099932 | 2.4099009  |
| C | -1.6068328 | -1.9597580 | 2.9746396  |
| C | 0.4028887  | -0.6133265 | 2.9408624  |
| C | -1.0738724 | -2.7044262 | 4.0248254  |
| H | -2.5928879 | -2.1931876 | 2.5878764  |
| C | 0.9320302  | -1.3753576 | 3.9786125  |
| H | 0.9664585  | 0.2283308  | 2.5498277  |
| C | 0.2006745  | -2.4308428 | 4.5266389  |
| H | -1.6623444 | -3.5142140 | 4.4475707  |
| H | 1.9177922  | -1.1328172 | 4.3655113  |
| H | 0.6122960  | -3.0228112 | 5.3382657  |
| C | -2.6761405 | -0.3943178 | 0.8024984  |
| C | -2.9045778 | -1.4930028 | -0.0335024 |
| C | -3.7016424 | 0.5156416  | 1.0661066  |
| C | -4.1600775 | -1.6729390 | -0.6131139 |
| H | -2.0988886 | -2.1947773 | -0.2265857 |
| C | -4.9549984 | 0.3337337  | 0.4806330  |
| H | -3.5027897 | 1.3645146  | 1.7125390  |
| C | -5.1842314 | -0.7568040 | -0.3602958 |
| H | -4.3355187 | -2.5221205 | -1.2667640 |
| H | -5.7492808 | 1.0480875  | 0.6756866  |
| H | -6.1589701 | -0.8932294 | -0.8191706 |
| W | 1.4900202  | -0.7191681 | -0.9478635 |
| C | 2.8794916  | -0.2356929 | 0.4909038  |
| O | 3.6583669  | 0.0342621  | 1.3026990  |
| C | 1.0279913  | -2.4384792 | 0.0981174  |
| O | 0.7819782  | -3.4216882 | 0.6510354  |
| C | 2.8955316  | -1.7281146 | -1.9922097 |
| O | 3.7044845  | -2.2997480 | -2.5975507 |
| C | 0.0681180  | -1.2059277 | -2.3579919 |
| O | -0.7255958 | -1.4854069 | -3.1508178 |
| C | 1.9194551  | 1.0123861  | -1.9752862 |
| O | 2.1496944  | 1.9913734  | -2.5447178 |
| C | -0.2480566 | 2.3989344  | 0.5493128  |
| C | -1.1156541 | 2.0545450  | -0.4145844 |
| C | -2.0291895 | 2.4891425  | -1.4429868 |
| C | -2.7491884 | 1.5292216  | -2.1759451 |
| C | -2.1999056 | 3.8534580  | -1.7466081 |
| C | -3.6253111 | 1.9222843  | -3.1814272 |
| H | -2.6223724 | 0.4786452  | -1.9365462 |
| C | -3.0736390 | 4.2410018  | -2.7571692 |
| H | -1.6354020 | 4.6021928  | -1.2010687 |
| C | -3.7912823 | 3.2783590  | -3.4743461 |
| H | -4.1814697 | 1.1726628  | -3.7364466 |
| H | -3.1962278 | 5.2950404  | -2.9884134 |

|   |            |           |            |
|---|------------|-----------|------------|
| H | -4.4758723 | 3.5857064 | -4.2595018 |
| C | 0.3488774  | 3.4558965 | 1.3276582  |
| C | 1.5393994  | 3.2067764 | 2.0343225  |
| C | -0.2377631 | 4.7334880 | 1.4071063  |
| C | 2.1395993  | 4.2121712 | 2.7851892  |
| H | 1.9938405  | 2.2226407 | 1.9750140  |
| C | 0.3588718  | 5.7324348 | 2.1698160  |
| H | -1.1695859 | 4.9298772 | 0.8871957  |
| C | 1.5502721  | 5.4772921 | 2.8557574  |
| H | 3.0637624  | 4.0111496 | 3.3186266  |
| H | -0.1048675 | 6.7125209 | 2.2313440  |
| H | 2.0149429  | 6.2609629 | 3.4466950  |

**7a** electrophilic adduct of **5a** and C<sub>2</sub>H<sub>4</sub>

41

Energy = -1572.729649920

|   |            |            |            |
|---|------------|------------|------------|
| P | 0.5324823  | 1.1093108  | 0.7060124  |
| N | -0.1951063 | 0.4437463  | 2.1143278  |
| C | 0.6164331  | -0.1764120 | 3.1152479  |
| C | 0.3943715  | 0.1175794  | 4.4659827  |
| C | 1.6486724  | -1.0478254 | 2.7534906  |
| C | 1.1976136  | -0.4659258 | 5.4439696  |
| H | -0.4056181 | 0.7987717  | 4.7395618  |
| C | 2.4630537  | -1.6114179 | 3.7357311  |
| H | 1.8087231  | -1.2840583 | 1.7055621  |
| C | 2.2377346  | -1.3274283 | 5.0837190  |
| H | 1.0193050  | -0.2341735 | 6.4901308  |
| H | 3.2645983  | -2.2844650 | 3.4454593  |
| H | 2.8670426  | -1.7731403 | 5.8481674  |
| C | -1.6084099 | 0.3076518  | 2.1464311  |
| C | -2.2155661 | -0.7452404 | 2.8486576  |
| C | -2.4127830 | 1.2035126  | 1.4264075  |
| C | -3.6000454 | -0.8875418 | 2.8295366  |
| H | -1.6017959 | -1.4536809 | 3.3943244  |
| C | -3.7969640 | 1.0384922  | 1.3972951  |
| H | -1.9578042 | 2.0351718  | 0.8972001  |
| C | -4.4010662 | -0.0032451 | 2.1010523  |
| H | -4.0541694 | -1.7095974 | 3.3758553  |
| H | -4.4014449 | 1.7379888  | 0.8271448  |
| H | -5.4796178 | -0.1266636 | 2.0826137  |
| W | 0.2911481  | 0.0063449  | -1.5331792 |
| C | 2.0974929  | -0.9217300 | -1.1978641 |
| O | 3.1133431  | -1.4399489 | -1.0064785 |
| C | -0.6940858 | -1.5688696 | -0.6310293 |
| O | -1.2343862 | -2.4528435 | -0.1233382 |
| C | 0.1479335  | -0.9013880 | -3.3363150 |
| O | 0.0728073  | -1.4213513 | -4.3705974 |
| C | -1.5134802 | 0.9512379  | -1.8666926 |
| O | -2.5181675 | 1.4779957  | -2.0837784 |
| C | 1.2724479  | 1.6107563  | -2.3658021 |
| O | 1.8234872  | 2.5210795  | -2.8190290 |

|   |           |           |           |
|---|-----------|-----------|-----------|
| C | 0.7642026 | 2.8969264 | 1.0410775 |
| C | 1.9717863 | 2.0185372 | 1.3410651 |
| H | 2.8215703 | 2.0828871 | 0.6680607 |
| H | 2.2351597 | 1.8582152 | 2.3821511 |
| H | 0.8141434 | 3.5544892 | 0.1773551 |
| H | 0.2215976 | 3.2997743 | 1.8906231 |

C<sub>2</sub>H<sub>4</sub> : ethylene

6

Energy = -78.63740833140

|   |            |            |            |
|---|------------|------------|------------|
| C | -1.8253213 | 0.1356016  | 0.0000007  |
| C | -0.4928300 | 0.1355848  | 0.0000086  |
| H | -2.3971511 | 1.0606878  | -0.0000141 |
| H | -2.3971716 | -0.7894743 | -0.0000104 |
| H | 0.0789993  | -0.7895021 | -0.0000353 |
| H | 0.0790194  | 1.0606615  | 0.0000354  |

**CILic** CILi(12-crown-4)

30

Energy = -1083.609609229

|    |            |            |            |
|----|------------|------------|------------|
| Cl | 0.0045386  | -0.0004779 | 3.1100263  |
| Li | 0.0045994  | -0.0010435 | 0.8821557  |
| O  | -1.3023837 | -1.4258092 | -0.0541579 |
| O  | 1.3121384  | 1.4251092  | -0.0545691 |
| O  | 1.4272779  | -1.3058340 | -0.0572052 |
| C  | -2.4899163 | -0.7488024 | -0.5109293 |
| C  | -0.6046555 | -2.1511402 | -1.0816997 |
| C  | 2.4988611  | 0.7475567  | -0.5128825 |
| C  | 0.6127760  | 2.1498088  | -1.0815871 |
| C  | 0.7532133  | -2.4995471 | -0.5016717 |
| C  | 2.1368962  | -0.6060912 | -1.0941707 |
| H  | -3.0254700 | -1.3603324 | -1.2464935 |
| H  | -3.1141644 | -0.6221664 | 0.3770851  |
| H  | -1.1593950 | -3.0620160 | -1.3434228 |
| H  | -0.5027225 | -1.5336372 | -1.9844064 |
| H  | 3.1245158  | 0.6210775  | 0.3742173  |
| H  | 3.0342280  | 1.3584337  | -1.2492162 |
| H  | 1.1660542  | 3.0615641  | -1.3435930 |
| H  | 0.5105862  | 1.5324726  | -1.9843885 |
| H  | 0.6341727  | -3.1169184 | 0.3921661  |
| H  | 1.3637958  | -3.0391045 | -1.2351874 |
| H  | 3.0413208  | -1.1624324 | -1.3745268 |
| H  | 1.5042990  | -0.4975565 | -1.9856871 |
| O  | -1.4185213 | 1.3042754  | -0.0555536 |
| C  | -0.7443695 | 2.4979236  | -0.4998818 |
| H  | -1.3558509 | 3.0386209  | -1.2319227 |
| H  | -0.6226780 | 3.1138447  | 0.3945862  |
| C  | -2.1294963 | 0.6052728  | -1.0921841 |
| H  | -1.4979752 | 0.4973679  | -1.9844724 |
| H  | -3.0344508 | 1.1615555  | -1.3707293 |

**ClLi<sub>3</sub> [ClLi(THF)<sub>3</sub>**

41

Energy = -1165.708873408

|    |           |            |            |
|----|-----------|------------|------------|
| Cl | 0.8615771 | 0.1133934  | -0.6681205 |
| Li | 2.9325778 | 0.9661965  | -0.3029879 |
| O  | 4.2833469 | 0.1942249  | -1.5031032 |
| O  | 2.9749768 | 2.9219029  | -0.5903930 |
| O  | 3.5431290 | 0.7104578  | 1.5498454  |
| C  | 3.7995009 | -0.4132910 | -2.7375651 |
| C  | 5.4066808 | -0.5831437 | -0.9850177 |
| C  | 1.7027399 | 3.6094490  | -0.4781088 |
| C  | 3.6754626 | 3.5045935  | -1.7246865 |
| C  | 2.8121309 | -0.2310380 | 2.3925325  |
| C  | 3.9167521 | 1.8370078  | 2.3782166  |
| C  | 4.2854604 | -1.8542297 | -2.6764421 |
| H  | 2.7126125 | -0.3037973 | -2.7375381 |
| H  | 4.2366989 | 0.1262073  | -3.5884326 |
| C  | 5.6608065 | -1.6914770 | -2.0092166 |
| H  | 5.1118204 | -0.9782454 | -0.0077365 |
| H  | 6.2573943 | 0.0925545  | -0.8559975 |
| C  | 1.2616955 | 3.7910578  | -1.9243523 |
| H  | 1.0453942 | 2.9652874  | 0.1083501  |
| H  | 1.8558713 | 4.5699290  | 0.0342456  |
| C  | 2.5908291 | 4.1022460  | -2.6494540 |
| H  | 4.2529882 | 2.6982560  | -2.1800486 |
| H  | 4.3613985 | 4.2747653  | -1.3529400 |
| C  | 2.3075607 | 0.5740622  | 3.6098180  |
| H  | 2.0091929 | -0.6340647 | 1.7715688  |
| H  | 3.4964410 | -1.0344461 | 2.6884155  |
| C  | 2.7137023 | 2.0290427  | 3.2927961  |
| H  | 4.1185374 | 2.6733402  | 1.7071370  |
| H  | 4.8232166 | 1.5855964  | 2.9470401  |
| H  | 3.6156576 | -2.4472788 | -2.0445534 |
| H  | 4.3419666 | -2.3191666 | -3.6641512 |
| H  | 6.0221116 | -2.6084080 | -1.5367221 |
| H  | 6.4019548 | -1.3689129 | -2.7481137 |
| H  | 0.8338396 | 2.8493779  | -2.2801828 |
| H  | 0.5216168 | 4.5869217  | -2.0436287 |
| H  | 2.6214934 | 3.6596240  | -3.6479016 |
| H  | 2.7345893 | 5.1813007  | -2.7543241 |
| H  | 1.2285486 | 0.4687237  | 3.7443978  |
| H  | 2.7991309 | 0.2308707  | 4.5247754  |
| H  | 1.9163601 | 2.5432340  | 2.7468997  |
| H  | 2.9508450 | 2.6062503  | 4.1904898  |

**(ClLi)<sub>4</sub> [ClLi(THF)<sub>4</sub>**

60

Energy = -2802.065823960

|    |            |            |           |
|----|------------|------------|-----------|
| Cl | 1.8228550  | -0.0029614 | 1.2819008 |
| Li | 0.0024251  | -1.5066636 | 1.0527409 |
| O  | -0.0215481 | -2.9001799 | 2.3787330 |

|    |            |            |            |
|----|------------|------------|------------|
| C  | 1.0214676  | -2.9002468 | 3.3906994  |
| C  | -1.2565527 | -3.0999999 | 3.1208337  |
| C  | 0.4407953  | -2.0665549 | 4.5359229  |
| C  | -1.0945989 | -2.2727188 | 4.4068455  |
| Cl | -1.8337894 | -0.0076777 | 1.2805055  |
| Li | -0.0133828 | 1.4953283  | 1.0517085  |
| O  | 0.0139092  | 2.8913410  | 2.3734063  |
| C  | 1.2542101  | 3.0988665  | 3.1045956  |
| C  | -1.0205565 | 2.8879578  | 3.3940825  |
| C  | 1.1070140  | 2.2747176  | 4.3944825  |
| C  | -0.4260085 | 2.0590737  | 4.5355455  |
| H  | 1.2094815  | -3.9384047 | 3.6934686  |
| H  | 1.9160599  | -2.4764851 | 2.9328567  |
| H  | -1.3574610 | -4.1711699 | 3.3347727  |
| H  | -2.0747612 | -2.7707919 | 2.4791569  |
| H  | 0.8278116  | -2.3870337 | 5.5062623  |
| H  | 0.6992149  | -1.0145106 | 4.3925655  |
| H  | -1.5138810 | -2.7999256 | 5.2672353  |
| H  | -1.6072244 | -1.3131162 | 4.3085956  |
| H  | 2.0684420  | 2.7713268  | 2.4570182  |
| H  | 1.3520980  | 4.1711151  | 3.3143848  |
| H  | -1.9168681 | 2.4591365  | 2.9443563  |
| H  | -1.2112204 | 3.9256404  | 3.6968473  |
| H  | 1.6251252  | 1.3181371  | 4.2957617  |
| H  | 1.5289440  | 2.8076951  | 5.2500142  |
| H  | -0.6788091 | 1.0052924  | 4.3949832  |
| H  | -0.8076567 | 2.3778389  | 5.5085692  |
| Cl | 0.0002967  | 1.8222385  | -1.2812136 |
| Li | -1.5054459 | 0.0034629  | -1.0525128 |
| O  | -2.8985591 | -0.0181713 | -2.3790415 |
| C  | -2.8980370 | 1.0257578  | -3.3900438 |
| C  | -3.0996460 | -1.2523145 | -3.1221971 |
| C  | -2.0653139 | 0.4454054  | -4.5361614 |
| C  | -2.2723268 | -1.0899644 | -4.4081117 |
| Cl | -0.0088510 | -1.8345398 | -1.2803206 |
| Li | 1.4961012  | -0.0159088 | -1.0512764 |
| O  | 2.8920059  | 0.0101679  | -2.3732073 |
| C  | 3.1015944  | 1.2507565  | -3.1033101 |
| C  | 2.8868444  | -1.0233573 | -3.3948269 |
| C  | 2.2768895  | 1.1061680  | -4.3931172 |
| C  | 2.0588520  | -0.4263790 | -4.5356928 |
| H  | -3.9361397 | 1.2150046  | -3.6922356 |
| H  | -2.4732721 | 1.9195384  | -2.9315533 |
| H  | -4.1709329 | -1.3520019 | -3.3361542 |
| H  | -2.7711755 | -2.0714093 | -2.4812762 |
| H  | -2.3861577 | 0.8333172  | -5.5060230 |
| H  | -1.0130302 | 0.7031003  | -4.3932761 |
| H  | -2.7997354 | -1.5084106 | -5.2687816 |
| H  | -1.3129973 | -1.6031760 | -4.3101850 |
| H  | 2.7756263  | 2.0649873  | -2.4549366 |
| H  | 4.1739725  | 1.3469305  | -3.3132239 |

|   |           |            |            |
|---|-----------|------------|------------|
| H | 2.4566081 | -1.9193753 | -2.9458722 |
| H | 3.9241839 | -1.2154320 | -3.6978776 |
| H | 1.3211378 | 1.6256433  | -4.2935797 |
| H | 2.8102878 | 1.5281556  | -5.2483605 |
| H | 1.0046720 | -0.6776529 | -4.3953881 |
| H | 2.3770132 | -0.8075672 | -5.5090947 |

Cl<sup>-</sup> chloride anion

1

Energy = -460.3887073905

|    |            |           |           |
|----|------------|-----------|-----------|
| Cl | -0.0000765 | 0.0000001 | 0.0674709 |
|----|------------|-----------|-----------|

**HnLic<sup>+</sup>** MeNH<sub>2</sub>Li(12-crown-4)

36

Energy = -719.1216738832

|    |            |            |            |
|----|------------|------------|------------|
| Li | -0.1657800 | -0.0291633 | -0.0253254 |
| O  | 0.6504972  | 0.9750059  | 1.6224217  |
| C  | 0.2582765  | 0.2807448  | 2.8243876  |
| C  | 2.0795489  | 1.0862696  | 1.4424665  |
| C  | -1.2227162 | -0.0091993 | 2.6754707  |
| H  | 0.4436654  | 0.9132514  | 3.7014251  |
| H  | 0.8362199  | -0.6463497 | 2.9328717  |
| C  | 2.6211549  | -0.1672373 | 0.7829814  |
| H  | 2.5765122  | 1.2716100  | 2.4008806  |
| H  | 2.2255936  | 1.9502734  | 0.7895527  |
| O  | -1.4654799 | -0.7384038 | 1.4518737  |
| H  | -1.7828771 | 0.9238404  | 2.5760841  |
| H  | -1.6020312 | -0.5664517 | 3.5388145  |
| O  | 1.8706567  | -0.3295219 | -0.4377774 |
| H  | 2.4902299  | -1.0452785 | 1.4292348  |
| H  | 3.6888379  | -0.0563516 | 0.5560703  |
| C  | -1.2971936 | -2.1661825 | 1.5718011  |
| C  | 2.0357542  | -1.6187200 | -1.0671043 |
| C  | -1.2725043 | -2.7055445 | 0.1547515  |
| H  | -0.3628305 | -2.3952632 | 2.1009894  |
| H  | -2.1334512 | -2.5966003 | 2.1367078  |
| C  | 1.0688582  | -2.6198480 | -0.4651667 |
| H  | 1.8069613  | -1.4608401 | -2.1238660 |
| H  | 3.0701480  | -1.9661915 | -0.9715668 |
| O  | -0.2442646 | -2.0418868 | -0.6118743 |
| H  | -1.1186204 | -3.7900847 | 0.1510332  |
| H  | -2.2116234 | -2.4747359 | -0.3541414 |
| H  | 1.1199077  | -3.5777712 | -0.9975988 |
| H  | 1.2896651  | -2.7969146 | 0.5957371  |
| N  | -1.0320922 | 1.1762798  | -1.4091575 |
| C  | -0.5646525 | 0.8695270  | -2.7854082 |
| H  | -2.0490964 | 1.0904827  | -1.3790547 |
| H  | 0.5185207  | 1.0090697  | -2.8274621 |
| H  | -0.7861782 | -0.1775244 | -3.0066456 |
| H  | -1.0323074 | 1.5005543  | -3.5502542 |
| H  | -0.8460421 | 2.1599870  | -1.2088087 |

**Hn** MeNH<sub>2</sub>

7

Energy = -95.91823399162

|   |            |            |           |
|---|------------|------------|-----------|
| C | -0.0967579 | 0.8009561  | 3.4598507 |
| H | 0.6668728  | 1.5460297  | 3.2153894 |
| H | -1.0838673 | 1.2829835  | 3.3839090 |
| H | 0.0543210  | 0.4940076  | 4.4996816 |
| N | 0.0781007  | -0.3733228 | 2.5809540 |
| H | -0.6497410 | -1.0579618 | 2.7875704 |
| H | -0.0815486 | -0.0934519 | 1.6128332 |

**HoLic<sup>+</sup>** MeOHLi(12-crown-4)

35

Energy = -738.9924998212

|    |            |            |            |
|----|------------|------------|------------|
| Li | -0.2504482 | -0.2081157 | -0.1038057 |
| O  | 0.5774657  | 0.9648669  | 1.4157262  |
| C  | 0.2343437  | 0.3819869  | 2.6893186  |
| C  | 1.9962034  | 1.1034178  | 1.1840668  |
| C  | -1.2425370 | 0.0478424  | 2.6057621  |
| H  | 0.4249791  | 1.1005688  | 3.4960733  |
| H  | 0.8374261  | -0.5172523 | 2.8711767  |
| C  | 2.5595830  | -0.1866129 | 0.6200723  |
| H  | 2.5136176  | 1.3872275  | 2.1067604  |
| H  | 2.0953926  | 1.9110867  | 0.4546313  |
| O  | -1.4947448 | -0.7990332 | 1.4614597  |
| H  | -1.8263794 | 0.9550708  | 2.4329664  |
| H  | -1.5895905 | -0.4344787 | 3.5256922  |
| O  | 1.7726563  | -0.4846881 | -0.5518553 |
| H  | 2.4825105  | -1.0059720 | 1.3466986  |
| H  | 3.6136298  | -0.0622717 | 0.3427819  |
| C  | -1.2881162 | -2.2051776 | 1.7146473  |
| C  | 1.9581371  | -1.8218876 | -1.0659750 |
| C  | -1.2797611 | -2.8791168 | 0.3565804  |
| H  | -0.3367939 | -2.3587328 | 2.2406239  |
| H  | -2.1007684 | -2.5969094 | 2.3386734  |
| C  | 1.0420908  | -2.7883275 | -0.3403820 |
| H  | 1.6901950  | -1.7692666 | -2.1240895 |
| H  | 3.0054698  | -2.1288907 | -0.9748567 |
| O  | -0.2912428 | -2.2606472 | -0.4958954 |
| H  | -1.0901359 | -3.9535431 | 0.4530741  |
| H  | -2.2370460 | -2.7275208 | -0.1480340 |
| H  | 1.1043899  | -3.7900490 | -0.7832315 |
| H  | 1.3012664  | -2.8589803 | 0.7243019  |
| O  | -1.0163436 | 0.8609934  | -1.4957620 |
| C  | -0.2779714 | 1.4635843  | -2.5851741 |
| H  | -1.9573812 | 1.0640324  | -1.6051135 |
| H  | 0.7694117  | 1.2085389  | -2.4214555 |
| H  | -0.6120138 | 1.0575932  | -3.5447208 |
| H  | -0.4000233 | 2.5508420  | -2.5743409 |

**Ho** MeOH

6

Energy = -115.7944957160

|   |            |            |           |
|---|------------|------------|-----------|
| H | -0.0167505 | -0.0798849 | 1.6886658 |
| O | 0.0868426  | -0.3691789 | 2.6089528 |
| C | -0.0856265 | 0.7846988  | 3.4505439 |
| H | 0.6412692  | 1.5710323  | 3.2097064 |
| H | -1.1009396 | 1.1942718  | 3.3697081 |
| H | 0.0818657  | 0.4480587  | 4.4760684 |

**Li<sub>2</sub><sup>+</sup>** Li(12-crown-4)<sub>2</sub><sup>+</sup>

57

Energy = -1238.900467273

|    |            |            |            |
|----|------------|------------|------------|
| Li | -0.0003150 | 0.0005907  | 0.0007573  |
| O  | -0.5697131 | 1.8735502  | 1.3425857  |
| O  | 0.5695662  | -1.8724804 | 1.3423322  |
| O  | 1.8724055  | 0.5699129  | 1.3424621  |
| O  | -1.8725964 | -0.5688720 | 1.3425340  |
| C  | 1.5176303  | -1.5980735 | 2.3821053  |
| C  | -1.5176602 | 1.5990639  | 2.3824294  |
| C  | 1.5984390  | 1.5181563  | 2.3821503  |
| C  | 0.6252513  | 2.5258760  | 1.8022174  |
| C  | 2.5251947  | -0.6248489 | 1.8020158  |
| C  | -0.6253037 | -2.5248432 | 1.8021053  |
| C  | -2.5252827 | 0.6258886  | 1.8023344  |
| C  | -1.5984604 | -1.5171493 | 2.3821198  |
| H  | 2.0175145  | -2.5263016 | 2.6943400  |
| H  | 1.0140583  | -1.1688799 | 3.2589412  |
| H  | 1.1696363  | 1.0148290  | 3.2593055  |
| H  | -2.0175809 | 2.5272449  | 2.6947518  |
| H  | -1.0139867 | 1.1698902  | 3.2592322  |
| H  | 0.3852022  | 3.3002305  | 2.5421342  |
| H  | 2.9898507  | -1.0587564 | 0.9141080  |
| H  | 1.0592397  | 2.9905210  | 0.9143845  |
| H  | -1.1696344 | -1.0137519 | 3.2592222  |
| H  | 2.5267894  | 2.0180670  | 2.6939315  |
| H  | 3.2996635  | -0.3846090 | 2.5417295  |
| H  | -2.9899772 | 1.0599083  | 0.9145401  |
| H  | -0.3851430 | -3.2991723 | 2.5420243  |
| H  | -1.0594127 | -2.9894984 | 0.9143448  |
| H  | -3.2996536 | 0.3855218  | 2.5421177  |
| H  | -2.5267255 | -2.0171543 | 2.6939976  |
| O  | 0.5693279  | 1.8729761  | -1.3411695 |
| O  | -0.5704726 | -1.8728327 | -1.3412944 |
| O  | -1.8731823 | 0.5697605  | -1.3412224 |
| O  | 1.8719174  | -0.5694992 | -1.3410959 |
| C  | -1.5186956 | -1.5984890 | -2.3809630 |
| C  | 1.5175857  | 1.5987643  | -2.3808073 |
| C  | -1.5985218 | 1.5176830  | -2.3810222 |
| C  | -0.6255038 | 2.5254456  | -1.8009188 |
| C  | -2.5259753 | -0.6249614 | -1.8008138 |

|   |            |            |            |
|---|------------|------------|------------|
| C | 0.6243497  | -2.5252254 | -1.8010273 |
| C | 2.5248380  | 0.6251805  | -1.8007161 |
| C | 1.5974570  | -1.5173986 | -2.3809084 |
| H | -2.0190595 | -2.5266351 | -2.6926694 |
| H | -1.0152823 | -1.1699009 | -3.2582245 |
| H | -1.1690058 | 1.0139844  | -3.2576047 |
| H | 2.0179348  | 2.5269391  | -2.6924518 |
| H | 1.0141615  | 1.1702595  | -3.2580996 |
| H | -0.3853379 | 3.2998328  | -2.5407398 |
| H | -2.9905790 | -1.0588654 | -0.9128650 |
| H | -1.0595622 | 2.9901513  | -0.9131201 |
| H | 1.1680876  | -1.0136455 | -3.2575350 |
| H | -2.5266275 | 2.0175324  | -2.6936561 |
| H | -3.3004833 | -0.3846998 | -2.5404744 |
| H | 2.9894665  | 1.0590210  | -0.9127509 |
| H | 0.3842465  | -3.2994562 | -2.5410431 |
| H | 1.0583541  | -2.9901045 | -0.9133063 |
| H | 3.2992393  | 0.3847422  | -2.5404052 |
| H | 2.5256242  | -2.0172346 | -2.6934332 |

**LiCl<sub>m</sub>** (LiCl)<sub>28</sub> nano-cluster

56

Energy = -13101.51894196

|    |            |            |            |
|----|------------|------------|------------|
| Li | 4.7101014  | 2.0818359  | -0.0645311 |
| Li | 4.6112011  | -1.1347229 | -1.9934664 |
| Li | 4.6879550  | -1.1994903 | 1.7448033  |
| Li | -3.8971741 | -0.9263781 | 1.5803666  |
| Li | -3.9450773 | -0.7250583 | -1.5386545 |
| Li | -3.8712608 | 1.8767837  | 0.2053839  |
| Li | -3.5951888 | 1.7681553  | -3.2228729 |
| Li | -3.6416862 | -3.6291342 | 0.2488602  |
| Li | -3.4738989 | 2.0599865  | 3.2103889  |
| Li | 2.2150416  | -0.0425504 | -0.0497925 |
| Li | 2.5068039  | -0.0245313 | 3.4920674  |
| Li | 1.8384768  | -2.9359043 | 2.5512524  |
| Li | 2.4433334  | 3.0126094  | -1.8402075 |
| Li | 1.9294860  | 3.6531644  | 1.1792460  |
| Li | 1.7495501  | -0.8330248 | -3.8440888 |
| Li | 2.3375832  | -3.1358719 | -1.8125928 |
| Li | -0.8602253 | -4.3188913 | 2.6670511  |
| Li | -0.7597551 | 0.7993001  | -1.9217346 |
| Li | -0.9249313 | -0.1080939 | -5.0653621 |
| Li | -0.2813359 | 3.3888894  | -3.8707770 |
| Li | -0.4003751 | -5.0321200 | -0.9882679 |
| Li | -0.7740529 | -2.0518699 | 0.3051955  |
| Li | -0.4884116 | -2.8991836 | -3.1375972 |
| Li | -0.1375022 | 1.6586416  | 4.8799052  |
| Li | -0.6845689 | 1.2978259  | 1.6694217  |
| Li | -0.6945426 | 4.4643949  | 2.4600478  |
| Li | -0.3026539 | 4.1931887  | -0.9476068 |
| Li | -0.2966607 | -1.2600914 | 4.1017578  |

|    |            |            |            |
|----|------------|------------|------------|
| Cl | -5.1459703 | 1.3398049  | -1.6490218 |
| Cl | -5.1929089 | -2.0357154 | -0.0976833 |
| Cl | -5.0918742 | 0.9923465  | 2.0653562  |
| Cl | 3.7266098  | 0.9898190  | -1.8880296 |
| Cl | 3.7286372  | -2.0810810 | 3.5785408  |
| Cl | 3.7990455  | 0.9684237  | 1.7332176  |
| Cl | 3.7116869  | -2.1704093 | -0.0981380 |
| Cl | 3.7510601  | 4.1162158  | -0.1702924 |
| Cl | 3.5754160  | -2.2420055 | -3.6562742 |
| Cl | -2.5402479 | -0.3134082 | -3.4366672 |
| Cl | -1.9608010 | 3.0760507  | -2.2689949 |
| Cl | -2.1778779 | 0.0454944  | 0.0489458  |
| Cl | -2.0792371 | -3.4610513 | -1.4352511 |
| Cl | -2.4914600 | -2.7925459 | 2.1106551  |
| Cl | -2.3971124 | 3.2466045  | 1.5060112  |
| Cl | -1.8878170 | 0.5088787  | 3.8308093  |
| Cl | 1.1678282  | 4.7080765  | -2.7616757 |
| Cl | 1.2547119  | -0.0210730 | 5.4376887  |
| Cl | 0.3581960  | -3.4626619 | 4.3555811  |
| Cl | 0.7534468  | -0.7849958 | 1.8835600  |
| Cl | 0.8226165  | 2.8117070  | 3.1341626  |
| Cl | 0.4418785  | 5.4934495  | 0.8142438  |
| Cl | 0.7494638  | 2.0215809  | -0.2961327 |
| Cl | 0.1917186  | -2.0594182 | -5.1829002 |
| Cl | 0.6334675  | -4.1515291 | 0.8710372  |
| Cl | 0.6752996  | -1.2782117 | -1.6337930 |
| Cl | 0.9721106  | -4.7527439 | -2.7505286 |
| Cl | 0.6518823  | 1.2905387  | -4.0426222 |

**Liet<sup>+</sup>** Li(12-crown-4)(THF)<sup>+</sup>  
42

Energy = -855.7938526787

|    |            |            |            |
|----|------------|------------|------------|
| Li | -0.2318508 | -0.2069760 | -0.1113055 |
| O  | -0.2616409 | -2.2367719 | -0.5271365 |
| O  | -1.0024250 | 0.9911602  | -1.3806540 |
| O  | 0.5597888  | 0.9642999  | 1.4204598  |
| O  | -1.4974623 | -0.8041933 | 1.4333421  |
| O  | 1.8002879  | -0.4678175 | -0.5401848 |
| C  | 0.2124553  | 0.3753953  | 2.6890620  |
| C  | -0.3605848 | 1.2854040  | -2.6616058 |
| C  | 1.0672017  | -2.7707969 | -0.3516758 |
| C  | -1.3038745 | -2.2150187 | 1.6666653  |
| C  | -1.2682771 | -2.8659363 | 0.2968976  |
| C  | -1.7496577 | 2.1631867  | -0.9240823 |
| C  | -0.4709342 | 2.7965217  | -2.8301086 |
| C  | -1.2608068 | 0.0258637  | 2.5922363  |
| C  | -1.8016527 | 3.1014747  | -2.1248108 |
| C  | 1.9778491  | 1.1191194  | 1.2004026  |
| C  | 2.0013152  | -1.8030596 | -1.0520139 |
| C  | 2.5624459  | -0.1657151 | 0.6460453  |
| H  | 0.6676268  | 0.9194609  | -2.6083808 |

|   |            |            |            |
|---|------------|------------|------------|
| H | 0.3892339  | 1.0936594  | 3.4995419  |
| H | 0.8231496  | -0.5183189 | 2.8738046  |
| H | -0.3667395 | -2.3836065 | 2.2130552  |
| H | 0.3568688  | 3.2992334  | -2.3181897 |
| H | -1.2061847 | 2.6049758  | -0.0807961 |
| H | 1.1326724  | -3.7695810 | -0.8004350 |
| H | 1.3057453  | -2.8494683 | 0.7171528  |
| H | -1.0812995 | -3.9420266 | 0.3797685  |
| H | -0.9040106 | 0.7445912  | -3.4442496 |
| H | -1.8543482 | 0.9291800  | 2.4317308  |
| H | -0.4633152 | 3.0954188  | -3.8810230 |
| H | -2.7299591 | 1.8175569  | -0.5867928 |
| H | -2.2145113 | -2.7048533 | -0.2248035 |
| H | 2.4787528  | -0.9864161 | 1.3707953  |
| H | -2.1332723 | -2.6136105 | 2.2639181  |
| H | -1.6063543 | -0.4750969 | 3.5027203  |
| H | 1.7627822  | -1.7493103 | -2.1172464 |
| H | -1.8979037 | 4.1474755  | -1.8244530 |
| H | 2.4839559  | 1.4128575  | 2.1264524  |
| H | 2.0740100  | 1.9237729  | 0.4671710  |
| H | -2.6450341 | 2.8448283  | -2.7743955 |
| H | 3.0458632  | -2.1101622 | -0.9333754 |
| H | 3.6205671  | -0.0320850 | 0.3891793  |

**Lic<sup>+</sup>** Li(12-crown-4)<sup>+</sup>

29

Energy = -623.1790335421

|    |            |            |            |
|----|------------|------------|------------|
| Li | -0.1833361 | -0.2571869 | -0.0373083 |
| O  | -0.2619833 | -2.2370187 | -0.5119998 |
| O  | 0.5647317  | 0.9571896  | 1.4199508  |
| O  | -1.4834096 | -0.8124067 | 1.4379530  |
| O  | 1.7890415  | -0.4730366 | -0.5267693 |
| C  | 0.2124909  | 0.3797563  | 2.6974386  |
| C  | 1.0683550  | -2.7813447 | -0.3581337 |
| C  | -1.3079225 | -2.2270040 | 1.6780078  |
| C  | -1.2674569 | -2.8783735 | 0.3086754  |
| C  | -1.2584304 | 0.0229774  | 2.5989075  |
| C  | 1.9887461  | 1.1145422  | 1.2112604  |
| C  | 1.9985831  | -1.8056193 | -1.0524730 |
| C  | 2.5699863  | -0.1687548 | 0.6509376  |
| H  | 0.3849800  | 1.1093019  | 3.4975336  |
| H  | 0.8280747  | -0.5081665 | 2.8916226  |
| H  | -0.3774221 | -2.4022759 | 2.2333322  |
| H  | 1.1235039  | -3.7723936 | -0.8237486 |
| H  | 1.3140859  | -2.8777914 | 0.7074051  |
| H  | -1.0704140 | -3.9520928 | 0.3891903  |
| H  | -1.8584705 | 0.9209592  | 2.4344710  |
| H  | -2.2133146 | -2.7234504 | -0.2157167 |
| H  | 2.4972218  | -0.9914580 | 1.3742859  |
| H  | -2.1472043 | -2.6134443 | 2.2685485  |
| H  | -1.6024040 | -0.4812108 | 3.5074480  |

|   |           |            |            |
|---|-----------|------------|------------|
| H | 1.7616009 | -1.7420119 | -2.1170838 |
| H | 2.4853203 | 1.3965971  | 2.1451769  |
| H | 2.0904128 | 1.9262871  | 0.4874138  |
| H | 3.0443604 | -2.1061306 | -0.9328468 |
| H | 3.6230840 | -0.0333129 | 0.3775632  |

**Li<sub>4</sub><sup>+</sup> Li(THF)<sub>4</sub><sup>+</sup>**

53

Energy = -937.8922194929

|    |            |            |            |
|----|------------|------------|------------|
| Li | -0.3885753 | -0.0906300 | -0.0801932 |
| O  | 0.6371916  | 1.0782378  | 1.0761203  |
| O  | 0.8174045  | -0.9427398 | -1.3197664 |
| O  | -1.7078200 | 0.9809485  | -0.9935922 |
| O  | -1.2119905 | -1.4337095 | 1.0241193  |
| C  | 1.2614383  | 2.2953318  | 0.5681594  |
| C  | 0.4843092  | 1.1728582  | 2.5269635  |
| C  | 0.3764858  | -2.0407324 | -2.1803507 |
| C  | 2.2435708  | -1.0815827 | -1.0474011 |
| C  | -2.4962302 | 2.0073471  | -0.3266091 |
| C  | -1.7111369 | 1.2230784  | -2.4370745 |
| C  | -2.5782035 | -1.3899340 | 1.5400218  |
| C  | -0.4730482 | -2.5088017 | 1.6754661  |
| C  | 1.0863320  | 3.3231061  | 1.6778979  |
| H  | 0.7632806  | 2.5536408  | -0.3695035 |
| H  | 2.3198189  | 2.0874362  | 0.3697045  |
| C  | 1.2157288  | 2.4493824  | 2.9352209  |
| H  | -0.5870439 | 1.2229587  | 2.7518814  |
| H  | 0.9038390  | 0.2660550  | 2.9701910  |
| C  | 1.6348150  | -2.8429854 | -2.5149104 |
| H  | -0.3556777 | -2.6298831 | -1.6171979 |
| H  | -0.1091094 | -1.6087139 | -3.0593131 |
| C  | 2.5535743  | -2.5469035 | -1.3186175 |
| H  | 2.7953130  | -0.4182591 | -1.7250566 |
| H  | 2.4092591  | -0.7643245 | -0.0154127 |
| C  | -2.5388989 | 3.1682806  | -1.3099628 |
| H  | -2.0028116 | 2.2367726  | 0.6209828  |
| H  | -3.4987130 | 1.6094126  | -0.1259291 |
| C  | -2.6246773 | 2.4296705  | -2.6548876 |
| H  | -0.6778868 | 1.4227633  | -2.7404636 |
| H  | -2.0652298 | 0.3147537  | -2.9318941 |
| C  | -2.7337570 | -2.6497272 | 2.3871866  |
| H  | -2.6855045 | -0.4792047 | 2.1415128  |
| H  | -3.2554137 | -1.3425774 | 0.6840796  |
| C  | -1.3026772 | -2.8783908 | 2.8981131  |
| H  | 0.5266676  | -2.1332709 | 1.9091532  |
| H  | -0.3901385 | -3.3474614 | 0.9734389  |
| H  | 0.0915059  | 3.7789368  | 1.6255806  |
| H  | 1.8360842  | 4.1164310  | 1.6293141  |
| H  | 0.7756986  | 2.9073993  | 3.8240040  |
| H  | 2.2700541  | 2.2366509  | 3.1388255  |
| H  | 1.4182426  | -3.9066230 | -2.6390138 |

|   |            |            |            |
|---|------------|------------|------------|
| H | 2.0898750  | -2.4731969 | -3.4393623 |
| H | 2.2780526  | -3.1623608 | -0.4553209 |
| H | 3.6103785  | -2.7120440 | -1.5417049 |
| H | -1.6158624 | 3.7551444  | -1.2489829 |
| H | -3.3878380 | 3.8328733  | -1.1323398 |
| H | -2.2990543 | 3.0393436  | -3.5005967 |
| H | -3.6533022 | 2.1035159  | -2.8378601 |
| H | -3.4605501 | -2.5155440 | 3.1917390  |
| H | -3.0531733 | -3.4927247 | 1.7655832  |
| H | -1.0793371 | -2.2031844 | 3.7310570  |
| H | -1.1233349 | -3.9055977 | 3.2239112  |

**MeOLic or MeOLi(12c4)**

34

Energy = -738.5003735239

|    |            |            |            |
|----|------------|------------|------------|
| Li | 0.0376864  | -0.2788982 | 0.9976040  |
| O  | -1.2939046 | -1.6081356 | -0.1295689 |
| O  | 1.3435564  | 1.2467146  | 0.0919861  |
| O  | 1.4522237  | -1.5004536 | -0.1467281 |
| C  | -2.4764512 | -0.8783706 | -0.5060210 |
| C  | -0.6023989 | -2.2171615 | -1.2318820 |
| C  | 2.5156687  | 0.5959650  | -0.4277911 |
| C  | 0.6319327  | 2.0368760  | -0.8726968 |
| C  | 0.7566589  | -2.6334012 | -0.7004632 |
| C  | 2.1440108  | -0.7014974 | -1.1211807 |
| H  | -3.0364941 | -1.4179316 | -1.2794648 |
| H  | -3.0821639 | -0.8199344 | 0.4016237  |
| H  | -1.1598686 | -3.0932714 | -1.5908923 |
| H  | -0.5017343 | -1.5061455 | -2.0631793 |
| H  | 3.1455812  | 0.3892867  | 0.4412298  |
| H  | 3.0568259  | 1.2579658  | -1.1149494 |
| H  | 1.1798977  | 2.9664198  | -1.0799065 |
| H  | 0.5176350  | 1.4862745  | -1.8166736 |
| H  | 0.6346311  | -3.3343842 | 0.1292183  |
| H  | 1.3527327  | -3.1087189 | -1.4889580 |
| H  | 3.0465182  | -1.2237148 | -1.4667686 |
| H  | 1.4995072  | -0.5131022 | -1.9905860 |
| O  | -1.4042235 | 1.1348488  | 0.1043222  |
| C  | -0.7178094 | 2.3470598  | -0.2532078 |
| H  | -1.3253960 | 2.9520521  | -0.9374584 |
| H  | -0.5810776 | 2.8901980  | 0.6850740  |
| C  | -2.1149132 | 0.5171824  | -0.9790536 |
| H  | -1.4878837 | 0.4791296  | -1.8805083 |
| H  | -3.0225293 | 1.0906115  | -1.2141243 |
| O  | 0.0492696  | -0.3525992 | 2.7733528  |
| C  | -0.0869199 | 0.7729180  | 3.5637471  |
| H  | 0.6246658  | 1.5922812  | 3.2983168  |
| H  | -1.1013346 | 1.2363086  | 3.5062258  |
| H  | 0.0835399  | 0.5753097  | 4.6485767  |

PhCCPh tolane

24

Energy = -539.7930404158

|   |            |            |            |
|---|------------|------------|------------|
| C | -2.0291365 | 0.0000010  | 0.0014459  |
| C | -2.7461547 | -1.2150390 | 0.0106082  |
| C | -2.7461276 | 1.2150589  | -0.0077172 |
| C | -4.1378372 | -1.2091383 | 0.0092352  |
| H | -2.1998051 | -2.1530625 | 0.0192023  |
| C | -4.1378080 | 1.2091674  | -0.0094492 |
| H | -2.1997540 | 2.1530923  | -0.0131230 |
| C | -4.8389834 | 0.0000115  | -0.0014681 |
| H | -4.6780932 | -2.1514737 | 0.0168550  |
| H | -4.6780442 | 2.1515139  | -0.0171410 |
| H | -5.9250402 | 0.0000163  | -0.0041362 |
| C | -0.6091815 | -0.0000111 | 0.0007776  |
| C | 0.6091409  | 0.0000193  | 0.0000673  |
| C | 2.0291274  | 0.0000169  | -0.0005938 |
| C | 2.7461344  | -1.2150483 | -0.0099586 |
| C | 2.7461551  | 1.2150721  | 0.0083832  |
| C | 4.1378212  | -1.2091602 | -0.0096929 |
| H | 2.1997579  | -2.1530726 | -0.0177008 |
| C | 4.1378414  | 1.2091519  | 0.0089838  |
| H | 2.1997972  | 2.1531180  | 0.0146768  |
| C | 4.8389864  | -0.0000156 | 0.0003106  |
| H | 4.6780602  | -2.1515009 | -0.0176425 |
| H | 4.6780974  | 2.1514881  | 0.0162950  |
| H | 5.9250432  | -0.0000264 | 0.0018103  |

**Be** CH<sub>2</sub>=CMe<sub>2</sub>

12

Energy = -157.3223473943

|   |            |            |            |
|---|------------|------------|------------|
| C | -0.0001678 | 1.4626299  | 0.0000016  |
| C | -0.0000130 | 0.1238090  | -0.0000014 |
| H | -0.0002377 | 2.0305389  | 0.9277415  |
| H | -0.0002876 | 2.0305406  | -0.9277395 |
| C | 0.0000040  | -0.6768534 | -1.2764859 |
| C | 0.0001414  | -0.6768528 | 1.2764849  |
| H | 0.8800913  | -1.3320785 | -1.3219179 |
| H | -0.8804670 | -1.3315529 | -1.3221953 |
| H | 0.0003365  | -0.0305136 | -2.1586817 |
| H | -0.8798030 | -1.3322704 | 1.3219091  |
| H | 0.8807544  | -1.3313608 | 1.3222055  |
| H | -0.0003394 | -0.0305110 | 2.1586792  |

**tBuLi** (tBuLi)<sub>4</sub> tetramer

56

Energy = -661.9537502791

|   |            |            |           |
|---|------------|------------|-----------|
| C | -0.1967287 | -0.3314666 | 2.2067120 |
| C | -1.1735672 | -1.4781766 | 2.5366672 |
| C | 1.1515151  | -0.6989938 | 2.8590346 |
| C | -0.7169539 | 0.9189563  | 2.9445000 |
| H | -2.1957814 | -1.3001685 | 2.1591196 |

|    |            |            |            |
|----|------------|------------|------------|
| H  | -0.8350065 | -2.4429456 | 2.1311132  |
| H  | -1.2890656 | -1.6228580 | 3.6293925  |
| H  | 1.8936978  | 0.1067695  | 2.7624604  |
| H  | 1.0458762  | -0.8973870 | 3.9443118  |
| H  | 1.6010249  | -1.6166611 | 2.4404607  |
| H  | -0.7745156 | 0.7590418  | 4.0397069  |
| H  | -0.0661084 | 1.8017670  | 2.8159000  |
| H  | -1.7278722 | 1.2037442  | 2.6195706  |
| C  | 0.2061221  | -1.9751608 | -1.0402204 |
| C  | 0.7100818  | -1.8191678 | -2.4893803 |
| C  | 1.1968097  | -2.9176279 | -0.3271370 |
| C  | -1.1382915 | -2.7267269 | -1.1200493 |
| H  | 0.0469621  | -1.1966423 | -3.1154216 |
| H  | 1.7169817  | -1.3792679 | -2.5352744 |
| H  | 0.7719717  | -2.7939089 | -3.0132068 |
| H  | 0.8720861  | -3.1691457 | 0.6931799  |
| H  | 1.3113494  | -3.8806369 | -0.8636357 |
| H  | 2.2171371  | -2.5021096 | -0.2575006 |
| H  | -1.0324542 | -3.7132769 | -1.6137422 |
| H  | -1.5726497 | -2.9449744 | -0.1287581 |
| H  | -1.8927708 | -2.1718757 | -1.6969401 |
| C  | 1.8155269  | 1.2514496  | -0.4058027 |
| C  | 1.9250755  | 2.4569779  | 0.5499352  |
| C  | 3.1188083  | 0.4422706  | -0.2480095 |
| C  | 1.8213428  | 1.8225066  | -1.8383399 |
| H  | 1.0616532  | 3.1417373  | 0.4841305  |
| H  | 2.0233319  | 2.1488918  | 1.6009629  |
| H  | 2.8108171  | 3.0839898  | 0.3249197  |
| H  | 3.1794961  | -0.3939552 | -0.9600841 |
| H  | 4.0178550  | 1.0659178  | -0.4234562 |
| H  | 3.2496815  | 0.0250426  | 0.7657135  |
| H  | 2.7384361  | 2.4086530  | -2.0470778 |
| H  | 1.7952714  | 1.0402715  | -2.6171138 |
| H  | 0.9738684  | 2.4995134  | -2.0203846 |
| C  | -1.8240649 | 1.0578534  | -0.7601682 |
| C  | -1.9407459 | 0.9973278  | -2.2967776 |
| C  | -3.1251557 | 0.4524772  | -0.1947024 |
| C  | -1.8293217 | 2.5512424  | -0.3751518 |
| H  | -1.0781046 | 1.4501926  | -2.8161978 |
| H  | -2.0442870 | -0.0333980 | -2.6660812 |
| H  | -2.8261224 | 1.5515630  | -2.6671704 |
| H  | -3.1809405 | 0.5333890  | 0.9008265  |
| H  | -4.0256145 | 0.9627604  | -0.5908314 |
| H  | -3.2578611 | -0.6119346 | -0.4557735 |
| H  | -2.7461102 | 3.0658226  | -0.7256804 |
| H  | -1.8037193 | 2.7178751  | 0.7158734  |
| H  | -0.9814979 | 3.0981470  | -0.8131676 |
| Li | 0.1287073  | 0.2210598  | -1.4459330 |
| Li | -1.1894351 | -0.8195512 | 0.2656366  |
| Li | -0.1331173 | 1.2952218  | 0.6805301  |
| Li | 1.1963768  | -0.6944147 | 0.4985121  |



**tBuCl Me<sub>3</sub>CCl**

14

Energy = -618.1970674978

|    |            |            |            |
|----|------------|------------|------------|
| C  | -1.2655558 | -0.7306721 | 0.7955134  |
| C  | -0.0000013 | -0.0000380 | 0.3626850  |
| H  | -2.1591297 | -0.2186151 | 0.4286643  |
| H  | -1.2686632 | -1.7607349 | 0.4292182  |
| H  | -1.3015817 | -0.7510603 | 1.8916698  |
| C  | 1.2655516  | -0.7306786 | 0.7955078  |
| C  | 0.0000080  | 1.4612935  | 0.7956051  |
| H  | 2.1591392  | -0.2185032 | 0.4288557  |
| H  | 1.3014365  | -0.7512728 | 1.8916663  |
| H  | 1.2687464  | -1.7606762 | 0.4290355  |
| H  | 0.0001321  | 1.5026254  | 1.8917865  |
| H  | 0.8903376  | 1.9791399  | 0.4289763  |
| H  | -0.8904108 | 1.9791228  | 0.4291692  |
| Cl | -0.0000089 | 0.0000694  | -1.5133819 |

**tBuLic Me<sub>3</sub>CLi(12-crown-4)**

42

Energy = -781.1842671954

|    |            |            |            |
|----|------------|------------|------------|
| Li | -0.2005240 | -0.1282800 | -0.1844102 |
| O  | -0.2381696 | -2.3052233 | -0.4563365 |
| O  | 0.7262388  | 0.9320348  | 1.4913748  |
| O  | -1.4280066 | -0.7814147 | 1.4985785  |
| O  | 1.9159433  | -0.5940972 | -0.4641613 |
| C  | 0.3319421  | 0.3447705  | 2.7410665  |
| C  | 1.0703057  | -2.8619072 | -0.2519347 |
| C  | -1.2406422 | -2.1819492 | 1.7541315  |
| C  | -1.2550829 | -2.8605633 | 0.3968920  |
| C  | -1.1561258 | 0.0704271  | 2.6259311  |
| C  | 2.1483543  | 0.9803747  | 1.2806592  |
| C  | 2.0383117  | -1.9368233 | -0.9656560 |
| C  | 2.6527468  | -0.3460812 | 0.7436949  |
| H  | 0.5324265  | 1.0401729  | 3.5678784  |
| H  | 0.8920900  | -0.5822516 | 2.9259143  |
| H  | -0.2878635 | -2.3558513 | 2.2728623  |
| H  | 1.1222350  | -3.8750191 | -0.6739098 |
| H  | 1.3004609  | -2.9220060 | 0.8206958  |
| H  | -1.1258578 | -3.9448049 | 0.5018889  |
| H  | -1.6907560 | 1.0011202  | 2.4203692  |
| H  | -2.2018323 | -2.6578789 | -0.1101543 |
| H  | 2.4872960  | -1.1542605 | 1.4694047  |
| H  | -2.0534324 | -2.5656444 | 2.3861238  |
| H  | -1.5428443 | -0.3735444 | 3.5514723  |
| H  | 1.7816799  | -1.8754135 | -2.0263468 |
| H  | 2.6711593  | 1.2487824  | 2.2069693  |
| H  | 2.3055618  | 1.7664276  | 0.5377274  |
| H  | 3.0689862  | -2.2983756 | -0.8637118 |
| H  | 3.7285993  | -0.2906175 | 0.5274797  |

|   |            |            |            |
|---|------------|------------|------------|
| C | -1.1399169 | 1.1259346  | -1.5725515 |
| C | -2.1219564 | 2.0322246  | -0.8375694 |
| C | -0.1217585 | 2.0123991  | -2.2814057 |
| C | -1.9130721 | 0.3519077  | -2.6341553 |
| H | -2.9079163 | 1.4579805  | -0.3231121 |
| H | -1.6209902 | 2.6484231  | -0.0750433 |
| H | -2.6517156 | 2.7482104  | -1.5241599 |
| H | 0.6065756  | 1.4235895  | -2.8596975 |
| H | -0.5980133 | 2.7279900  | -3.0066729 |
| H | 0.4528922  | 2.6296042  | -1.5729672 |
| H | -2.4368663 | 1.0243445  | -3.3679663 |
| H | -1.2560056 | -0.3017801 | -3.2278682 |
| H | -2.6923121 | -0.2891712 | -2.1933604 |

**tBuLit<sub>2</sub> Me<sub>3</sub>CLi(THF)<sub>2</sub>**

40

Energy = -630.6769465552

|    |            |            |            |
|----|------------|------------|------------|
| Li | 0.6356448  | 0.4252955  | -3.4722488 |
| O  | -0.5184374 | 1.7902001  | -4.2320487 |
| O  | 0.5801451  | -1.0566756 | -4.7441684 |
| C  | -1.4566686 | 2.4257841  | -3.3261353 |
| C  | -1.2209761 | 1.6741779  | -5.4978328 |
| C  | -0.5753298 | -1.9224157 | -4.5339896 |
| C  | 1.7754061  | -1.8799771 | -4.9355912 |
| C  | -2.7859644 | 1.7316662  | -3.6211657 |
| H  | -1.0754831 | 2.2729060  | -2.3156173 |
| H  | -1.4962856 | 3.4995960  | -3.5531565 |
| C  | -2.6954052 | 1.3991125  | -5.1354221 |
| H  | -0.7359799 | 0.8725554  | -6.0562950 |
| H  | -1.1113247 | 2.6199486  | -6.0424776 |
| C  | 0.0038755  | -3.2701887 | -4.1268295 |
| H  | -1.1999443 | -1.4584133 | -3.7656972 |
| H  | -1.1385058 | -1.9864959 | -5.4735051 |
| C  | 1.2863205  | -3.3281828 | -4.9718057 |
| H  | 2.4455966  | -1.6940390 | -4.0897289 |
| H  | 2.2577934  | -1.5578314 | -5.8622051 |
| H  | -2.8636816 | 0.8147301  | -3.0300228 |
| H  | -3.6425016 | 2.3663896  | -3.3813579 |
| H  | -2.9643690 | 0.3571207  | -5.3242146 |
| H  | -3.3611259 | 2.0304563  | -5.7290092 |
| H  | 0.2451181  | -3.2690520 | -3.0591006 |
| H  | -0.6817619 | -4.0960731 | -4.3321806 |
| H  | 2.0314590  | -4.0199251 | -4.5715120 |
| H  | 1.0504583  | -3.6283232 | -5.9980429 |
| C  | 0.9305897  | 0.1304763  | -1.4146544 |
| C  | 1.3209027  | 1.3854932  | -0.6325663 |
| C  | -0.3600333 | -0.4116507 | -0.7941974 |
| C  | 2.0213545  | -0.9147994 | -1.1692457 |
| H  | 1.4448431  | 1.1800474  | 0.4621269  |
| H  | 2.2746839  | 1.8105756  | -0.9784490 |
| H  | 0.5655258  | 2.1825099  | -0.7109504 |

|   |            |            |            |
|---|------------|------------|------------|
| H | -1.1988910 | 0.2960547  | -0.8816463 |
| H | -0.6839169 | -1.3552928 | -1.2600526 |
| H | -0.2466538 | -0.6272200 | 0.2997069  |
| H | 3.0029703  | -0.5912119 | -1.5471900 |
| H | 2.1598468  | -1.1344234 | -0.0789979 |
| H | 1.7911638  | -1.8784176 | -1.6484228 |

***t*BuLi<sub>3</sub> Me<sub>3</sub>CLi(THF)<sub>3</sub>**

53

Energy = -863.2859060538

|    |            |            |            |
|----|------------|------------|------------|
| Li | -0.3642253 | 0.1130433  | -2.8471011 |
| O  | -0.1530842 | -1.8659717 | -2.6269425 |
| O  | -2.2575096 | 0.3238308  | -3.5497646 |
| O  | 0.5984019  | 0.3167082  | -4.6015314 |
| C  | 0.1908855  | -2.3850990 | -1.3230953 |
| C  | 0.3019553  | -2.8582414 | -3.5729146 |
| C  | -2.8630313 | -0.8338489 | -4.1757245 |
| C  | -3.1679197 | 0.6939454  | -2.4860659 |
| C  | 0.1704069  | 1.2495436  | -5.6212626 |
| C  | 2.0416433  | 0.3077262  | -4.6730370 |
| C  | 1.5909143  | -2.9798747 | -1.5035415 |
| H  | 0.1379998  | -1.5455303 | -0.6294721 |
| H  | -0.5423732 | -3.1542231 | -1.0399107 |
| C  | 1.6237139  | -3.4038214 | -2.9982833 |
| H  | 0.4023744  | -2.3576237 | -4.5368669 |
| H  | -0.4563943 | -3.6499872 | -3.6476299 |
| C  | -3.5282736 | -1.6331251 | -3.0350831 |
| H  | -3.6049926 | -0.4875784 | -4.9072882 |
| H  | -2.0679838 | -1.3708545 | -4.6947869 |
| C  | -3.5486660 | -0.6394247 | -1.8425952 |
| H  | -4.0408621 | 1.2001603  | -2.9227164 |
| H  | -2.6262273 | 1.3745814  | -1.8293857 |
| C  | 1.1868484  | 2.4015879  | -5.5722176 |
| H  | 0.1907130  | 0.7390246  | -6.5942551 |
| H  | -0.8535280 | 1.5352823  | -5.3788750 |
| C  | 2.4416353  | 1.7712519  | -4.9058961 |
| H  | 2.3512495  | -0.3328840 | -5.5109069 |
| H  | 2.4095610  | -0.1140975 | -3.7362313 |
| H  | 2.3482553  | -2.2168295 | -1.3058365 |
| H  | 1.7664594  | -3.8195500 | -0.8263049 |
| H  | 2.4844507  | -2.9635414 | -3.5077205 |
| H  | 1.6816477  | -4.4888459 | -3.1166178 |
| H  | -4.5359538 | -1.9473899 | -3.3196251 |
| H  | -2.9477280 | -2.5246589 | -2.7888970 |
| H  | -4.5212856 | -0.5966748 | -1.3453333 |
| H  | -2.7918405 | -0.9136406 | -1.1022273 |
| H  | 1.3981209  | 2.7845283  | -6.5738518 |
| H  | 0.8048431  | 3.2263519  | -4.9661190 |
| H  | 3.3312152  | 1.8459890  | -5.5363891 |
| H  | 2.6554901  | 2.2620838  | -3.9534214 |
| C  | 0.1884355  | 1.3099395  | -1.1505431 |

|   |            |           |            |
|---|------------|-----------|------------|
| C | 1.6752402  | 1.0925636 | -0.8662737 |
| C | 0.0257941  | 2.7631865 | -1.5994015 |
| C | -0.5444165 | 1.1637136 | 0.1815823  |
| H | 2.2997928  | 1.2401731 | -1.7599216 |
| H | 2.0680099  | 1.8031409 | -0.0916406 |
| H | 1.8869166  | 0.0807626 | -0.4885662 |
| H | 0.4057748  | 3.4911709 | -0.8347873 |
| H | 0.5761720  | 2.9758375 | -2.5278119 |
| H | -1.0264671 | 3.0316052 | -1.7817262 |
| H | -1.6241037 | 1.3588673 | 0.0960376  |
| H | -0.4362955 | 0.1570481 | 0.6144386  |
| H | -0.1595883 | 1.8778218 | 0.9563691  |

***t*Bu<sup>-</sup> Me<sub>3</sub>C<sup>-</sup> anion**

13

Energy = -157.9511652535

|   |            |            |           |
|---|------------|------------|-----------|
| C | -1.2247968 | -0.7071638 | 0.7685848 |
| C | -0.0002595 | -0.0001147 | 0.2144241 |
| H | -2.1672042 | -0.2277139 | 0.4620789 |
| H | -1.2804866 | -1.7631383 | 0.4624136 |
| H | -1.2308616 | -0.7104927 | 1.9013167 |
| C | 1.2248519  | -0.7072510 | 0.7686581 |
| C | -0.0000366 | 1.4144307  | 0.7687163 |
| H | 2.1670870  | -0.2275253 | 0.4621554 |
| H | 1.2309691  | -0.7106519 | 1.9014659 |
| H | 1.2806398  | -1.7631695 | 0.4623754 |
| H | 0.0000386  | 1.4213619  | 1.9015117 |
| H | 0.8865728  | 1.9905135  | 0.4622554 |
| H | -0.8865051 | 1.9908454  | 0.4623968 |

**THF *c*-C<sub>4</sub>H<sub>8</sub>O solvent**

13

Energy = -232.5925767060

|   |            |            |            |
|---|------------|------------|------------|
| O | -0.0232633 | 0.0049832  | -1.2561122 |
| C | 0.1576323  | 1.1732537  | -0.4153786 |
| C | -0.1579139 | -1.1731542 | -0.4183970 |
| C | 0.2209204  | -0.7343577 | 0.9965100  |
| C | -0.2236577 | 0.7364535  | 0.9980885  |
| H | 1.2097707  | 1.4880729  | -0.4643996 |
| H | -0.4714906 | 1.9757797  | -0.8128748 |
| H | -1.1996301 | -1.5196441 | -0.4643926 |
| H | 0.4936350  | -1.9547486 | -0.8222421 |
| H | -0.2712193 | -1.3359849 | 1.7655039  |
| H | 1.3048491  | -0.8031003 | 1.1415513  |
| H | -1.3078392 | 0.8069993  | 1.1408101  |
| H | 0.2688629  | 1.3359052  | 1.7686234  |

**6a**

59

Energy = -2033.901696528

|   |            |           |            |
|---|------------|-----------|------------|
| P | -0.2759893 | 0.1143798 | -0.6357018 |
|---|------------|-----------|------------|

|   |            |            |            |
|---|------------|------------|------------|
| N | -1.3931645 | -0.9875986 | 0.0851264  |
| C | -1.5730768 | -2.2845413 | -0.4526258 |
| C | -1.3653741 | -2.5261027 | -1.8177729 |
| C | -1.9273305 | -3.3533223 | 0.3856139  |
| C | -1.4670058 | -3.8188395 | -2.3300071 |
| H | -1.1336131 | -1.6982044 | -2.4794203 |
| C | -2.0517992 | -4.6362370 | -0.1382846 |
| H | -2.0930741 | -3.1705859 | 1.4427663  |
| C | -1.8107072 | -4.8809966 | -1.4944616 |
| H | -1.2911967 | -3.9884609 | -3.3884416 |
| H | -2.3228223 | -5.4555289 | 0.5217915  |
| H | -1.8970818 | -5.8870593 | -1.8934858 |
| C | -2.2427689 | -0.5321453 | 1.1437186  |
| C | -3.6322458 | -0.5329290 | 0.9764085  |
| C | -1.6827800 | -0.0514132 | 2.3303256  |
| C | -4.4519439 | -0.0483098 | 1.9935549  |
| H | -4.0577744 | -0.9082270 | 0.0505170  |
| C | -2.5059315 | 0.4521428  | 3.3365050  |
| H | -0.6045334 | -0.0694733 | 2.4557057  |
| C | -3.8915911 | 0.4539226  | 3.1719979  |
| H | -5.5298947 | -0.0466750 | 1.8588940  |
| H | -2.0622986 | 0.8384729  | 4.2492497  |
| H | -4.5333973 | 0.8430742  | 3.9568872  |
| W | 2.0635036  | -0.6644958 | -1.1567896 |
| C | 2.5306968  | -0.3401476 | 0.8191297  |
| O | 2.7792268  | -0.1627890 | 1.9354199  |
| C | 1.7050307  | -2.6471771 | -0.6886331 |
| O | 1.5743528  | -3.7599725 | -0.4133432 |
| C | 3.9841828  | -1.1352586 | -1.5748995 |
| O | 5.0903077  | -1.3927556 | -1.8150399 |
| C | 1.5090667  | -1.0155280 | -3.1103036 |
| O | 1.1832239  | -1.2176664 | -4.2011938 |
| C | 2.4468966  | 1.3093862  | -1.5914244 |
| O | 2.6604713  | 2.4207953  | -1.8269257 |
| C | -0.7591709 | 1.7525005  | -0.1480156 |
| C | -1.1428310 | 1.4736164  | -1.4044273 |
| C | -1.7654097 | 1.9814108  | -2.6026677 |
| C | -1.9351055 | 1.1337403  | -3.7116368 |
| C | -2.1812514 | 3.3238232  | -2.7002284 |
| C | -2.5158951 | 1.6079410  | -4.8837772 |
| H | -1.6033177 | 0.1025186  | -3.6442173 |
| C | -2.7535247 | 3.7964724  | -3.8763523 |
| H | -2.0398063 | 3.9923249  | -1.8574318 |
| C | -2.9271068 | 2.9403390  | -4.9687156 |
| H | -2.6447216 | 0.9426460  | -5.7321942 |
| H | -3.0663222 | 4.8342604  | -3.9443831 |
| H | -3.3781523 | 3.3126431  | -5.8837521 |
| C | -0.7529283 | 2.7359515  | 0.9139013  |
| C | 0.2691292  | 2.7195882  | 1.8778251  |
| C | -1.7782964 | 3.6915514  | 1.0184515  |
| C | 0.2760781  | 3.6484029  | 2.9130642  |

|   |            |           |           |
|---|------------|-----------|-----------|
| H | 1.0559679  | 1.9757836 | 1.8042918 |
| C | -1.7766213 | 4.6089087 | 2.0653803 |
| H | -2.5903908 | 3.6878444 | 0.2986096 |
| C | -0.7488116 | 4.5936175 | 3.0118384 |
| H | 1.0750370  | 3.6322008 | 3.6484757 |
| H | -2.5802491 | 5.3349776 | 2.1464200 |
| H | -0.7495041 | 5.3117134 | 3.8266004 |

## 6a1

59

Energy = -2033.902245424

|   |            |            |            |
|---|------------|------------|------------|
| P | -0.2666964 | 0.6391877  | 0.2419101  |
| N | -1.3623636 | -0.1463474 | 1.3355185  |
| C | -0.8643294 | -0.9099932 | 2.4099009  |
| C | -1.6068328 | -1.9597580 | 2.9746396  |
| C | 0.4028887  | -0.6133265 | 2.9408624  |
| C | -1.0738724 | -2.7044262 | 4.0248254  |
| H | -2.5928879 | -2.1931876 | 2.5878764  |
| C | 0.9320302  | -1.3753576 | 3.9786125  |
| H | 0.9664585  | 0.2283308  | 2.5498277  |
| C | 0.2006745  | -2.4308428 | 4.5266389  |
| H | -1.6623444 | -3.5142140 | 4.4475707  |
| H | 1.9177922  | -1.1328172 | 4.3655113  |
| H | 0.6122960  | -3.0228112 | 5.3382657  |
| C | -2.6761405 | -0.3943178 | 0.8024984  |
| C | -2.9045778 | -1.4930028 | -0.0335024 |
| C | -3.7016424 | 0.5156416  | 1.0661066  |
| C | -4.1600775 | -1.6729390 | -0.6131139 |
| H | -2.0988886 | -2.1947773 | -0.2265857 |
| C | -4.9549984 | 0.3337337  | 0.4806330  |
| H | -3.5027897 | 1.3645146  | 1.7125390  |
| C | -5.1842314 | -0.7568040 | -0.3602958 |
| H | -4.3355187 | -2.5221205 | -1.2667640 |
| H | -5.7492808 | 1.0480875  | 0.6756866  |
| H | -6.1589701 | -0.8932294 | -0.8191706 |
| W | 1.4900202  | -0.7191681 | -0.9478635 |
| C | 2.8794916  | -0.2356929 | 0.4909038  |
| O | 3.6583669  | 0.0342621  | 1.3026990  |
| C | 1.0279913  | -2.4384792 | 0.0981174  |
| O | 0.7819782  | -3.4216882 | 0.6510354  |
| C | 2.8955316  | -1.7281146 | -1.9922097 |
| O | 3.7044845  | -2.2997480 | -2.5975507 |
| C | 0.0681180  | -1.2059277 | -2.3579919 |
| O | -0.7255958 | -1.4854069 | -3.1508178 |
| C | 1.9194551  | 1.0123861  | -1.9752862 |
| O | 2.1496944  | 1.9913734  | -2.5447178 |
| C | -0.2480566 | 2.3989344  | 0.5493128  |
| C | -1.1156541 | 2.0545450  | -0.4145844 |
| C | -2.0291895 | 2.4891425  | -1.4429868 |
| C | -2.7491884 | 1.5292216  | -2.1759451 |
| C | -2.1999056 | 3.8534580  | -1.7466081 |

|   |            |           |            |
|---|------------|-----------|------------|
| C | -3.6253111 | 1.9222843 | -3.1814272 |
| H | -2.6223724 | 0.4786452 | -1.9365462 |
| C | -3.0736390 | 4.2410018 | -2.7571692 |
| H | -1.6354020 | 4.6021928 | -1.2010687 |
| C | -3.7912823 | 3.2783590 | -3.4743461 |
| H | -4.1814697 | 1.1726628 | -3.7364466 |
| H | -3.1962278 | 5.2950404 | -2.9884134 |
| H | -4.4758723 | 3.5857064 | -4.2595018 |
| C | 0.3488774  | 3.4558965 | 1.3276582  |
| C | 1.5393994  | 3.2067764 | 2.0343225  |
| C | -0.2377631 | 4.7334880 | 1.4071063  |
| C | 2.1395993  | 4.2121712 | 2.7851892  |
| H | 1.9938405  | 2.2226407 | 1.9750140  |
| C | 0.3588718  | 5.7324348 | 2.1698160  |
| H | -1.1695859 | 4.9298772 | 0.8871957  |
| C | 1.5502721  | 5.4772921 | 2.8557574  |
| H | 3.0637624  | 4.0111496 | 3.3186266  |
| H | -0.1048675 | 6.7125209 | 2.2313440  |
| H | 2.0149429  | 6.2609629 | 3.4466950  |

**6b**

71

Energy = -2041.149061379

|   |            |            |            |
|---|------------|------------|------------|
| P | -0.3650176 | 0.4312401  | -0.0824710 |
| N | -1.4104090 | -0.4967025 | 0.8592287  |
| W | 1.6952815  | -0.6657562 | -1.0839279 |
| C | 2.4770029  | -0.9952060 | 0.7915630  |
| O | 2.9492182  | -1.1837695 | 1.8321287  |
| C | 0.7441029  | -2.4893108 | -1.0644448 |
| O | 0.2002570  | -3.5099427 | -1.0744720 |
| C | 3.3583114  | -1.4856171 | -1.8829560 |
| O | 4.3172196  | -1.9541196 | -2.3431545 |
| C | 0.9522040  | -0.3507743 | -2.9768071 |
| O | 0.5493361  | -0.1896425 | -4.0494158 |
| C | 2.5413618  | 1.2132398  | -1.1053579 |
| O | 2.9983067  | 2.2746225  | -1.1187674 |
| C | -0.3470693 | 2.1639497  | 0.3953140  |
| C | -1.1057482 | 1.9501110  | -0.6838762 |
| C | -1.9660753 | 2.5314077  | -1.6890085 |
| C | -2.2101323 | 1.8465403  | -2.8921810 |
| C | -2.6024554 | 3.7673834  | -1.4677972 |
| C | -3.0551301 | 2.3884172  | -3.8554934 |
| H | -1.7229918 | 0.8931717  | -3.0669235 |
| C | -3.4572701 | 4.2998346  | -2.4280345 |
| H | -2.4444076 | 4.2906784  | -0.5305251 |
| C | -3.6837654 | 3.6148810  | -3.6254255 |
| H | -3.2290935 | 1.8527457  | -4.7839198 |
| H | -3.9512497 | 5.2490463  | -2.2421040 |
| H | -4.3507334 | 4.0333756  | -4.3733244 |
| C | 0.2501477  | 3.0989982  | 1.3130599  |
| C | 1.0863671  | 2.6044868  | 2.3315043  |

|   |            |            |            |
|---|------------|------------|------------|
| C | 0.0477554  | 4.4891581  | 1.2130199  |
| C | 1.6974339  | 3.4711199  | 3.2313980  |
| H | 1.2517730  | 1.5330269  | 2.3982289  |
| C | 0.6639539  | 5.3533877  | 2.1122131  |
| H | -0.5817694 | 4.8857259  | 0.4234947  |
| C | 1.4862340  | 4.8482870  | 3.1246822  |
| H | 2.3400429  | 3.0773772  | 4.0132614  |
| H | 0.5048619  | 6.4242730  | 2.0256743  |
| H | 1.9626272  | 5.5271730  | 3.8258231  |
| C | -0.8467892 | -0.9494017 | 2.1498335  |
| C | -1.4066555 | -0.1817007 | 3.3573501  |
| C | -0.9689559 | -2.4644335 | 2.3597347  |
| H | 0.2278986  | -0.7218692 | 2.0883368  |
| C | -0.6919620 | -0.6045940 | 4.6484352  |
| H | -2.4801118 | -0.3949944 | 3.4493659  |
| H | -1.3009802 | 0.8957069  | 3.1881527  |
| C | -0.2582007 | -2.8890419 | 3.6539883  |
| H | -2.0292477 | -2.7428851 | 2.4226780  |
| H | -0.5467582 | -2.9869480 | 1.4962973  |
| C | -0.7964534 | -2.1195649 | 4.8673291  |
| H | -1.1127069 | -0.0625776 | 5.5034010  |
| H | 0.3684236  | -0.3208753 | 4.5815630  |
| H | -0.3737180 | -3.9688394 | 3.8031515  |
| H | 0.8187550  | -2.6946160 | 3.5517713  |
| H | -0.2505327 | -2.4106426 | 5.7725104  |
| H | -1.8504392 | -2.3880905 | 5.0274456  |
| C | -2.8531261 | -0.6671003 | 0.5944657  |
| C | -3.7009930 | 0.5885534  | 0.8694339  |
| C | -3.0758111 | -1.1803642 | -0.8343107 |
| H | -3.1857462 | -1.4522470 | 1.2857043  |
| C | -5.1858602 | 0.3236178  | 0.5866031  |
| H | -3.3586553 | 1.4025951  | 0.2224841  |
| H | -3.5525010 | 0.9156250  | 1.9032999  |
| C | -4.5624209 | -1.4071580 | -1.1383108 |
| H | -2.6756858 | -0.4378680 | -1.5376928 |
| H | -2.5027320 | -2.1029742 | -0.9758068 |
| C | -5.3898551 | -0.1462161 | -0.8591102 |
| H | -5.7680494 | 1.2320577  | 0.7814898  |
| H | -5.5591227 | -0.4486771 | 1.2748985  |
| H | -4.6819497 | -1.7237003 | -2.1812701 |
| H | -4.9364184 | -2.2291872 | -0.5114339 |
| H | -6.4516307 | -0.3394431 | -1.0528564 |
| H | -5.0755974 | 0.6534363  | -1.5450117 |

**7b**

62

Energy = -1697.993538034

|   |            |            |            |
|---|------------|------------|------------|
| P | -0.3494869 | 0.2683852  | -0.1463386 |
| N | -1.4508855 | -0.1956356 | 1.0428575  |
| W | 1.2773771  | -1.2598679 | -1.3920104 |
| C | 2.2695035  | -1.4532224 | 0.4029897  |

O 2.8271205 -1.5560557 1.4110876  
 C 0.2120251 -2.9790740 -1.0105796  
 O -0.3418310 -3.9801159 -0.8366556  
 C 2.6501468 -2.4100936 -2.3181108  
 O 3.4493645 -3.0635903 -2.8515965  
 C 0.2155246 -1.0444397 -3.1442629  
 O -0.3800049 -0.9497543 -4.1310395  
 C 2.4392861 0.3775813 -1.8399270  
 O 3.1280962 1.2708861 -2.0986028  
 C -0.8765902 -0.6407988 2.3362335  
 C -1.6780681 -0.0922615 3.5251367  
 C -0.7127547 -2.1650646 2.4397841  
 H 0.1263961 -0.1935210 2.3801972  
 C -1.0284754 -0.4948814 4.8572248  
 H -2.7004798 -0.4919416 3.4876653  
 H -1.7512114 0.9978815 3.4407665  
 C -0.0696389 -2.5646216 3.7748838  
 H -1.6962771 -2.6455891 2.3518614  
 H -0.1057124 -2.5198265 1.6012471  
 C -0.8710781 -2.0171534 4.9624465  
 H -1.6278315 -0.1116832 5.6913523  
 H -0.0383926 -0.0233343 4.9318487  
 H 0.0120923 -3.6560581 3.8357792  
 H 0.9536032 -2.1656522 3.8141231  
 H -0.3804717 -2.2829592 5.9062528  
 H -1.8662013 -2.4841992 4.9745866  
 C -2.8332453 -0.6193025 0.7110029  
 C -3.8374491 0.5369635 0.8523239  
 C -2.9464355 -1.2589669 -0.6781735  
 H -3.1013031 -1.3885191 1.4471357  
 C -5.2710537 0.0586155 0.5862184  
 H -3.5807509 1.3191062 0.1270186  
 H -3.7499401 0.9790551 1.8498430  
 C -4.3820412 -1.7201463 -0.9672595  
 H -2.6411887 -0.5241030 -1.4369637  
 H -2.2560941 -2.1037182 -0.7509843  
 C -5.3856701 -0.5716848 -0.8073520  
 H -5.9696645 0.8972433 0.6881077  
 H -5.5528397 -0.6853313 1.3454573  
 H -4.4366625 -2.1417483 -1.9775740  
 H -4.6438012 -2.5286713 -0.2701489  
 H -6.4055238 -0.9339649 -0.9816820  
 H -5.1827397 0.1960987 -1.5677777  
 C 0.2465091 1.9214142 0.3816223  
 H 1.2576684 2.1764242 0.0761355  
 H -0.0188810 2.2455924 1.3832028  
 C -0.8338993 1.9681493 -0.6823520  
 H -1.8114318 2.2536412 -0.3033502  
 C -0.5418151 2.4443938 -2.0884800  
 C -1.7019849 2.1656148 -3.0503949  
 H 0.3715636 1.9655320 -2.4620893

H -0.3341532 3.5237917 -2.0602150  
 C -1.3956672 2.6059027 -4.4839254  
 H -1.9297443 1.0929809 -3.0335795  
 H -2.6002674 2.6806378 -2.6852026  
 H -1.1830820 3.6804955 -4.5268489  
 H -0.5211465 2.0742403 -4.8759711  
 H -2.2401522 2.4010917 -5.1501851

**7b1**

62

Energy = -1697.991747922

P -0.6289955 0.3239379 -0.1676410  
 N -1.6696497 -0.1602545 1.0731120  
 W 1.1193392 -1.0784717 -1.4064819  
 C 2.1489538 -1.1598696 0.3739377  
 O 2.7179871 -1.1957147 1.3805791  
 C 0.2846819 -2.9169519 -1.0075563  
 O -0.1084310 -3.9904182 -0.8287278  
 C 2.5739314 -2.0782562 -2.3787526  
 O 3.4189009 -2.6424984 -2.9429734  
 C -0.0426200 -0.9406429 -3.1031413  
 O -0.7157629 -0.8672375 -4.0403026  
 C 2.1197061 0.6531529 -1.8836174  
 O 2.7285627 1.5978106 -2.1611417  
 C -1.0113151 -0.4999813 2.3611496  
 C -1.7836683 0.0938215 3.5475794  
 C -0.7674533 -2.0039597 2.5545586  
 H -0.0306403 -0.0048608 2.3280128  
 C -1.0567448 -0.1878814 4.8709319  
 H -2.7887839 -0.3477615 3.5865457  
 H -1.9093593 1.1710910 3.3913652  
 C -0.0410756 -2.2783674 3.8787894  
 H -1.7304378 -2.5321767 2.5539859  
 H -0.1868807 -2.3896659 1.7096387  
 C -0.8137545 -1.6900657 5.0661361  
 H -1.6377183 0.2193010 5.7066344  
 H -0.0904055 0.3361854 4.8684903  
 H 0.1000651 -3.3576603 4.0083828  
 H 0.9605522 -1.8280180 3.8391687  
 H -0.2660856 -1.8663790 5.9994085  
 H -1.7810382 -2.2043470 5.1591521  
 C -2.9790398 -0.7980300 0.7860242  
 C -4.0384319 0.2299224 0.3658212  
 C -2.9036167 -1.9362562 -0.2398321  
 H -3.3019457 -1.2314704 1.7406694  
 C -5.4107703 -0.4360582 0.1960990  
 H -3.7426688 0.6748006 -0.5928918  
 H -4.0779415 1.0363956 1.1065381  
 C -4.2742321 -2.5965643 -0.4459344  
 H -2.5428493 -1.5292859 -1.1965026  
 H -2.1729922 -2.6781344 0.0911531

C -5.3431900 -1.5688890 -0.8360714  
H -6.1532869 0.3128216 -0.1031347  
H -5.7396300 -0.8437832 1.1628643  
H -4.1964965 -3.3803510 -1.2083911  
H -4.5739241 -3.0915772 0.4889652  
H -6.3203031 -2.0565914 -0.9325767  
H -5.0971119 -1.1451067 -1.8202583  
C -0.1746717 2.0460833 0.2695769  
H 0.8093277 2.3711344 -0.0570473  
H -0.4608295 2.3928523 1.2575906  
C -1.2630728 1.9455015 -0.7836175  
H -2.2559885 2.1721932 -0.4067858  
C -1.0011766 2.3895549 -2.2069979  
C -0.9346018 3.9185259 -2.3396803  
H -1.7901726 1.9942543 -2.8587058  
H -0.0581566 1.9583593 -2.5625490  
C -0.6421323 4.3597737 -3.7768638  
H -1.8846594 4.3519247 -2.0012028  
H -0.1571346 4.3025017 -1.6670683  
H 0.3177723 3.9563458 -4.1201330  
H -1.4196953 4.0031093 -4.4624063  
H -0.5971216 5.4512012 -3.8547454

**8b**

65

Energy = -1737.331115916

P -0.3097475 0.3573861 -0.0618823  
N -1.4597598 -0.1348724 1.0681572  
W 1.2886193 -1.1571130 -1.3661429  
C 2.2259303 -1.4941195 0.4367731  
O 2.7525425 -1.6801302 1.4496270  
C 0.1529914 -2.8545911 -1.1127656  
O -0.4401852 -3.8431744 -1.0127269  
C 2.6439033 -2.3008278 -2.3240312  
O 3.4344256 -2.9507199 -2.8747756  
C 0.2842394 -0.8108360 -3.1312224  
O -0.2777386 -0.6496658 -4.1290648  
C 2.5191890 0.4588417 -1.6908084  
O 3.2468087 1.3384501 -1.8815973  
C -0.9407328 -0.6787023 2.3470149  
C -1.7520485 -0.1670482 3.5455012  
C -0.8414669 -2.2118725 2.3639948  
H 0.0780712 -0.2776764 2.4431522  
C -1.1561441 -0.6729539 4.8674485  
H -2.7884814 -0.5206937 3.4585979  
H -1.7790407 0.9282343 3.5237867  
C -0.2482583 -2.7131368 3.6879761  
H -1.8412127 -2.6452766 2.2263414  
H -0.2286565 -2.5428642 1.5199912  
C -1.0588720 -2.2037804 4.8862237  
H -1.7634840 -0.3159508 5.7073710

H -0.1513149 -0.2458252 4.9954244  
H -0.2093214 -3.8086110 3.6867955  
H 0.7880729 -2.3573731 3.7744569  
H -0.6034410 -2.5427917 5.8241817  
H -2.0709597 -2.6312910 4.8472554  
C -2.8470925 -0.4830152 0.6741902  
C -3.8079430 0.7055090 0.8459994  
C -2.9426507 -1.0459585 -0.7490852  
H -3.1684211 -1.2765827 1.3614391  
C -5.2508346 0.3012466 0.5148461  
H -3.4982466 1.5111491 0.1686577  
H -3.7329712 1.0932392 1.8670025  
C -4.3857773 -1.4308246 -1.1043442  
H -2.5838652 -0.2868680 -1.4591579  
H -2.2851427 -1.9141587 -0.8450692  
C -5.3480919 -0.2524277 -0.9122637  
H -5.9177945 1.1621952 0.6401384  
H -5.5855137 -0.4677781 1.2261184  
H -4.4250950 -1.7959917 -2.1371285  
H -4.7014333 -2.2636958 -0.4601458  
H -6.3756836 -0.5639321 -1.1332431  
H -5.0930081 0.5442861 -1.6258004  
C 0.3450466 1.9433723 0.5893032  
H 1.3739802 2.1705417 0.3238783  
H 0.0687869 2.2136531 1.6038604  
C -0.7051556 2.1091414 -0.4922281  
H -1.6789103 2.4116114 -0.1167504  
C -0.3644746 2.6523958 -1.8623649  
C -1.4991365 2.4265152 -2.8663934  
H 0.5538642 2.1801133 -2.2315054  
H -0.1469946 3.7265166 -1.7758927  
C -1.1516814 2.8870432 -4.2848385  
H -1.7505278 1.3581681 -2.8841389  
H -2.4002019 2.9508264 -2.5187873  
C -2.2807411 2.6143602 -5.2832541  
H -0.9184807 3.9601763 -4.2712309  
H -0.2388919 2.3732177 -4.6144876  
H -2.0128446 2.9510289 -6.2905404  
H -2.5030428 1.5419821 -5.3334603  
H -3.1998785 3.1337092 -4.9866937

**8b1**

65

Energy = -1737.329552805

P -0.6657376 0.2693916 -0.1990752  
N -1.6586311 -0.3084724 1.0353469  
W 1.1642366 -1.0231617 -1.4239548  
C 2.2287279 -1.0094929 0.3380739  
O 2.8218622 -0.9916337 1.3312577  
C 0.3937749 -2.8756450 -0.9641629  
O 0.0071047 -3.9435996 -0.7423659

|   |            |            |            |
|---|------------|------------|------------|
| C | 2.6584828  | -1.9701213 | -2.3922820 |
| O | 3.5237150  | -2.5055071 | -2.9538700 |
| C | -0.0124683 | -0.9935712 | -3.1159752 |
| O | -0.6906889 | -0.9865318 | -4.0522768 |
| C | 2.0403535  | 0.7655375  | -1.9363982 |
| O | 2.5668442  | 1.7543367  | -2.2275699 |
| C | -0.9842711 | -0.5946653 | 2.3262714  |
| C | -1.8398525 | -0.1522369 | 3.5212440  |
| C | -0.5487027 | -2.0604301 | 2.4775431  |
| H | -0.0758971 | 0.0251334  | 2.3241109  |
| C | -1.0911884 | -0.3760085 | 4.8434330  |
| H | -2.7718972 | -0.7333885 | 3.5326596  |
| H | -2.1136544 | 0.9020389  | 3.4015343  |
| C | 0.1967377  | -2.2820512 | 3.8009008  |
| H | -1.4335714 | -2.7098451 | 2.4453359  |
| H | 0.0848886  | -2.3375950 | 1.6296228  |
| C | -0.6544810 | -1.8385352 | 4.9972082  |
| H | -1.7273622 | -0.0745468 | 5.6837612  |
| H | -0.2025391 | 0.2707086  | 4.8673120  |
| H | 0.4769097  | -3.3374215 | 3.8975045  |
| H | 1.1314370  | -1.7040874 | 3.7877083  |
| H | -0.0949233 | -1.9704547 | 5.9307938  |
| H | -1.5466441 | -2.4774393 | 5.0639846  |
| C | -2.9497991 | -0.9848136 | 0.7575751  |
| C | -4.1462000 | -0.0364890 | 0.9459936  |
| C | -3.0015984 | -1.6323705 | -0.6317427 |
| H | -3.0405955 | -1.7918463 | 1.4966647  |
| C | -5.4735681 | -0.7807181 | 0.7461579  |
| H | -4.0734815 | 0.7756867  | 0.2112921  |
| H | -4.1009071 | 0.4221217  | 1.9385502  |
| C | -4.3313131 | -2.3679322 | -0.8515705 |
| H | -2.8864755 | -0.8527346 | -1.3986466 |
| H | -2.1631920 | -2.3251195 | -0.7469813 |
| C | -5.5311880 | -1.4369192 | -0.6390661 |
| H | -6.3133675 | -0.0887732 | 0.8793021  |
| H | -5.5733784 | -1.5562840 | 1.5192947  |
| H | -4.3514775 | -2.7977754 | -1.8596907 |
| H | -4.3948043 | -3.2077104 | -0.1452560 |
| H | -6.4676151 | -1.9941588 | -0.7597757 |
| H | -5.5221043 | -0.6530585 | -1.4099002 |
| C | -0.4167789 | 2.0439820  | 0.1870580  |
| H | 0.5203162  | 2.4763320  | -0.1541659 |
| H | -0.7434218 | 2.3846522  | 1.1645419  |
| C | -1.4810245 | 1.7794661  | -0.8661529 |
| H | -2.4991026 | 1.8976983  | -0.5048999 |
| C | -1.2610888 | 2.2155083  | -2.2993844 |
| C | -1.4140011 | 3.7329932  | -2.4764031 |
| H | -1.9730785 | 1.6923211  | -2.9495037 |
| H | -0.2593604 | 1.9150827  | -2.6281639 |
| C | -1.1657931 | 4.1842602  | -3.9198397 |
| H | -2.4231709 | 4.0355354  | -2.1644472 |

|   |            |           |            |
|---|------------|-----------|------------|
| H | -0.7120569 | 4.2470051 | -1.8058188 |
| C | -1.3186452 | 5.6976454 | -4.1013855 |
| H | -0.1557977 | 3.8764715 | -4.2226640 |
| H | -1.8635401 | 3.6602152 | -4.5868259 |
| H | -1.1348923 | 5.9943649 | -5.1397231 |
| H | -2.3300601 | 6.0235594 | -3.8309679 |
| H | -0.6105967 | 6.2413167 | -3.4646724 |

**2m<sup>-</sup>** [W(CO)<sub>5</sub>]PMeCl<sup>-</sup>

17

Energy = -1476.015784454

|    |            |            |            |
|----|------------|------------|------------|
| P  | 1.1662412  | -1.2294617 | 0.5800005  |
| Cl | 0.7498292  | -0.1124896 | -1.2390375 |
| W  | 1.1967910  | -3.7519119 | -0.1270338 |
| C  | 2.4420833  | -3.1014789 | -1.6261321 |
| O  | 3.1504230  | -2.6795607 | -2.4417855 |
| C  | 2.8133296  | -4.0068700 | 1.1050906  |
| O  | 3.7263521  | -4.1410666 | 1.8122294  |
| C  | 1.2494453  | -5.6805743 | -0.6871545 |
| O  | 1.3034334  | -6.7983874 | -1.0296002 |
| C  | -0.0492694 | -4.1290291 | 1.4557584  |
| O  | -0.7546139 | -4.3100891 | 2.3616450  |
| C  | -0.4506028 | -3.3721096 | -1.3007233 |
| O  | -1.3860666 | -3.1540259 | -1.9505234 |
| C  | 2.9461476  | -0.6995420 | 0.7333718  |
| H  | 3.0013308  | 0.3842922  | 0.8792888  |
| H  | 3.3466560  | -1.1922386 | 1.6280108  |
| H  | 3.5597692  | -0.9819666 | -0.1272208 |

**5m** [W(CO)<sub>5</sub>]PMe

16

Energy = -1015.568645854

|   |            |            |            |
|---|------------|------------|------------|
| P | 1.1577103  | -1.4269238 | 0.7571402  |
| W | 1.1927385  | -3.6983282 | -0.0696547 |
| C | 2.4125514  | -3.0705538 | -1.6181338 |
| O | 3.1091053  | -2.6924481 | -2.4547696 |
| C | 2.9151615  | -4.0162032 | 1.0304887  |
| O | 3.8816529  | -4.1514056 | 1.6437845  |
| C | 1.1983590  | -5.6549126 | -0.7864773 |
| O | 1.2350531  | -6.7344947 | -1.1880114 |
| C | -0.0318353 | -4.2602466 | 1.5064760  |
| O | -0.7257629 | -4.5613969 | 2.3755180  |
| C | -0.5425195 | -3.2950744 | -1.1284977 |
| O | -1.5170985 | -3.0652400 | -1.6988717 |
| C | 2.8496310  | -0.6917783 | 0.7864497  |
| H | 2.7987981  | 0.3497678  | 0.4478248  |
| H | 3.1284043  | -0.6501512 | 1.8518640  |
| H | 3.6223840  | -1.2360486 | 0.2399871  |

**TS1** transition structure: H<sup>+</sup> transfer to **2a<sup>-</sup>**

71

Energy = -2693.470412842

|    |            |            |            |
|----|------------|------------|------------|
| P  | 0.4582151  | -0.3979597 | 0.2661513  |
| Cl | -0.2709012 | -0.5693896 | 2.2844283  |
| N  | 0.7220031  | -2.0023758 | -0.2182909 |
| C  | -0.3927102 | -2.8819403 | -0.4639449 |
| C  | -1.3805419 | -2.5339977 | -1.3892195 |
| C  | -0.4872442 | -4.0904194 | 0.2384637  |
| C  | -2.4575459 | -3.3927830 | -1.6073317 |
| H  | -1.3206240 | -1.5893878 | -1.9141857 |
| C  | -1.5634422 | -4.9459246 | 0.0086487  |
| H  | 0.2808823  | -4.3536440 | 0.9588774  |
| C  | -2.5539617 | -4.6013224 | -0.9151719 |
| H  | -3.2269384 | -3.1051614 | -2.3169493 |
| H  | -1.6304042 | -5.8799871 | 0.5599255  |
| H  | -3.3927833 | -5.2686592 | -1.0913187 |
| C  | 1.9916683  | -2.6353088 | 0.0128152  |
| C  | 2.6617815  | -2.4934219 | 1.2300211  |
| C  | 2.5560474  | -3.3990167 | -1.0140815 |
| C  | 3.9135037  | -3.0852115 | 1.4066279  |
| H  | 2.1952480  | -1.9344477 | 2.0338422  |
| C  | 3.7971208  | -4.0015636 | -0.8254442 |
| H  | 2.0229548  | -3.5045567 | -1.9541104 |
| C  | 4.4843647  | -3.8393849 | 0.3814869  |
| H  | 4.4346187  | -2.9624349 | 2.3516822  |
| H  | 4.2375641  | -4.5848632 | -1.6290000 |
| H  | 5.4577288  | -4.3006147 | 0.5202093  |
| W  | 2.3379602  | 1.2885253  | 0.2389833  |
| C  | 2.9527944  | 0.7142450  | 2.1197431  |
| O  | 3.3217572  | 0.4117022  | 3.1728701  |
| C  | 3.7445042  | 0.0399831  | -0.6146012 |
| O  | 4.5643158  | -0.6001569 | -1.1161365 |
| C  | 3.6987516  | 2.7822237  | 0.2676753  |
| O  | 4.4759205  | 3.6462388  | 0.2945716  |
| C  | 1.8018985  | 1.8914566  | -1.6556188 |
| O  | 1.5612355  | 2.2675364  | -2.7221832 |
| C  | 0.9202999  | 2.5403837  | 1.0509942  |
| O  | 0.1260399  | 3.2474822  | 1.5070323  |
| Li | -3.5357534 | 0.6182220  | -0.4316563 |
| O  | -3.4213075 | -0.3536032 | 1.3927026  |
| C  | -3.8946059 | 0.4134758  | 2.5049402  |
| C  | -3.9004578 | -1.7060731 | 1.3296678  |
| C  | -3.4325283 | 1.8378159  | 2.2472313  |
| H  | -3.4578150 | 0.0365975  | 3.4400605  |
| H  | -4.9897093 | 0.3488585  | 2.5808423  |
| C  | -5.1781495 | -1.7527609 | 0.5113058  |
| H  | -4.0649977 | -2.1098068 | 2.3355150  |
| H  | -3.1123962 | -2.2776767 | 0.8351098  |
| O  | -3.8604718 | 2.2820790  | 0.9466182  |
| H  | -2.3414872 | 1.8707284  | 2.2145366  |
| H  | -3.7960926 | 2.5141121  | 3.0307085  |
| O  | -4.8625396 | -1.1533652 | -0.7565414 |

|   |            |            |            |
|---|------------|------------|------------|
| H | -5.9822085 | -1.1932264 | 1.0095954  |
| H | -5.5121553 | -2.7896930 | 0.3660128  |
| C | -5.2255583 | 2.7181740  | 0.8838547  |
| C | -6.0086451 | -0.7493469 | -1.5215278 |
| C | -5.5714556 | 2.7936974  | -0.5918635 |
| H | -5.8843658 | 2.0120337  | 1.4078940  |
| H | -5.3330593 | 3.7051096  | 1.3551371  |
| C | -6.4923801 | 0.6175907  | -1.0745971 |
| H | -5.6678543 | -0.7032278 | -2.5595174 |
| H | -6.8152704 | -1.4887860 | -1.4419413 |
| O | -5.3770914 | 1.5126012  | -1.2235514 |
| H | -6.6012604 | 3.1430406  | -0.7358761 |
| H | -4.8850673 | 3.4764290  | -1.0995705 |
| H | -7.3318020 | 0.9540622  | -1.6986272 |
| H | -6.8258216 | 0.5934162  | -0.0282859 |
| O | -1.9691199 | 0.6755662  | -1.2790847 |
| C | -1.5098558 | 0.7363616  | -2.5854312 |
| H | -0.8198476 | -0.0237201 | -0.3995628 |
| H | -2.1756553 | 0.2105914  | -3.3028913 |
| H | -1.4006124 | 1.7744229  | -2.9539507 |
| H | -0.5055972 | 0.2708235  | -2.7023933 |

**TS2** transition structure of Cl/O exchange  
71

Energy = -2693.475741956

|    |            |            |            |
|----|------------|------------|------------|
| P  | -0.5210313 | 0.7596768  | -0.6464527 |
| Cl | 0.4654506  | 2.6452795  | 0.0795843  |
| N  | -2.1230952 | 1.4359653  | -0.0245903 |
| C  | -2.8206552 | 2.3098788  | -0.9042253 |
| C  | -3.3942454 | 1.7978078  | -2.0766841 |
| C  | -2.9049559 | 3.6874551  | -0.6479355 |
| C  | -4.0300938 | 2.6486233  | -2.9819992 |
| H  | -3.3527311 | 0.7285829  | -2.2603632 |
| C  | -3.5508624 | 4.5314149  | -1.5477569 |
| H  | -2.4557680 | 4.0817927  | 0.2579867  |
| C  | -4.1127850 | 4.0175779  | -2.7213943 |
| H  | -4.4731920 | 2.2373584  | -3.8850536 |
| H  | -3.6073651 | 5.5967374  | -1.3393415 |
| H  | -4.6141478 | 4.6788848  | -3.4224932 |
| C  | -2.4189449 | 1.5282006  | 1.3447340  |
| C  | -1.4586187 | 1.2403924  | 2.3328711  |
| C  | -3.7294974 | 1.8340383  | 1.7668560  |
| C  | -1.8100260 | 1.2171346  | 3.6818367  |
| H  | -0.4328297 | 1.0470469  | 2.0474089  |
| C  | -4.0652243 | 1.8274611  | 3.1157458  |
| H  | -4.4876861 | 2.0538307  | 1.0220330  |
| C  | -3.1116121 | 1.5103626  | 4.0891751  |
| H  | -1.0480445 | 0.9778289  | 4.4194322  |
| H  | -5.0863999 | 2.0587994  | 3.4085688  |
| H  | -3.3787999 | 1.4983976  | 5.1419785  |
| W  | -0.7682244 | -1.7474105 | 0.0767010  |



C 0.0937774 -1.5912721 1.9419504  
O 0.5137819 -1.5311177 3.0201007  
C -2.6046922 -1.4722188 0.9643364  
O -3.6625822 -1.4634482 1.4332363  
C -1.0729846 -3.7127834 0.3480933  
O -1.2532952 -4.8528446 0.4910630  
C -1.7420462 -1.8130955 -1.7250374  
O -2.3075971 -1.8434933 -2.7370776  
C 0.9329590 -2.3117494 -0.9422922  
O 1.7891825 -2.7683509 -1.5742562  
Li 2.6976144 0.7785627 -0.2785349  
O 3.6823454 2.6122481 0.2133078  
C 4.1463458 2.6212788 1.5734052  
C 4.6657793 3.0057276 -0.7600384  
C 3.0673795 1.9380205 2.3954448  
H 4.2895510 3.6547030 1.9160840  
H 5.1066633 2.0931534 1.6519424  
C 5.4179610 1.7852786 -1.2498738  
H 5.3525732 3.7499290 -0.3413522  
H 4.1058720 3.4588176 -1.5828717  
O 2.7906365 0.6252349 1.8688624  
H 2.1274909 2.4860735 2.3111394  
H 3.3647970 1.8755701 3.4489205  
O 4.4200117 0.8892361 -1.7692906  
H 5.9682282 1.3127896 -0.4255436  
H 6.1330675 2.0532294 -2.0393775  
C 3.7481359 -0.3667954 2.2837101  
C 4.8866659 -0.4565417 -1.9705421  
C 3.6062487 -1.5306924 1.3239521  
H 4.7642651 0.0458998 2.2368737  
H 3.5402258 -0.6781607 3.3155978  
C 4.9764381 -1.1995540 -0.6495752  
H 4.1360310 -0.9277448 -2.6096674  
H 5.8551866 -0.4610952 -2.4856178  
O 3.6982474 -1.0367499 -0.0230659  
H 4.3697740 -2.2916232 1.5161235  
H 2.6191905 -1.9885605 1.4118069  
H 5.1812219 -2.2633716 -0.8277580  
H 5.7699410 -0.7949954 -0.0062203  
O 1.0938365 0.4664180 -1.4585530  
C 1.3138631 1.1502303 -2.6943123  
H -1.0054348 1.1071302 -1.9174946  
H 1.5717275 2.2046577 -2.5253903  
H 2.1362039 0.6551717 -3.2175422  
H 0.4132343 1.1035705 -3.3232350

TS3a.xyz

47

Energy = -1725.640424683

**TS3** : TS of **5a** trapping with 3MeOH

53

Energy = -1841.466770942

P -0.6229708 0.7125796 -0.1970088  
N 0.6301608 1.8913598 -0.0682393  
W 0.1106791 -1.6768091 0.3596249  
C 1.9621351 1.6821898 -0.5232738  
C 0.2947451 3.1735730 0.4770280  
C 0.3209284 -2.0542009 -1.6531602  
C 2.1460897 -1.3365656 0.5456993  
C 0.5039316 -3.5850976 0.8963629  
C -0.0969891 -1.0236606 2.2939801  
C -1.8656842 -2.1944609 0.3331079  
C 2.2100184 0.8945462 -1.6561166  
C 3.0432029 2.2399327 0.1753714  
C -0.4432282 3.2636161 1.6631016  
C 0.6808244 4.3464429 -0.1846528  
O 0.4416893 -2.2225118 -2.7918998  
O 3.2846118 -1.2606275 0.7277142  
O 0.7229548 -4.6884576 1.1971811  
O -0.2190912 -0.6048351 3.3681812  
O -2.9773631 -2.5340217 0.3652049  
C 3.5197063 0.6582344 -2.0724943  
H 1.3764860 0.4670616 -2.2022387  
C 4.3466815 2.0064031 -0.2532165  
H 2.8556549 2.8458670 1.0563014  
C -0.8205892 4.5107864 2.1617373  
H -0.7104614 2.3534276 2.1918717  
C 0.3123820 5.5900169 0.3251267  
H 1.2643679 4.2775700 -1.0977432  
C 4.5941599 1.2117973 -1.3767551  
H 3.6957698 0.0397354 -2.9482126  
H 5.1751555 2.4361474 0.3031931  
C -0.4472064 5.6791180 1.4951111  
H -1.3935796 4.5673116 3.0830823  
H 0.6107648 6.4924570 -0.2012577  
H 5.6133449 1.0274118 -1.7032390  
H -0.7363410 6.6497301 1.8872252  
H -3.6806628 0.9389195 -0.8803682  
O -3.5282950 0.5538153 -1.9581659  
C -4.2476628 -0.6648823 -2.3228907  
H -5.3079519 -0.4528116 -2.1929422  
H -4.0292839 -0.8719146 -3.3702523  
H -3.9391354 -1.4947060 -1.6864277  
H -2.4903267 0.4628886 -2.0206286  
O -0.9969665 0.7549255 -1.9439314  
C -0.9346480 2.0708999 -2.5520032  
H 0.1050908 2.4011087 -2.6074158  
H -1.3470262 1.9733843 -3.5581763  
H -1.5152856 2.8001707 -1.9739032  
O -3.5644182 1.4086241 0.3218082  
C -3.9535542 2.8056587 0.4504177

|   |            |           |            |
|---|------------|-----------|------------|
| H | -2.5274906 | 1.3306952 | 0.4020550  |
| H | -3.4129138 | 3.4250222 | -0.2712849 |
| H | -5.0261894 | 2.8568398 | 0.2645473  |
| H | -3.7314167 | 3.1358298 | 1.4661240  |

**TS4** : TS of **5a** trapping with tolane PhCCPh  
59

Energy = -2033.841305067

|   |            |            |            |
|---|------------|------------|------------|
| P | 0.3382083  | -0.1228510 | 0.4429653  |
| N | -0.9392830 | -0.0288362 | 1.5560737  |
| C | -0.6970509 | -0.0909767 | 2.9764612  |
| C | -1.7303831 | -0.4922021 | 3.8361431  |
| C | 0.5580253  | 0.2174363  | 3.5124487  |
| C | -1.5002464 | -0.5880211 | 5.2080209  |
| H | -2.7079727 | -0.7350434 | 3.4354218  |
| C | 0.7780671  | 0.1173345  | 4.8843654  |
| H | 1.3605888  | 0.5306448  | 2.8588304  |
| C | -0.2472179 | -0.2849098 | 5.7426794  |
| H | -2.3101774 | -0.9057383 | 5.8584513  |
| H | 1.7583671  | 0.3666383  | 5.2809300  |
| H | -0.0734574 | -0.3570951 | 6.8121069  |
| C | -2.3219158 | 0.1996514  | 1.1974658  |
| C | -3.1034368 | -0.8348568 | 0.6853412  |
| C | -2.8830384 | 1.4566916  | 1.4373131  |
| C | -4.4429272 | -0.5998011 | 0.3726866  |
| H | -2.6723040 | -1.8205814 | 0.5626110  |
| C | -4.2195184 | 1.6882604  | 1.1176045  |
| H | -2.2688778 | 2.2432863  | 1.8649895  |
| C | -5.0002124 | 0.6621203  | 0.5787730  |
| H | -5.0487003 | -1.4061129 | -0.0296737 |
| H | -4.6501363 | 2.6703129  | 1.2892667  |
| H | -6.0412675 | 0.8446495  | 0.3299278  |
| W | -0.1744307 | -0.7779740 | -1.9521898 |
| C | 1.7282575  | -1.5407578 | -1.8124871 |
| O | 2.8038271  | -1.9644454 | -1.7611532 |
| C | -0.9299769 | -2.5312820 | -1.1923017 |
| O | -1.3237354 | -3.5483437 | -0.8032438 |
| C | -0.3090818 | -1.6065985 | -3.7930413 |
| O | -0.3870394 | -2.0916175 | -4.8454476 |
| C | -2.0653210 | 0.0189192  | -2.2238865 |
| O | -3.1050924 | 0.4509681  | -2.4808800 |
| C | 0.6750680  | 0.8971599  | -2.8185840 |
| O | 1.1918628  | 1.7724133  | -3.3653901 |
| C | 1.6673972  | 1.9506751  | 0.6400671  |
| C | 0.7800412  | 2.5135878  | -0.0101250 |
| C | -0.0425050 | 3.3350894  | -0.8278184 |
| C | -1.3888604 | 3.0357156  | -1.0905941 |
| C | 0.5333463  | 4.4867783  | -1.4072248 |
| C | -2.1450799 | 3.8644830  | -1.9123783 |
| H | -1.8254569 | 2.1497329  | -0.6502493 |
| C | -0.2322077 | 5.3105161  | -2.2248296 |

|   |            |            |            |
|---|------------|------------|------------|
| H | 1.5762029  | 4.7162866  | -1.2140678 |
| C | -1.5717426 | 5.0028868  | -2.4820861 |
| H | -3.1831844 | 3.6159893  | -2.1116345 |
| H | 0.2199386  | 6.1924752  | -2.6687881 |
| H | -2.1632660 | 5.6467518  | -3.1261769 |
| C | 2.8364782  | 1.7444468  | 1.4434359  |
| C | 3.5825320  | 0.5544746  | 1.3858714  |
| C | 3.2562875  | 2.7826762  | 2.2989430  |
| C | 4.7223115  | 0.4066921  | 2.1703597  |
| H | 3.2474153  | -0.2490941 | 0.7395765  |
| C | 4.3948190  | 2.6226467  | 3.0829768  |
| H | 2.6775288  | 3.6996411  | 2.3459738  |
| C | 5.1299980  | 1.4359607  | 3.0227281  |
| H | 5.2926096  | -0.5160123 | 2.1192800  |
| H | 4.7057764  | 3.4245677  | 3.7460044  |
| H | 6.0157683  | 1.3132141  | 3.6389016  |

**TS5** : TS of **5a** trapping with C<sub>2</sub>H<sub>4</sub>  
41

Energy = -1572.688589670

|   |            |            |            |
|---|------------|------------|------------|
| P | 1.1289683  | 0.0884598  | 0.7132354  |
| N | 0.1007969  | -0.1008727 | 2.0394683  |
| C | 0.6995213  | -0.2219002 | 3.3448341  |
| C | 0.1708753  | 0.5043460  | 4.4187367  |
| C | 1.8214704  | -1.0356547 | 3.5323095  |
| C | 0.7761359  | 0.4238100  | 5.6717418  |
| H | -0.7032281 | 1.1296999  | 4.2675176  |
| C | 2.4234548  | -1.1056336 | 4.7876340  |
| H | 2.2073710  | -1.6122537 | 2.6974651  |
| C | 1.9051713  | -0.3766690 | 5.8606016  |
| H | 0.3659122  | 0.9941475  | 6.4999981  |
| H | 3.2905016  | -1.7441694 | 4.9289301  |
| H | 2.3727375  | -0.4384736 | 6.8386912  |
| C | -1.3382475 | -0.0549445 | 2.0183708  |
| C | -2.0557929 | -1.1051869 | 2.5986915  |
| C | -2.0090958 | 1.0198880  | 1.4376039  |
| C | -3.4479629 | -1.0839785 | 2.5717859  |
| H | -1.5214987 | -1.9326281 | 3.0553452  |
| C | -3.4033158 | 1.0358304  | 1.4127088  |
| H | -1.4378509 | 1.8369404  | 1.0148624  |
| C | -4.1258127 | -0.0174270 | 1.9747039  |
| H | -4.0045753 | -1.9076082 | 3.0090383  |
| H | -3.9214598 | 1.8738347  | 0.9561322  |
| H | -5.2113102 | -0.0080691 | 1.9495990  |
| W | 0.1200900  | -0.1234578 | -1.5941692 |
| C | 1.1709101  | -1.8970226 | -1.6193270 |
| O | 1.7548260  | -2.8945671 | -1.6493673 |
| C | -1.5651588 | -1.1552848 | -0.9840353 |
| O | -2.5104574 | -1.7587795 | -0.7118610 |
| C | -0.4123819 | -0.4558058 | -3.5226726 |
| O | -0.7125850 | -0.6450707 | -4.6277924 |

|   |            |           |            |
|---|------------|-----------|------------|
| C | -0.9440292 | 1.6416288 | -1.5808897 |
| O | -1.5372731 | 2.6341391 | -1.5905687 |
| C | 1.7923811  | 0.8922323 | -2.2220373 |
| O | 2.7328190  | 1.4660799 | -2.5780464 |
| C | 1.2280420  | 2.9024345 | 0.7115782  |
| C | 2.2266780  | 2.2289620 | 1.3352745  |
| H | 3.1703305  | 2.0307651 | 0.8370749  |
| H | 2.1899185  | 2.0145276 | 2.3999362  |
| H | 1.3057039  | 3.1969513 | -0.3293744 |
| H | 0.3173828  | 3.1759867 | 1.2347032  |

**TSh** : TS of hydride transfer from *t*BuLic to **5a**  
77

Energy = -2275.270449600

|    |            |            |            |
|----|------------|------------|------------|
| Li | -0.0867280 | -0.3925070 | -4.4128260 |
| O  | 1.9563720  | -0.0607220 | -4.7811820 |
| O  | -1.4403750 | -1.8098880 | -5.1427270 |
| O  | -0.2141140 | 0.2890890  | -6.3891900 |
| C  | 2.7482000  | -1.0226610 | -4.0533210 |
| C  | 2.1796300  | -0.0621630 | -6.2034670 |
| C  | -1.8853330 | -1.3782280 | -6.4453760 |
| C  | -0.8380810 | -3.1201510 | -5.1272150 |
| C  | 1.0759560  | 0.7916050  | -6.7975140 |
| C  | -0.7303070 | -0.7700820 | -7.2185080 |
| H  | 3.7624490  | -1.0790310 | -4.4640020 |
| H  | 2.7924020  | -0.6478230 | -3.0283640 |
| H  | 3.1648410  | 0.3640410  | -6.4316170 |
| H  | 2.1438140  | -1.0874080 | -6.5953370 |
| H  | -2.6510140 | -0.6217370 | -6.2555310 |
| H  | -2.3306820 | -2.2123350 | -6.9984650 |
| H  | -1.6096680 | -3.8883160 | -5.2611590 |
| H  | -0.1061390 | -3.2118850 | -5.9410980 |
| H  | 1.1312610  | 1.8082620  | -6.4010230 |
| H  | 1.1506800  | 0.8251810  | -7.8901050 |
| H  | -1.0765860 | -0.3625850 | -8.1767170 |
| H  | 0.0521250  | -1.5146020 | -7.4173560 |
| O  | 0.7448830  | -2.1611560 | -3.5705610 |
| C  | -0.1677540 | -3.2565010 | -3.7737310 |
| H  | 0.3516160  | -4.2173190 | -3.6897670 |
| H  | -0.9058770 | -3.1775860 | -2.9718650 |
| C  | 2.0726200  | -2.3804860 | -4.0775320 |
| H  | 2.0324460  | -2.7902260 | -5.0959070 |
| H  | 2.6097610  | -3.0904190 | -3.4357710 |
| C  | -0.9244430 | -0.0362920 | -1.9259050 |
| C  | -1.0091560 | 0.9997910  | -2.9414020 |
| H  | -1.5583150 | -0.9059140 | -2.1301840 |
| H  | 0.0897610  | -0.3640730 | -1.6874010 |
| H  | -1.3498500 | 0.3350170  | -0.8888580 |
| C  | -0.0157730 | 2.1290770  | -2.9117370 |
| C  | -2.3909450 | 1.3705230  | -3.4078080 |
| H  | -0.0160580 | 2.6842890  | -3.8590940 |

|   |            |            |            |
|---|------------|------------|------------|
| H | -0.2541960 | 2.8698390  | -2.1208240 |
| H | 1.0064520  | 1.7788690  | -2.7266140 |
| H | -2.8998460 | 2.0140580  | -2.6613610 |
| H | -2.3679710 | 1.9361370  | -4.3482030 |
| H | -3.0235810 | 0.4858270  | -3.5510260 |
| P | -1.3170840 | 0.5127640  | 1.2166470  |
| N | -0.5681640 | 2.0823890  | 1.1063780  |
| C | -1.2693450 | 3.1837590  | 0.5567900  |
| C | -2.6745780 | 3.1743650  | 0.4564170  |
| C | -0.5699070 | 4.2917490  | 0.0390240  |
| C | -3.3483040 | 4.2428370  | -0.1245910 |
| H | -3.2224190 | 2.3216480  | 0.8429870  |
| C | -1.2601170 | 5.3586480  | -0.5376880 |
| H | 0.5119630  | 4.3219340  | 0.0959110  |
| C | -2.6511890 | 5.3477740  | -0.6252790 |
| H | -4.4334560 | 4.2132980  | -0.1812630 |
| H | -0.6943880 | 6.2013470  | -0.9266310 |
| H | -3.1842600 | 6.1787210  | -1.0775320 |
| C | 0.8193900  | 2.3090330  | 1.4019190  |
| C | 1.8129610  | 1.8745220  | 0.5228500  |
| C | 1.1683540  | 3.0066300  | 2.5610050  |
| C | 3.1550820  | 2.1122340  | 0.8153500  |
| H | 1.5202570  | 1.3575560  | -0.3832550 |
| C | 2.5110990  | 3.2509150  | 2.8469540  |
| H | 0.3846200  | 3.3457650  | 3.2320510  |
| C | 3.5081390  | 2.8015060  | 1.9781300  |
| H | 3.9250610  | 1.7617070  | 0.1333700  |
| H | 2.7789850  | 3.7822120  | 3.7560290  |
| H | 4.5541250  | 2.9849890  | 2.2068200  |
| W | 0.2278300  | -1.4469770 | 1.8741690  |
| C | 1.6737390  | -1.2442240 | 0.4247800  |
| O | 2.5155700  | -1.2327130 | -0.3756880 |
| C | 1.3671770  | -0.3721390 | 3.2188340  |
| O | 2.0158050  | 0.1702010  | 4.0090320  |
| C | 1.1587260  | -3.1456820 | 2.4234760  |
| O | 1.6977130  | -4.1342180 | 2.7370040  |
| C | -1.1820310 | -1.7724000 | 3.3413470  |
| O | -1.9613180 | -1.9897730 | 4.1705500  |
| C | -0.9227240 | -2.4826980 | 0.5265020  |
| O | -1.5671240 | -3.0771060 | -0.2354230 |

**TSn2** : TS of **5a** trapping with 2 MeNH<sub>2</sub>  
49

Energy = -1685.923504682

|   |            |            |            |
|---|------------|------------|------------|
| P | -1.1411998 | 0.4579983  | 0.0388674  |
| N | -0.3787198 | 2.0249761  | -0.1595579 |
| W | 0.5759327  | -1.5107018 | -0.0198291 |
| C | 0.7521542  | 2.3013483  | -0.9687936 |
| C | -0.8764557 | 3.0930640  | 0.6530981  |
| C | 0.2902743  | -1.6626329 | -2.0361898 |
| C | 2.3121840  | -0.4107756 | -0.3116673 |

|                                                                 |            |            |            |   |            |            |            |
|-----------------------------------------------------------------|------------|------------|------------|---|------------|------------|------------|
| C                                                               | 1.7697753  | -3.1298423 | 0.0921094  | C | 0.1380625  | -1.9407785 | -1.4175361 |
| C                                                               | 0.7151699  | -1.0658497 | 1.9847879  | C | 2.1261798  | -1.2812495 | 0.6268538  |
| C                                                               | -0.9957794 | -2.7436568 | 0.3707256  | C | 0.4164509  | -3.3675800 | 1.2236975  |
| C                                                               | 0.9158819  | 1.6941368  | -2.2222687 | C | 0.0164081  | -0.6339677 | 2.4395714  |
| C                                                               | 1.7533113  | 3.1771565  | -0.5137164 | C | -1.9164014 | -1.9652424 | 0.7405318  |
| C                                                               | -1.1586460 | 2.8955605  | 2.0103314  | C | 2.3034191  | 0.9806459  | -1.5456069 |
| C                                                               | -1.1034983 | 4.3550670  | 0.0847745  | C | 3.0716582  | 2.2349387  | 0.3681895  |
| O                                                               | 0.0816363  | -1.6900579 | -3.1807869 | C | -0.4928902 | 3.5765860  | 1.4917309  |
| O                                                               | 3.3474037  | 0.0888732  | -0.4244730 | C | 0.9550936  | 4.4766060  | -0.2208032 |
| O                                                               | 2.4482564  | -4.0766462 | 0.1430986  | O | 0.1796653  | -2.0854823 | -2.5717963 |
| O                                                               | 0.7628257  | -0.7716957 | 3.1040929  | O | 3.2758283  | -1.3040049 | 0.7465567  |
| O                                                               | -1.8702341 | -3.4761475 | 0.6147819  | O | 0.6103111  | -4.4585567 | 1.5851530  |
| C                                                               | 2.0527520  | 1.9394581  | -2.9909439 | O | -0.0132974 | -0.0845575 | 3.4594321  |
| H                                                               | 0.1505076  | 1.0327392  | -2.6076692 | O | -3.0168973 | -2.3026665 | 0.9015315  |
| C                                                               | 2.8818241  | 3.4253668  | -1.2886809 | C | 3.6243851  | 0.6901478  | -1.8844775 |
| H                                                               | 1.6441116  | 3.6504638  | 0.4568682  | H | 1.4989176  | 0.6006415  | -2.1634374 |
| C                                                               | -1.6787550 | 3.9372833  | 2.7794098  | C | 4.3883467  | 1.9474088  | 0.0230112  |
| H                                                               | -0.9694334 | 1.9237125  | 2.4552810  | H | 2.8533920  | 2.8291606  | 1.2501073  |
| C                                                               | -1.6098141 | 5.3959021  | 0.8602050  | C | -0.8026460 | 4.8720116  | 1.9044993  |
| H                                                               | -0.8777681 | 4.5129936  | -0.9658351 | H | -0.9260614 | 2.7196306  | 1.9968602  |
| C                                                               | 3.0440846  | 2.8059722  | -2.5316551 | C | 0.6530443  | 5.7682529  | 0.2060396  |
| H                                                               | 2.1562260  | 1.4511504  | -3.9561093 | H | 1.6380589  | 4.3212407  | -1.0505654 |
| H                                                               | 3.6492151  | 4.0954273  | -0.9102011 | C | 4.6749031  | 1.1730250  | -1.1055049 |
| C                                                               | -1.9063163 | 5.1922998  | 2.2110543  | H | 3.8279187  | 0.0841833  | -2.7629168 |
| H                                                               | -1.8915632 | 3.7688112  | 3.8316818  | H | 5.1960921  | 2.3184545  | 0.6480533  |
| H                                                               | -1.7838584 | 6.3667080  | 0.4037045  | C | -0.2323765 | 5.9759028  | 1.2669718  |
| H                                                               | 3.9297645  | 2.9966160  | -3.1303415 | H | -1.4813199 | 5.0161613  | 2.7408867  |
| H                                                               | -2.3047907 | 6.0035462  | 2.8134177  | H | 1.1043202  | 6.6163084  | -0.3021579 |
| H                                                               | -2.9634698 | -0.7543090 | -1.3429248 | H | 5.7036343  | 0.9460322  | -1.3687557 |
| N                                                               | -3.7572718 | -1.7332790 | -1.2662582 | H | -0.4696317 | 6.9836397  | 1.5952892  |
| C                                                               | -3.5185394 | -2.6851720 | -2.3856255 | H | -3.9286146 | 0.2650409  | -1.1131184 |
| H                                                               | -2.4856548 | -3.0304702 | -2.3323617 | N | -3.5637644 | 0.0949808  | -2.0810214 |
| H                                                               | -4.1942596 | -3.5396758 | -2.3237126 | C | -3.7084226 | -1.3197513 | -2.4947986 |
| H                                                               | -3.6748606 | -2.1595723 | -3.3286209 | H | -4.7479289 | -1.6560584 | -2.4389043 |
| H                                                               | -4.7217295 | -1.3988238 | -1.2775217 | H | -3.3491250 | -1.4354933 | -3.5198659 |
| N                                                               | -2.1420973 | 0.3263734  | -1.4896219 | H | -3.0996960 | -1.9431668 | -1.8383200 |
| C                                                               | -3.0152876 | 1.5039025  | -1.7201689 | H | -2.2636164 | 0.4818114  | -2.0127677 |
| H                                                               | -2.4244750 | 2.3949361  | -1.9478312 | N | -1.0776473 | 0.9181220  | -1.9140220 |
| H                                                               | -3.6974137 | 1.3004609  | -2.5516972 | C | -1.0928698 | 2.2818413  | -2.5016280 |
| H                                                               | -3.5887878 | 1.6882353  | -0.8083067 | H | -0.0885367 | 2.7097892  | -2.5235284 |
| H                                                               | -3.6202330 | -2.1995661 | -0.3673662 | H | -1.4937690 | 2.2353410  | -3.5179893 |
| H                                                               | -1.5801299 | 0.1579996  | -2.3269074 | H | -1.7307742 | 2.9148038  | -1.8799461 |
| <b>TSn3</b> : TS of <b>5a</b> trapping with 3 MeNH <sub>2</sub> |            |            |            | N | -4.0714765 | 0.9245479  | 0.6745065  |
| 56                                                              |            |            |            | C | -4.7266101 | 2.2374906  | 0.8265807  |
| Energy = -1781.855768329                                        |            |            |            | H | -3.0595212 | 1.0320260  | 0.8138378  |
| P                                                               | -0.6535864 | 0.9067880  | -0.1080057 | H | -4.3050329 | 2.9280669  | 0.0896429  |
| N                                                               | 0.6678636  | 2.0434954  | -0.0467496 | H | -5.7969475 | 2.1354325  | 0.6246669  |
| W                                                               | 0.0673945  | -1.4917906 | 0.5727017  | H | -4.6013590 | 2.6840238  | 1.8231047  |
| C                                                               | 2.0096296  | 1.7561178  | -0.4159957 | H | -0.4765399 | 0.3111675  | -2.4758210 |
| C                                                               | 0.3805853  | 3.3666022  | 0.4164350  | H | -4.0882271 | 0.7000782  | -2.7129320 |
|                                                                 |            |            |            | H | -4.4039957 | 0.2777438  | 1.3885874  |

**TSp** : TS of H<sup>+</sup> transfer from *t*BuCl

79

Energy = -3195.860208485

|    |            |            |            |
|----|------------|------------|------------|
| Cl | 4.3149087  | 3.0359829  | 0.7843620  |
| Li | 5.0410615  | 1.0633210  | -0.0229304 |
| O  | 3.6045588  | -0.3687515 | -0.8019500 |
| O  | 7.1634391  | 0.8846044  | 0.0677256  |
| O  | 5.2454876  | -0.5842215 | 1.3555935  |
| C  | 3.5785987  | -0.2482209 | -2.2386559 |
| C  | 3.8980683  | -1.6942026 | -0.3257791 |
| C  | 7.5179365  | 0.0417476  | 1.1811189  |
| C  | 7.6759762  | 0.4412675  | -1.2016208 |
| C  | 4.1953835  | -1.5491283 | 1.1542772  |
| C  | 6.5712449  | -1.1393691 | 1.2702594  |
| H  | 3.0952194  | -1.1202492 | -2.6913968 |
| H  | 2.9794029  | 0.6422684  | -2.4438287 |
| H  | 3.0353336  | -2.3536357 | -0.4895540 |
| H  | 4.7596105  | -2.1113597 | -0.8632155 |
| H  | 7.4142845  | 0.6736510  | 2.0666307  |
| H  | 8.5573463  | -0.2963516 | 1.0973564  |
| H  | 8.7578931  | 0.6200530  | -1.2555313 |
| H  | 7.4929164  | -0.6334294 | -1.3355514 |
| H  | 3.3234058  | -1.1531633 | 1.6783037  |
| H  | 4.4648213  | -2.5152684 | 1.5958372  |
| H  | 6.7857969  | -1.7403385 | 2.1635137  |
| H  | 6.6568606  | -1.7861408 | 0.3866604  |
| O  | 5.5191526  | 1.0899788  | -2.1017198 |
| C  | 6.9436970  | 1.2563693  | -2.2504833 |
| H  | 7.2637110  | 0.9751282  | -3.2602391 |
| H  | 7.1310461  | 2.3218205  | -2.0957834 |
| C  | 4.9852705  | -0.0643613 | -2.7737808 |
| H  | 5.6056434  | -0.9477114 | -2.5703452 |
| H  | 4.9662816  | 0.1046737  | -3.8583677 |
| C  | 1.2362127  | 1.7509589  | 0.2794421  |
| C  | 1.5482171  | 2.4774362  | 1.4423028  |
| H  | 1.1799182  | 2.3395245  | -0.6360451 |
| H  | 1.7533913  | 0.8006264  | 0.1528605  |
| H  | 0.0496750  | 1.3817077  | 0.3949576  |
| C  | 1.9791314  | 1.7758903  | 2.6861525  |
| C  | 1.1464187  | 3.9089277  | 1.5534951  |
| H  | 2.5943897  | 2.4281388  | 3.3084949  |
| H  | 1.0815263  | 1.5064035  | 3.2628537  |
| H  | 2.5279767  | 0.8602806  | 2.4634609  |
| H  | 0.1298582  | 3.9473875  | 1.9757881  |
| H  | 1.8056091  | 4.4527492  | 2.2336525  |
| H  | 1.1242651  | 4.4010914  | 0.5793104  |
| P  | -1.6308583 | 0.4680646  | 0.5389917  |
| Cl | -1.7572888 | 1.1892988  | 2.6022848  |
| N  | -2.8921933 | 1.2932163  | -0.2510551 |
| C  | -2.6306089 | 2.6395752  | -0.6799512 |

|   |            |            |            |
|---|------------|------------|------------|
| C | -1.5604975 | 2.8967848  | -1.5419806 |
| C | -3.4233117 | 3.6947692  | -0.2157691 |
| C | -1.2646412 | 4.2074558  | -1.9143141 |
| H | -0.9759164 | 2.0640557  | -1.9213109 |
| C | -3.1303018 | 5.0018751  | -0.6018666 |
| H | -4.2556610 | 3.4859470  | 0.4491336  |
| C | -2.0465819 | 5.2646597  | -1.4440764 |
| H | -0.4315960 | 4.4008565  | -2.5842966 |
| H | -3.7437193 | 5.8188752  | -0.2325018 |
| H | -1.8180520 | 6.2849818  | -1.7373547 |
| C | -4.2497554 | 0.8443382  | -0.2726333 |
| C | -4.8148985 | 0.2158444  | 0.8404868  |
| C | -5.0082658 | 1.0167587  | -1.4373051 |
| C | -6.1200589 | -0.2723150 | 0.7756157  |
| H | -4.2352945 | 0.1289482  | 1.7525952  |
| C | -6.3154537 | 0.5403983  | -1.4892383 |
| H | -4.5644148 | 1.5111136  | -2.2962108 |
| C | -6.8744057 | -0.1149336 | -0.3876445 |
| H | -6.5489440 | -0.7657611 | 1.6432218  |
| H | -6.8950143 | 0.6675086  | -2.3993262 |
| H | -7.8909901 | -0.4939367 | -0.4360507 |
| W | -1.6104893 | -2.0687323 | 0.4803563  |
| C | -2.8764047 | -2.2127958 | 2.1050289  |
| O | -3.5788825 | -2.2956875 | 3.0182398  |
| C | -3.2235586 | -2.2083659 | -0.8066742 |
| O | -4.1044701 | -2.3383287 | -1.5414160 |
| C | -1.3882400 | -4.0750591 | 0.4069054  |
| O | -1.2586572 | -5.2307012 | 0.3688839  |
| C | -0.3602439 | -1.8584156 | -1.1339742 |
| O | 0.3513532  | -1.7401356 | -2.0417481 |
| C | -0.0122414 | -1.9285137 | 1.7583457  |
| O | 0.8934459  | -1.8613244 | 2.4789171  |

**Table S3.** The TPSS-D3/def2-TZVP + CPCM optimized atomic Cartesian coordinates (in Å) in THF solution. Each structure is labeled by the specific name (See also **Table S1**), followed by the number of atoms, the total energy (in hartrees), and the detailed atomic coordinates (in double-column text list). Ph: phenyl; Cy: cyclohexyl; <sup>t</sup>Bu: CMe<sub>3</sub>; Anth: anthracenyl; Me: CH<sub>3</sub>.

|                                          |   |            |           |           |  |
|------------------------------------------|---|------------|-----------|-----------|--|
|                                          | H | -1,3317686 | 3,3697384 | 1,2014192 |  |
|                                          | H | -2,2670879 | 2,6015025 | 2,5012212 |  |
| <b>2-Me<sup>-</sup></b>                  |   |            |           |           |  |
| [W(CO) <sub>5</sub> ]PClMe               |   |            |           |           |  |
| 17                                       |   |            |           |           |  |
| Energy = -1476.01877763869               | C | 1,0241179  | 1,9779915 | 1,5813165 |  |
| P -1,7966572                             | H | 1,6838995  | 1,1068182 | 1,5573441 |  |
| 2,1661176                                | H | 0,9932866  | 2,4122661 | 0,5768213 |  |
| 0,7609881                                | H | 1,4582860  | 2,7220351 | 2,2642280 |  |
| Cl -1,1785783                            |   |            |           |           |  |
| 1,2023492                                |   |            |           |           |  |
| 1,0935170                                |   |            |           |           |  |
| C 1,1063694                              |   |            |           |           |  |
| 0,5949706                                |   |            |           |           |  |
| 4,0062284                                |   |            |           |           |  |
| O 1,8710301                              |   |            |           |           |  |
| 0,2148964                                |   |            |           |           |  |
| 4,8066333                                |   |            |           |           |  |
| C 1,2995126                              |   |            |           |           |  |
| 1,7394644                                |   |            |           |           |  |
| 1,2500184                                |   |            |           |           |  |
| O 2,0857417                              |   |            |           |           |  |
| 2,0369626                                |   |            |           |           |  |
| 0,4510014                                |   |            |           |           |  |
| C -0,0809099                             |   |            |           |           |  |
| 3,1735484                                |   |            |           |           |  |
| 3,3596577                                |   |            |           |           |  |
| O -0,0443282                             |   |            |           |           |  |
| 4,2562378                                |   |            |           |           |  |
| 3,7808500                                |   |            |           |           |  |
| C -1,8122654                             |   |            |           |           |  |
| 0,9057504                                |   |            |           |           |  |
| 3,7788614                                |   |            |           |           |  |
| O -2,7614504                             |   |            |           |           |  |
| 0,7145307                                |   |            |           |           |  |
| 4,4216648                                |   |            |           |           |  |
| C -0,3779159                             |   |            |           |           |  |
| -0,6003781                               |   |            |           |           |  |
| 1,7730633                                |   |            |           |           |  |
| O -0,5117776                             |   |            |           |           |  |
| -1,6515844                               |   |            |           |           |  |
| 1,3013546                                |   |            |           |           |  |
| W -0,1693465                             |   |            |           |           |  |
| 1,2688758                                |   |            |           |           |  |
| 2,6076583                                |   |            |           |           |  |
| C -1,1961340                             |   |            |           |           |  |
| 3,8699118                                |   |            |           |           |  |
| 0,3069750                                |   |            |           |           |  |
| H -1,7405477                             |   |            |           |           |  |
| 4,2375041                                |   |            |           |           |  |
| -0,5688945                               |   |            |           |           |  |
| H -1,4274730                             |   |            |           |           |  |
| 4,5208904                                |   |            |           |           |  |
| 1,1591677                                |   |            |           |           |  |
| H -0,1204699                             |   |            |           |           |  |
| 3,9147523                                |   |            |           |           |  |
| 0,1129891                                |   |            |           |           |  |
| <b>2-<sup>t</sup>Bu<sup>-</sup></b>      |   |            |           |           |  |
| [W(CO) <sub>5</sub> ]PCl <sup>t</sup> Bu |   |            |           |           |  |
| 26                                       |   |            |           |           |  |
| Energy = -1594.031168028574              |   |            |           |           |  |
| P -1,2739131                             |   |            |           |           |  |
| 0,3418998                                |   |            |           |           |  |
| 0,9356328                                |   |            |           |           |  |
| Cl -1,3294055                            |   |            |           |           |  |
| 1,5123540                                |   |            |           |           |  |
| -0,8986185                               |   |            |           |           |  |
| C 1,1934870                              |   |            |           |           |  |
| -3,3924298                               |   |            |           |           |  |
| -0,2408407                               |   |            |           |           |  |
| O 1,7515119                              |   |            |           |           |  |
| -4,3591357                               |   |            |           |           |  |
| -0,5934380                               |   |            |           |           |  |
| C 1,3485966                              |   |            |           |           |  |
| -0,4758425                               |   |            |           |           |  |
| -0,8588807                               |   |            |           |           |  |
| O 1,9713662                              |   |            |           |           |  |
| 0,2519775                                |   |            |           |           |  |
| -1,5114786                               |   |            |           |           |  |
| C 1,6588868                              |   |            |           |           |  |
| -1,5141549                               |   |            |           |           |  |
| 1,8060042                                |   |            |           |           |  |
| O 2,4965732                              |   |            |           |           |  |
| -1,4490082                               |   |            |           |           |  |
| 2,6105282                                |   |            |           |           |  |
| C -0,9549754                             |   |            |           |           |  |
| -2,7212352                               |   |            |           |           |  |
| 1,6770923                                |   |            |           |           |  |
| O -1,6392713                             |   |            |           |           |  |
| -3,2466138                               |   |            |           |           |  |
| 2,4551790                                |   |            |           |           |  |
| C -1,1365220                             |   |            |           |           |  |
| -1,9976348                               |   |            |           |           |  |
| -1,1649969                               |   |            |           |           |  |
| O -1,9005492                             |   |            |           |           |  |
| -2,1736427                               |   |            |           |           |  |
| -2,0193979                               |   |            |           |           |  |
| W 0,2406934                              |   |            |           |           |  |
| -1,7256822                               |   |            |           |           |  |
| 0,3412901                                |   |            |           |           |  |
| C -0,3818768                             |   |            |           |           |  |
| 1,5926859                                |   |            |           |           |  |
| 2,0478756                                |   |            |           |           |  |
| C -0,3301753                             |   |            |           |           |  |
| 0,8952807                                |   |            |           |           |  |
| 3,4201213                                |   |            |           |           |  |
| H 0,2729345                              |   |            |           |           |  |
| -0,0163816                               |   |            |           |           |  |
| 3,3867167                                |   |            |           |           |  |
| H 0,1159080                              |   |            |           |           |  |
| 1,5735231                                |   |            |           |           |  |
| 4,1591095                                |   |            |           |           |  |
| H -1,3365171                             |   |            |           |           |  |
| 0,6298652                                |   |            |           |           |  |
| 3,7657418                                |   |            |           |           |  |
| C -1,2557568                             |   |            |           |           |  |
| 2,8542806                                |   |            |           |           |  |
| 2,1637620                                |   |            |           |           |  |
| H -0,8103288                             |   |            |           |           |  |
| 3,5471426                                |   |            |           |           |  |
| 2,8909474                                |   |            |           |           |  |
| <b>2-Ph<sup>-</sup></b>                  |   |            |           |           |  |
| [W(CO) <sub>5</sub> ]PClPh               |   |            |           |           |  |
| 24                                       |   |            |           |           |  |
| Energy = -1667.877312903094              |   |            |           |           |  |
| P -1,4538875                             |   |            |           |           |  |
| 0,4138344                                |   |            |           |           |  |
| 0,9622697                                |   |            |           |           |  |
| Cl -1,6043492                            |   |            |           |           |  |
| 1,4661054                                |   |            |           |           |  |
| -0,9181685                               |   |            |           |           |  |
| C 1,2313182                              |   |            |           |           |  |
| -3,2433676                               |   |            |           |           |  |
| 0,0401754                                |   |            |           |           |  |
| O 1,9162988                              |   |            |           |           |  |
| -4,1545926                               |   |            |           |           |  |
| -0,2237582                               |   |            |           |           |  |
| C 1,3118740                              |   |            |           |           |  |
| -0,3032953                               |   |            |           |           |  |
| -0,4608639                               |   |            |           |           |  |
| O 1,9856962                              |   |            |           |           |  |
| 0,4947184                                |   |            |           |           |  |
| -0,9625034                               |   |            |           |           |  |
| C 1,1091321                              |   |            |           |           |  |
| -1,3653909                               |   |            |           |           |  |
| 2,2216190                                |   |            |           |           |  |
| O 1,6996738                              |   |            |           |           |  |
| -1,2136615                               |   |            |           |           |  |
| 3,2085337                                |   |            |           |           |  |
| C -1,2899797                             |   |            |           |           |  |
| -2,8042206                               |   |            |           |           |  |
| 1,4838643                                |   |            |           |           |  |
| O -2,0818153                             |   |            |           |           |  |
| -3,4283717                               |   |            |           |           |  |
| 2,0608747                                |   |            |           |           |  |
| C -1,0013919                             |   |            |           |           |  |
| -1,9213301                               |   |            |           |           |  |
| -1,2611381                               |   |            |           |           |  |
| O -1,6126743                             |   |            |           |           |  |
| -2,0772163                               |   |            |           |           |  |
| -2,2341405                               |   |            |           |           |  |
| W 0,0775070                              |   |            |           |           |  |
| -1,6602453                               |   |            |           |           |  |
| 0,4711734                                |   |            |           |           |  |
| C -0,3888201                             |   |            |           |           |  |
| 1,5871450                                |   |            |           |           |  |
| 1,8890682                                |   |            |           |           |  |
| C -0,3638510                             |   |            |           |           |  |
| 1,4057055                                |   |            |           |           |  |
| 3,2864775                                |   |            |           |           |  |
| C 0,3714147                              |   |            |           |           |  |
| 2,6325752                                |   |            |           |           |  |
| 1,3422984                                |   |            |           |           |  |
| C 0,4131921                              |   |            |           |           |  |
| 2,2236983                                |   |            |           |           |  |
| 4,1024788                                |   |            |           |           |  |
| H -0,9568387                             |   |            |           |           |  |
| 0,6099259                                |   |            |           |           |  |
| 3,7345679                                |   |            |           |           |  |
| C 1,1403587                              |   |            |           |           |  |
| 3,4593731                                |   |            |           |           |  |
| 2,1640998                                |   |            |           |           |  |
| H 0,3630921                              |   |            |           |           |  |
| 2,7961430                                |   |            |           |           |  |
| 0,2693859                                |   |            |           |           |  |
| C 1,1706595                              |   |            |           |           |  |
| 3,2594693                                |   |            |           |           |  |
| 3,5456503                                |   |            |           |           |  |
| H 0,4205558                              |   |            |           |           |  |
| 2,0585390                                |   |            |           |           |  |
| 5,1769988                                |   |            |           |           |  |
| H 1,7223855                              |   |            |           |           |  |
| 4,2624754                                |   |            |           |           |  |
| 1,7181346                                |   |            |           |           |  |
| H 1,7703494                              |   |            |           |           |  |
| 3,9044839                                |   |            |           |           |  |
| 4,1819023                                |   |            |           |           |  |
| <b>2-Anth<sup>-</sup></b>                |   |            |           |           |  |
| [W(CO) <sub>5</sub> ]PClAnth             |   |            |           |           |  |
| 36                                       |   |            |           |           |  |
| Energy = -1975.344916160436              |   |            |           |           |  |
| P -1,3162184                             |   |            |           |           |  |
| -0,0505676                               |   |            |           |           |  |
| 1,4667530                                |   |            |           |           |  |
| Cl -2,1592992                            |   |            |           |           |  |
| 1,1431701                                |   |            |           |           |  |
| -0,1661834                               |   |            |           |           |  |
| C 1,4229254                              |   |            |           |           |  |
| -3,1222239                               |   |            |           |           |  |
| -0,6361713                               |   |            |           |           |  |
| O 2,1124122                              |   |            |           |           |  |
| -3,8849445                               |   |            |           |           |  |
| -1,1933311                               |   |            |           |           |  |
| C 1,1539077                              |   |            |           |           |  |
| -0,1499134                               |   |            |           |           |  |
| -0,5940764                               |   |            |           |           |  |
| O 1,6083996                              |   |            |           |           |  |
| 0,7902615                                |   |            |           |           |  |
| -1,0969247                               |   |            |           |           |  |

C 1,5837405 -1,8005848 1,8807574  
 O 2,3250785 -1,8778107 2,7717507  
 C -0,8085381 -3,2247312 1,2777343  
 O -1,4373009 -4,0253646 1,8358722  
 C -1,1009794 -1,8731281 -1,2299724  
 O -1,8682010 -1,9701189 -2,0929861  
 W 0,2670840 -1,7759411 0,3046629  
 C -0,4213418 1,3329419 2,2949339  
 C -1,1837265 2,3417351 3,0081053  
 C 0,9565139 1,3965462 2,3530024  
 C -2,5826815 2,3552967 3,0291889  
 C -0,4792539 3,3823316 3,7292355  
 C 1,6449511 2,4004741 3,0861770  
 H 1,5411376 0,6630919 1,8113570  
 C -3,3101870 3,3443422 3,7057043  
 H -3,1232039 1,5706422 2,5072287  
 C -1,2040468 4,3734405 4,4045330  
 C 0,9475920 3,3754869 3,7495580  
 H 2,7315776 2,3944602 3,0976918  
 C -4,7374787 3,3531145 3,7207512  
 C -2,6038601 4,3883330 4,4099392  
 H -0,6609429 5,1494474 4,9407051  
 H 1,4641943 4,1588399 4,2989642  
 C -5,4283141 4,3344064 4,3875769  
 H -5,2660793 2,5652523 3,1896720  
 C -3,3580885 5,3910282 5,0908557  
 C -4,7305244 5,3654272 5,0801718  
 H -6,5147834 4,3310753 4,3907956  
 H -2,8223161 6,1765871 5,6185827  
 H -5,2948484 6,1336968 5,6015846

**2-NH<sub>2</sub><sup>-</sup> [W(CO)<sub>5</sub>]PClNH<sub>2</sub>**

16

Energy = -1492.086131680954

P -1,8000511 2,1777467 0,7404140  
 Cl -1,1615585 1,0206992 -1,1247805  
 C 1,1008475 0,6187603 3,9852518  
 O 1,8630890 0,2515824 4,7929344  
 C 1,3009450 1,7296423 1,2195252  
 O 2,0954417 2,0139738 0,4235746  
 C -0,0986146 3,1878464 3,3189852  
 O -0,0689128 4,2707657 3,7374638  
 C -1,8179744 0,9155567 3,7488237  
 O -2,7667257 0,7250297 4,3918481  
 C -0,3748655 -0,6034047 1,7658007  
 O -0,4996399 -1,6649693 1,3164358  
 N -1,2623829 3,7489809 0,4182722  
 H -0,2756132 3,9888090 0,4516948  
 H -1,7511994 4,2704802 -0,3041549  
 W -0,1747852 1,2774008 2,5763110

**2-NMe<sub>2</sub><sup>-</sup> [W(CO)<sub>5</sub>]PClNMe<sub>2</sub>**

22

Energy = -1570.745391823646

P -0,2293171 -0,0079409 -0,0845211  
 N 0,0134297 1,0799635 1,1857596  
 C -0,5942734 2,4077608 1,2938173  
 H 0,0441155 3,0538395 1,9082965  
 H -0,7008491 2,8459632 0,3034797  
 H -1,5865083 2,3470007 1,7647283  
 C 0,2665052 0,4961007 2,5113629  
 H -0,6687940 0,3763961 3,0784595  
 H 0,7367757 -0,4819626 2,3913508  
 H 0,9348807 1,1551778 3,0790621  
 W -0,3116525 1,2073241 -2,3938113  
 C 0,9223429 2,6721901 -1,6577527  
 O 1,6484153 3,4785534 -1,2431227  
 C -2,0181561 2,1940026 -1,7974254  
 O -2,9891498 2,7283180 -1,4583390  
 C -0,3379643 2,0631533 -4,2131524  
 O -0,3645636 2,5769035 -5,2634667  
 C 1,3578989 0,1142857 -2,8659837  
 O 2,2992893 -0,5153918 -3,1235116  
 C -1,4721479 -0,3641332 -3,0390035  
 O -2,1082577 -1,2590641 -3,4112431  
 Cl -2,4321195 -0,6305405 0,2487164

**2-NCy<sub>2</sub><sup>-</sup> [W(CO)<sub>5</sub>]PClNCy<sub>2</sub>**

48

Energy = -1961.711687519924

P -1,2720060 0,5465614 1,1062147  
 Cl -1,8474214 1,5714956 -0,9334909  
 C 1,1870803 -3,0993888 -0,3148482  
 O 1,7763254 -4,0381738 -0,6892316  
 C 1,1597988 -0,2231724 -1,0145116  
 O 1,6754064 0,4792469 -1,7784034  
 C 1,5963863 -1,1981439 1,7890585  
 O 2,3764801 -1,0976013 2,6445215  
 C -0,9032636 -2,5503355 1,6621983  
 O -1,5413116 -3,1432207 2,4309508  
 C -1,2765866 -1,7903912 -1,0877512  
 O -2,1073276 -2,0102373 -1,8658028  
 N -0,4114265 1,7510535 1,9093655  
 W 0,1964249 -1,4679930 0,3132749  
 C -1,2706108 2,6402448 2,7479577  
 C -1,1184883 2,3624634 4,2541866  
 C -1,1758775 4,1422338 2,4472121  
 H -2,2924327 2,3358241 2,4852548  
 C -2,1830338 3,1326992 5,0488125  
 H -0,1235118 2,6613672 4,5998892  
 H -1,2142482 1,2833168 4,4220565  
 C -2,2390021 4,9064270 3,2526911

|   |            |           |            |
|---|------------|-----------|------------|
| H | -0,1836441 | 4,5252892 | 2,7146742  |
| H | -1,3191007 | 4,3111595 | 1,3750852  |
| C | -2,1067289 | 4,6370015 | 4,7569952  |
| H | -2,0587946 | 2,9428846 | 6,1219725  |
| H | -3,1798452 | 2,7622480 | 4,7697123  |
| H | -2,1554542 | 5,9805484 | 3,0471734  |
| H | -3,2371764 | 4,5916619 | 2,9166680  |
| H | -2,8891136 | 5,1728361 | 5,3085607  |
| H | -1,1402922 | 5,0251471 | 5,1100675  |
| C | 1,0099566  | 2,0741767 | 1,6372096  |
| C | 1,2208500  | 3,1363135 | 0,5400893  |
| C | 1,8339978  | 2,4053883 | 2,8888427  |
| H | 1,4133338  | 1,1409213 | 1,2315490  |
| C | 2,7119600  | 3,2454983 | 0,1889944  |
| H | 0,8640846  | 4,1133118 | 0,8807871  |
| H | 0,6302197  | 2,8566476 | -0,3372584 |
| C | 3,3225110  | 2,5265383 | 2,5275628  |
| H | 1,4967499  | 3,3528209 | 3,3268247  |
| H | 1,6895111  | 1,6233833 | 3,6414977  |
| C | 3,5498935  | 3,5742784 | 1,4308011  |
| H | 2,8562475  | 4,0088722 | -0,5854420 |
| H | 3,0568002  | 2,2925039 | -0,2340746 |
| H | 3,9002900  | 2,7780634 | 3,4254097  |
| H | 3,6861779  | 1,5515339 | 2,1749148  |
| H | 4,6146116  | 3,6259125 | 1,1711373  |
| H | 3,2623008  | 4,5652836 | 1,8112411  |

**2-NPh<sub>2</sub><sup>-</sup> [W(CO)<sub>5</sub>]PCINPh<sub>2</sub>**

36

Energy = -1954.468902360317

|    |            |            |            |
|----|------------|------------|------------|
| P  | -1,2535309 | -0,7212214 | 2,1265412  |
| Cl | -3,4833193 | -0,6446822 | 1,7394394  |
| C  | 0,7743216  | -1,6992701 | -1,8838316 |
| O  | 1,2999059  | -2,0456352 | -2,8689078 |
| C  | 0,8993378  | 0,6666804  | -0,3237247 |
| O  | 1,5413642  | 1,6209507  | -0,4625830 |
| C  | 1,3903281  | -1,8516599 | 0,9651347  |
| O  | 2,2469705  | -2,2574778 | 1,6354760  |
| C  | -1,1268245 | -2,9078129 | -0,1045926 |
| O  | -1,6744168 | -3,9301947 | -0,0743734 |
| C  | -1,7186954 | -0,2833771 | -1,2125304 |
| O  | -2,6095196 | 0,1872432  | -1,7843480 |
| W  | -0,1348561 | -1,1111225 | -0,1906328 |
| N  | -0,9518655 | 0,8605525  | 2,7503271  |
| C  | -0,8326786 | 2,0558777  | 1,9797348  |
| C  | -1,6425565 | 2,2767637  | 0,8612530  |
| C  | 0,1229067  | 3,0168583  | 2,3402266  |
| C  | -1,4809481 | 3,4327112  | 0,0974202  |
| H  | -2,4017457 | 1,5453785  | 0,6112032  |
| C  | 0,2731419  | 4,1731259  | 1,5788892  |
| H  | 0,7497580  | 2,8455717  | 3,2104854  |

|   |            |            |            |
|---|------------|------------|------------|
| C | -0,5237039 | 4,3856323  | 0,4495570  |
| H | -2,1135550 | 3,5891763  | -0,7722315 |
| H | 1,0260668  | 4,9045416  | 1,8603953  |
| H | -0,3993622 | 5,2851536  | -0,1465900 |
| C | -1,0531580 | 1,0280242  | 4,1697849  |
| C | -1,8207212 | 2,0698961  | 4,7093984  |
| C | -0,3974749 | 0,1400210  | 5,0328404  |
| C | -1,9330110 | 2,2144485  | 6,0918471  |
| H | -2,3290050 | 2,7591559  | 4,0422371  |
| C | -0,5220044 | 0,2842685  | 6,4143223  |
| H | 0,2075523  | -0,6562418 | 4,6105546  |
| C | -1,2887416 | 1,3215680  | 6,9521732  |
| H | -2,5367906 | 3,0223533  | 6,4965801  |
| H | -0,0049946 | -0,4092984 | 7,0719743  |
| H | -1,3790745 | 1,4353405  | 8,0286506  |

**2-N(SiH<sub>3</sub>)<sub>2</sub><sup>-</sup> [W(CO)<sub>5</sub>]PCIN(SiH<sub>3</sub>)<sub>2</sub>**

22

Energy = -2073.597721301266

|    |            |            |            |
|----|------------|------------|------------|
| P  | -1,3738883 | -0,1668918 | 1,8177684  |
| Cl | -2,7634116 | 0,9492228  | 0,5215758  |
| C  | 1,3541035  | -2,6507587 | -0,9473036 |
| O  | 2,0458471  | -3,3018218 | -1,6271618 |
| C  | 0,6049216  | 0,1341354  | -0,9534431 |
| O  | 0,8396435  | 1,0212859  | -1,6616737 |
| C  | 1,7149143  | -1,1370348 | 1,5269640  |
| O  | 2,5630062  | -0,9638672 | 2,2993205  |
| C  | -0,3181818 | -3,1506360 | 1,3427040  |
| O  | -0,5997503 | -4,0860146 | 1,9686732  |
| C  | -1,4820264 | -1,8562045 | -0,9479324 |
| O  | -2,4247455 | -2,0627309 | -1,5896551 |
| N  | -0,5389648 | 1,1627369  | 2,5810876  |
| W  | 0,1766277  | -1,5062767 | 0,2162620  |
| Si | -1,1867613 | 1,3353072  | 4,1939580  |
| H  | -0,4858252 | 2,4673143  | 4,8587358  |
| H  | -2,6448286 | 1,6164598  | 4,1747775  |
| H  | -0,9539558 | 0,1082768  | 4,9957279  |
| Si | 0,5184928  | 2,2806509  | 1,7609302  |
| H  | 1,7966624  | 1,6479313  | 1,3595812  |
| H  | -0,1327984 | 2,8257531  | 0,5470974  |
| H  | 0,8118188  | 3,3979626  | 2,6940062  |

**5-Me [W(CO)<sub>5</sub>]PMe**

16

Energy = -1015.569266519900

|   |            |           |           |
|---|------------|-----------|-----------|
| P | -1,7606135 | 2,2180007 | 0,9469284 |
| C | 1,1329130  | 0,5158253 | 3,9446603 |
| O | 1,8943267  | 0,0907978 | 4,6985967 |
| C | 1,3374373  | 1,7955765 | 1,2745850 |
| O | 2,1757176  | 2,0917388 | 0,5411033 |
| C | 0,0022988  | 3,2291441 | 3,3521495 |



|   |            |            |            |
|---|------------|------------|------------|
| O | 0,1037702  | 4,3051535  | 3,7533084  |
| C | -1,8017326 | 0,8908558  | 3,8224415  |
| O | -2,6965164 | 0,6412340  | 4,5043333  |
| C | -0,4951199 | -0,5469233 | 1,7335152  |
| O | -0,6773545 | -1,5875804 | 1,2719261  |
| W | -0,2068160 | 1,3256072  | 2,5697351  |
| C | -1,2189582 | 3,8688551  | 0,3281763  |
| H | -1,4257343 | 3,9447303  | -0,7455127 |
| H | -1,8910731 | 4,5896894  | 0,8222058  |
| H | -0,1854452 | 4,1471952  | 0,5435476  |

**5-<sup>t</sup>Bu [W(CO)<sub>5</sub>]P<sup>t</sup>Bu**

25

Energy = -1133.580826442887

|   |            |            |            |
|---|------------|------------|------------|
| P | -1,1758845 | 0,1072127  | 1,2628923  |
| C | 1,1858040  | -3,3126573 | -0,4406866 |
| O | 1,7395398  | -4,2135573 | -0,9010300 |
| C | 1,3884850  | -0,4125330 | -0,7487086 |
| O | 2,0620611  | 0,2695400  | -1,3879873 |
| C | 1,6286680  | -1,5452760 | 1,8837709  |
| O | 2,4329882  | -1,4903824 | 2,7093738  |
| C | -0,9479929 | -2,9716880 | 1,5301856  |
| O | -1,5949224 | -3,6916596 | 2,1549263  |
| C | -1,2237284 | -1,8306430 | -1,1006205 |
| O | -2,0260757 | -1,9291616 | -1,9223953 |
| W | 0,2053764  | -1,6785039 | 0,3899407  |
| C | -0,3164979 | 1,5554885  | 2,0858357  |
| C | -0,3006456 | 1,0932787  | 3,5700013  |
| H | 0,3937876  | 0,2638182  | 3,7279721  |
| H | 0,0241181  | 1,9427486  | 4,1852749  |
| H | -1,2963116 | 0,7910619  | 3,9165538  |
| C | -1,2272064 | 2,7935087  | 1,9532024  |
| H | -0,8087232 | 3,6188731  | 2,5438539  |
| H | -1,2968116 | 3,1204459  | 0,9103917  |
| H | -2,2375182 | 2,5823768  | 2,3178131  |
| C | 1,0995881  | 1,8957312  | 1,6158557  |
| H | 1,7779092  | 1,0458019  | 1,7197069  |
| H | 1,0983708  | 2,2128044  | 0,5686852  |
| H | 1,4972223  | 2,7225715  | 2,2187917  |

**5-Ph [W(CO)<sub>5</sub>]PPh**

23

Energy = -1207.432754107932

|   |            |            |            |
|---|------------|------------|------------|
| P | -1,0924067 | -0,1857344 | 1,7953479  |
| C | 1,1728831  | -3,0402875 | -0,8623977 |
| O | 1,7332675  | -3,7846072 | -1,5441833 |
| C | 0,9828198  | -0,0918664 | -0,7028880 |
| O | 1,4071364  | 0,8040164  | -1,2927261 |
| C | 1,8310605  | -1,6024099 | 1,6359768  |
| O | 2,7320198  | -1,5527459 | 2,3545313  |
| C | -0,6290352 | -3,2458312 | 1,4369101  |

|   |            |            |            |
|---|------------|------------|------------|
| O | -1,1071488 | -4,1154535 | 2,0241414  |
| C | -1,4605210 | -1,7627382 | -0,8673280 |
| O | -2,3936546 | -1,8205606 | -1,5422558 |
| W | 0,2028862  | -1,6825444 | 0,3635814  |
| C | -0,2408085 | 1,2718400  | 2,4192457  |
| C | -1,0201898 | 2,1272058  | 3,2407640  |
| C | 1,1041821  | 1,6341288  | 2,1703037  |
| C | -0,4796729 | 3,2877066  | 3,7845513  |
| H | -2,0544476 | 1,8596837  | 3,4404019  |
| C | 1,6425192  | 2,7915377  | 2,7144119  |
| H | 1,7228694  | 0,9993660  | 1,5469748  |
| C | 0,8518762  | 3,6205656  | 3,5218783  |
| H | -1,0898230 | 3,9316615  | 4,4107672  |
| H | 2,6767773  | 3,0553834  | 2,5145453  |
| H | 1,2775105  | 4,5257838  | 3,9453458  |

**5-anth [W(CO)<sub>5</sub>]PAnth**

35

Energy = -1514.905123317359

|   |            |            |            |
|---|------------|------------|------------|
| P | -1,1079222 | 0,3862284  | 0,9040766  |
| C | 1,0383991  | -3,4587960 | -0,0992054 |
| O | 1,5515384  | -4,4651383 | -0,3466157 |
| C | 1,7646280  | -0,6632883 | -0,4961830 |
| O | 2,6617756  | -0,1165016 | -0,9704995 |
| C | 1,0817427  | -1,5511959 | 2,1979831  |
| O | 1,5793541  | -1,4669283 | 3,2367234  |
| C | -1,4199544 | -2,7182654 | 1,1893069  |
| O | -2,2935060 | -3,3232439 | 1,6360438  |
| C | -0,8674017 | -1,6301974 | -1,4301011 |
| O | -1,4571003 | -1,6106865 | -2,4228569 |
| W | 0,1564591  | -1,6548298 | 0,3612295  |
| C | -0,3177183 | 1,5038894  | 2,0605489  |
| C | -1,1187478 | 2,4210226  | 2,8626240  |
| C | 1,0716812  | 1,6738762  | 2,0576503  |
| C | -2,4982087 | 2,2863093  | 3,0050507  |
| C | -0,4563756 | 3,4966116  | 3,5684918  |
| C | 1,7034733  | 2,7357977  | 2,7319562  |
| H | 1,6808465  | 0,9879541  | 1,4803517  |
| C | -3,2583742 | 3,1797027  | 3,7797970  |
| H | -3,0056071 | 1,4641900  | 2,5051225  |
| C | -1,2066690 | 4,3857988  | 4,3491609  |
| C | 0,9562714  | 3,6275648  | 3,4713024  |
| H | 2,7816395  | 2,8439152  | 2,6655474  |
| C | -4,6706758 | 3,0494258  | 3,9083294  |
| C | -2,5960514 | 4,2593199  | 4,4715451  |
| H | -0,6937739 | 5,1866301  | 4,8769997  |
| H | 1,4389065  | 4,4437970  | 4,0026726  |
| C | -5,3895670 | 3,9356963  | 4,6743871  |
| H | -5,1686265 | 2,2361172  | 3,3870043  |
| C | -3,3756805 | 5,1558772  | 5,2604917  |
| C | -4,7363218 | 4,9988817  | 5,3575037  |

H -6,4666464 3,8279521 4,7642446  
H -2,8705362 5,9640061 5,7831644  
H -5,3237510 5,6862070 5,9592520

**5-NH<sub>2</sub> [W(CO)<sub>5</sub>]PNH<sub>2</sub>**

15

Energy = -1031.662193219029

P -1,7805257 2,1786190 0,8942282  
C 1,0888139 0,5433816 3,9819431  
O 1,8209356 0,1185047 4,7698863  
C 1,3626006 1,7772339 1,2884626  
O 2,2042876 2,0573825 0,5485092  
C -0,0279578 3,2339496 3,3467096  
O 0,0439848 4,3176803 3,7404841  
C -1,8131479 0,9313874 3,7851337  
O -2,7282617 0,7077506 4,4535474  
C -0,4244649 -0,5342087 1,7125921  
O -0,5697147 -1,5730404 1,2287091  
N -1,2784568 3,6100177 0,2491059  
H -0,4242025 4,1047870 0,4941257  
H -1,8342936 4,0812139 -0,4598453  
W -0,1892968 1,3293406 2,5718082

**5-NMe<sub>2</sub> [W(CO)<sub>5</sub>]PNMe<sub>2</sub>**

21

Energy = -1110.326669544871

P -1,4037257 1,6815726 -0,1962570  
N -0,5181664 1,4656754 1,1857809  
C 0,8906937 1,0741543 1,3197366  
H 0,9533452 0,1470811 1,8995621  
H 1,3262584 0,9260574 0,3353454  
H 1,4335189 1,8612536 1,8540358  
C -1,1618282 1,6783377 2,4977304  
H -1,1059868 0,7531337 3,0809908  
H -0,6300620 2,4701890 3,0359249  
H -2,2028372 1,9631683 2,3458057  
C 1,4301365 2,3717173 -1,7954979  
O 2,3620988 2,9783176 -1,4809187  
C -1,1591007 3,0522629 -2,9683077  
O -1,6801061 4,0244767 -3,3128484  
C 0,5048689 1,0480113 -4,2514882  
O 0,9369555 0,9004754 -5,3156169  
C 0,6267400 -0,4567411 -1,7275075  
O 1,1022506 -1,4488810 -1,3739136  
C -1,9446976 0,2695400 -2,9054271  
O -2,8997279 -0,3018654 -3,2165389  
W -0,2449280 1,3047632 -2,3613906

**5-NCy<sub>2</sub> [W(CO)<sub>5</sub>]PNCy<sub>2</sub>**

47

Energy = -1501.295167090530

P -1,1594509 0,3509613 1,4131379  
C 1,0810888 -3,0729910 -0,5244812  
O 1,5846306 -3,9982008 -1,0070278  
C 1,1828849 -0,2039587 -1,0071232  
O 1,7297818 0,4548993 -1,7829128  
C 1,7453803 -1,2730691 1,6897451  
O 2,6014862 -1,2001988 2,4637132  
C -0,7918351 -2,6935548 1,6288802  
O -1,3493264 -3,4094868 2,3445394  
C -1,3793727 -1,5951594 -0,9862561  
O -2,2693095 -1,6953557 -1,7167967  
N -0,4035676 1,7328140 1,9437629  
W 0,2013610 -1,4350435 0,3300678  
C -1,2864174 2,6515303 2,7491210  
C -1,1436765 2,4030365 4,2607326  
C -1,1750202 4,1400985 2,4042919  
H -2,2988222 2,3311073 2,4760738  
C -2,2169712 3,1960935 5,0200031  
H -0,1531636 2,7080916 4,6102916  
H -1,2480257 1,3284545 4,4506843  
C -2,2483996 4,9225198 3,1795177  
H -0,1865982 4,5275842 2,6747718  
H -1,3099903 4,2844600 1,3277394  
C -2,1335071 4,6917786 4,6910390  
H -2,0993185 3,0308678 6,0971281  
H -3,2104759 2,8180322 4,7416294  
H -2,1559775 5,9890902 2,9451421  
H -3,2422983 4,6021050 2,8378248  
H -2,9229902 5,2407426 5,2174443  
H -1,1719853 5,0882691 5,0466552  
C 1,0322376 2,0486139 1,6977809  
C 1,2266048 3,0635315 0,5553016  
C 1,8262203 2,4433737 2,9496212  
H 1,4433041 1,1012659 1,3385912  
C 2,7205523 3,1862623 0,2216893  
H 0,8432654 4,0452010 0,8445269  
H 0,6573986 2,7295423 -0,3188396  
C 3,3153998 2,5783262 2,5946405  
H 1,4661196 3,3985057 3,3471358  
H 1,6896784 1,6846196 3,7269177  
C 3,5321339 3,5859852 1,4597336  
H 2,8534745 3,9198320 -0,5815234  
H 3,0914132 2,2250341 -0,1569053  
H 3,8728078 2,8784258 3,4891981  
H 3,7041093 1,5978600 2,2878247  
H 4,5975575 3,6494063 1,2096278  
H 3,2185095 4,5847968 1,7948402

**5-NPh<sub>2</sub> [W(CO)<sub>5</sub>]PNPh<sub>2</sub>**

35

Energy = -1494.042914613830

|   |            |            |            |    |            |            |           |
|---|------------|------------|------------|----|------------|------------|-----------|
| P | -0,7613058 | 0,5218718  | 0,4024372  | W  | 0,2715141  | -1,5440623 | 0,2880315 |
| C | 1,2720936  | -3,4811424 | 0,6973467  | Si | -1,6000580 | 1,6038233  | 3,9937773 |
| O | 1,8147780  | -4,5023295 | 0,6453188  | H  | -1,4467680 | 3,0765828  | 4,0551729 |
| C | 2,0009069  | -0,7685070 | -0,0220020 | H  | -3,0006456 | 1,2369150  | 3,7064072 |
| O | 2,9466480  | -0,2664994 | -0,4534169 | H  | -1,1398165 | 0,9892772  | 5,2580439 |
| C | 1,0953311  | -1,3330081 | 2,6548944  | Si | 0,6976653  | 2,1525909  | 2,0364281 |
| O | 1,5961701  | -1,2206476 | 3,6885218  | H  | 1,8175878  | 1,3656197  | 1,4929585 |
| C | -1,3464118 | -2,5529765 | 1,6345521  | H  | 0,1086501  | 3,0229034  | 0,9952890 |
| O | -2,2639498 | -3,0485856 | 2,1285387  | H  | 1,1411462  | 2,9687078  | 3,1887772 |
| C | -0,3931840 | -2,0629490 | -1,1237684 |    |            |            |           |
| O | -0,7705772 | -2,3022384 | -2,1901477 |    |            |            |           |
| W | 0,3144019  | -1,6689497 | 0,7679970  |    |            |            |           |
| N | -0,9777885 | 1,5251329  | 1,7436269  |    |            |            |           |
| C | -1,3415176 | 2,9049273  | 1,5405672  |    |            |            |           |
| C | -2,3012686 | 3,4986479  | 2,3698126  |    |            |            |           |
| C | -0,7433420 | 3,6412497  | 0,5126096  |    |            |            |           |
| C | -2,6753766 | 4,8221590  | 2,1489362  |    |            |            |           |
| H | -2,7568445 | 2,9221630  | 3,1683090  |    |            |            |           |
| C | -1,1280959 | 4,9638093  | 0,2973137  |    |            |            |           |
| H | 0,0298688  | 3,1795741  | -0,0936354 |    |            |            |           |
| C | -2,0948664 | 5,5575570  | 1,1116716  |    |            |            |           |
| H | -3,4272970 | 5,2776057  | 2,7865312  |    |            |            |           |
| H | -0,6563883 | 5,5348780  | -0,4967520 |    |            |            |           |
| H | -2,3861235 | 6,5906034  | 0,9472482  |    |            |            |           |
| C | -0,8526509 | 1,1279567  | 3,1234773  |    |            |            |           |
| C | 0,0531724  | 1,7970566  | 3,9506920  |    |            |            |           |
| C | -1,6559361 | 0,1031190  | 3,6256614  |    |            |            |           |
| C | 0,1719176  | 1,4122771  | 5,2842764  |    |            |            |           |
| H | 0,6625236  | 2,5986045  | 3,5449577  |    |            |            |           |
| C | -1,5341655 | -0,2727122 | 4,9624871  |    |            |            |           |
| H | -2,3819149 | -0,3703222 | 2,9741155  |    |            |            |           |
| C | -0,6175749 | 0,3766464  | 5,7917145  |    |            |            |           |
| H | 0,8862986  | 1,9184247  | 5,9265860  |    |            |            |           |
| H | -2,1613665 | -1,0672322 | 5,3553377  |    |            |            |           |
| H | -0,5222640 | 0,0814356  | 6,8322838  |    |            |            |           |

**5-N(SiH<sub>3</sub>)<sub>2</sub> [W(CO)<sub>5</sub>]PN(SiH<sub>3</sub>)<sub>2</sub>**

21

Energy = -1613.162081395819

|   |            |            |            |
|---|------------|------------|------------|
| P | -0,9419350 | -0,5146647 | 2,1467372  |
| C | 1,1253404  | -2,6560383 | -1,2281093 |
| O | 1,6092760  | -3,2748352 | -2,0745056 |
| C | 0,5621029  | 0,1916254  | -0,7943981 |
| O | 0,7215901  | 1,1406817  | -1,4323023 |
| C | 2,1199050  | -1,2971146 | 1,1917723  |
| O | 3,1467534  | -1,1706455 | 1,7008016  |
| C | -0,0376274 | -3,2960963 | 1,3348681  |
| O | -0,2171895 | -4,2821674 | 1,9076170  |
| C | -1,5801437 | -1,7837679 | -0,6045212 |
| O | -2,6123075 | -1,9232012 | -1,1004519 |
| N | -0,5597674 | 1,0459887  | 2,6452849  |

**Table S4.** GIAO TPSS-D3/def2-QZVP computed  $^{31}\text{P}$  chemical shifts (in ppm) using TPSS-D3/def2-TZVP + COSMO optimized geometries (see Table S2), using the experimental  $^{31}\text{P}$  NMR shift of **1a** [ $\text{W}(\text{CO})_5\text{PCl}_2\text{NPh}_2$ ] at 108.6 ppm (computed shielding constant: 141.93ppm) as reference. **9** as possible diphosphane (complex) side products.

| Compound               | Shift  | Atom | Compound                | Shift          | Atom |
|------------------------|--------|------|-------------------------|----------------|------|
| <b>1a</b>              | 108.6  | 1    | <b>5a.nH</b>            | 339.8          | 1    |
| <b>1b</b>              | 112.2  | 1    | <b>5b</b>               | 1053.8         | 1    |
| <b>2a<sup>-</sup></b>  | 346.5  | 1    | <b>6a,a'</b>            | -133.2, -139.1 | 1    |
| <b>2ac</b>             | 281.3  | 1    | <b>6b</b>               | -158.1         | 1    |
| <b>2ah<sup>-</sup></b> | 46.0   | 1    | <b>7b,b'</b>            | -133.1, -140.0 | 1    |
| <b>2aH</b>             | 38.5   | 1    | <b>7a</b>               | -140.4         | 1    |
| <b>2ahH</b>            | -33.4  | 1    | <b>8b,b'</b>            | -134.7, -135.6 | 1    |
| <b>2at<sub>2</sub></b> | 406.1  | 1    | <b>9a<sup>-</sup></b>   | 39.0           | 1    |
| <b>2at<sub>3</sub></b> | 280.2  | 1    | <b>9a<sup>-</sup></b>   | 136.4          | 37   |
| <b>2b<sup>-</sup></b>  | 313.7  | 1    | <b>9ac<sup>-</sup></b>  | 216.5          | 1    |
| <b>2bh<sup>-</sup></b> | -60.0  | 1    | <b>9ac<sup>-</sup></b>  | 120.1          | 37   |
| <b>2bH</b>             | 40.2   | 1    | <b>9acCl</b>            | 121.8          | 1    |
| <b>2bhH</b>            | -78.3  | 1    | <b>9acCl</b>            | 121.7          | 35   |
| <b>3a</b>              | 83.0   | 1    | <b>9aH</b>              | 47.6           | 1    |
| <b>3b</b>              | 58.4   | 1    | <b>9aH</b>              | 47.3           | 35   |
| <b>3ohH</b>            | 22.0   | 1    | <b>9b<sup>-</sup></b>   | 33.3           | 1    |
| <b>4a</b>              | 38.4   | 1    | <b>9b<sup>-</sup></b>   | 44.1           | 4    |
| <b>4anH</b>            | 79.1   | 1    | <b>9b0W<sup>-</sup></b> | -38.2          | 1    |
| <b>4b</b>              | 6.8    | 1    | <b>9b0W<sup>-</sup></b> | 13.3           | 38   |
| <b>4n</b>              | 20.2   | 1    | <b>9bH</b>              | -51.8          | 1    |
| <b>4nCl</b>            | 118.9  | 1    | <b>9bH</b>              | -51.1          | 4    |
| <b>4nhH</b>            | -51.2  | 1    | <b>9bHww</b>            | 8.4            | 1    |
| <b>5a</b>              | 1183.9 | 1    | <b>9bHww</b>            | 8.4            | 49   |
| <b>5a<sub>2</sub></b>  | 287.7  | 1    | <b>9bwW<sup>-</sup></b> | 5.0            | 1    |
| <b>5a<sub>2</sub></b>  | 287.9  | 36   | <b>9bwW<sup>-</sup></b> | 171.4          | 49   |
| <b>5aBe</b>            | -100.2 | 1    |                         |                |      |
